# Supplementary material for: Modeled deposition of nitrogen and sulfur in Europe estimated by 14 air quality model systems: evaluation, effects of changes in emissions and implications for habitat protection
Source: Copernicus journal article supplement (doi:10.5194/acp-18-10199-2018), 2018-07-17

Supplement of Atmos. Chem. Phys., 18, 10199–10218, 2018  
<https://doi.org/10.5194/acp-18-10199-2018-supplement>  
© Author(s) 2018. This work is distributed under  
the Creative Commons Attribution 4.0 License.

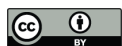

*Supplement of*

## **Modeled deposition of nitrogen and sulfur in Europe estimated by 14 air quality model systems: evaluation, effects of changes in emissions and implications for habitat protection**

**Marta G. Vivanco et al.**

*Correspondence to:* Marta G. Vivanco (m.garcia@ciemat.es)

The copyright of individual parts of the supplement might differ from the CC BY 4.0 License.

# **SUPPLEMENT**

## **S1. MAPS OF WET DEPOSITION FOR DIFFERENT COMPOUNDS**

**S1.1** Annual deposition of  $\text{WNH}_4\text{-N}$

**S1.2** Annual deposition of  $\text{WNO}_3\text{-N}$

**S1.3** Annual deposition of total wet N ( $\text{WNH}_4\text{-N} + \text{WNO}_3\text{-N}$ )

**S1.4** Annual deposition of  $\text{WSO}_4\text{-N}$

## **S2. MAPS OF DRY DEPOSITION FOR DIFFERENT COMPOUNDS**

**S2.1** Annual deposition of  $\text{DNH}_4\text{-N}$

**S2.2** Annual deposition of  $\text{DNO}_3\text{-N}$

**S2.3** Annual dry deposition of the gas and particle components contributing to  $\text{DNO}_3\text{-N}$

**S2.4** Annual deposition of total dry N ( $\text{DNH}_4\text{-N} + \text{DNO}_3\text{-N}$ )

**S2.5** Annual deposition of  $\text{DSO}_4\text{-S}$

## **S3. STATISTICS FOR WET DEPOSITION FOR DIFFERENT COMPOUNDS**

**S3.1** Statistics from monthly values (SMILE PLOTS)

**S3.2** Statistics by month (FB, NMSE and FAC2) for oxidised-N species (SMILE PLOTS)

**S3.3** Statistics by month (FB, NMSE and FAC2) for reduced-N species (SMILE PLOTS)

**S3.4** Statistics by month (FB, NMSE and FAC2) for S species (SMILE PLOTS)

**S3.5** Statistics by month (FB, NMSE and FAC2) for precipitation (SMILE PLOTS)

### **S3.6**

Tables with complete statistics from monthly values. All available sites.

**S3.7** Tables with complete statistics from annual values. All available sites.

**S3.8** Tables with complete statistics from annual values. Common sites.

**S3.9** Monthly values of WNO<sub>3\_N</sub>, WNH<sub>4\_N</sub>, WSO<sub>4\_S</sub> and precipitation Definition

**S3.10** Definition of statistical metrics in S3.6, 3.7 and 3.8

**S4.** Contribution of gas and particles phases

**S5.** Effect on wet deposition in Europe of a reduction of 20% of emissions  
1) at a global scale (GLO), 2) in Europe (EUR) and 3) in North America (NAM)

**S5.1.** EFFECT ON WET DEPOSTION IN EUROPE OF A REDUCTION OF A 20% OF GLOBAL EMISSIONS (GLO) FOR WNH<sub>4\_N</sub> (left), WNO<sub>3\_N</sub> (middle) and WSO<sub>4\_S</sub> (right), ACCORDING TO AQ\_FI1\_MACC

**S5.2.** EFFECT ON WET DEPOSTION IN EUROPE OF A REDUCTION OF A 20% OF EUROPEAN EMISSIONS (EUR) FOR WNH<sub>4\_N</sub> (left), WNO<sub>3\_N</sub> (middle) and WSO<sub>4\_S</sub> (right), ACCORDING TO AQ\_FI1\_MACC

**S5.3.** EFFECT ON WET DEPOSTION IN EUROPE OF A REDUCTION OF A 20% OF NORTH-AMERICAN EMISSIONS (NAM) FOR WNH<sub>4\_N</sub> (left), WNO<sub>3\_N</sub> (middle) and WSO<sub>4\_S</sub> (right), ACCORDING TO AQ\_FI1\_MACC

**S5.4.** Effect on Europe of the reduction of 20% of emissions at a global scale (left maps), in Europe (middle) and in North America (right) for WNO<sub>3\_N</sub>, according to HT\_FRES1\_HTAP in terms of wet deposition

**S6.** Effect on dry deposition in Europe of a reduction of 20% of emissions  
1) at a global scale (GLO), 2) in Europe (EUR) and 3) in North America (NAM)

**S7A.** Emissions of NO<sub>x</sub>, NH<sub>3</sub> and SO<sub>2</sub> for the AQMEI13/HTAP and ED/TFMM communities **B.** Differences between the emissions of NO<sub>x</sub>, NH<sub>3</sub> and SO<sub>2</sub> of the AQMEI13/HTAP and ED/TFMM communities

## S1.1 Annual deposition of WNH4\_N

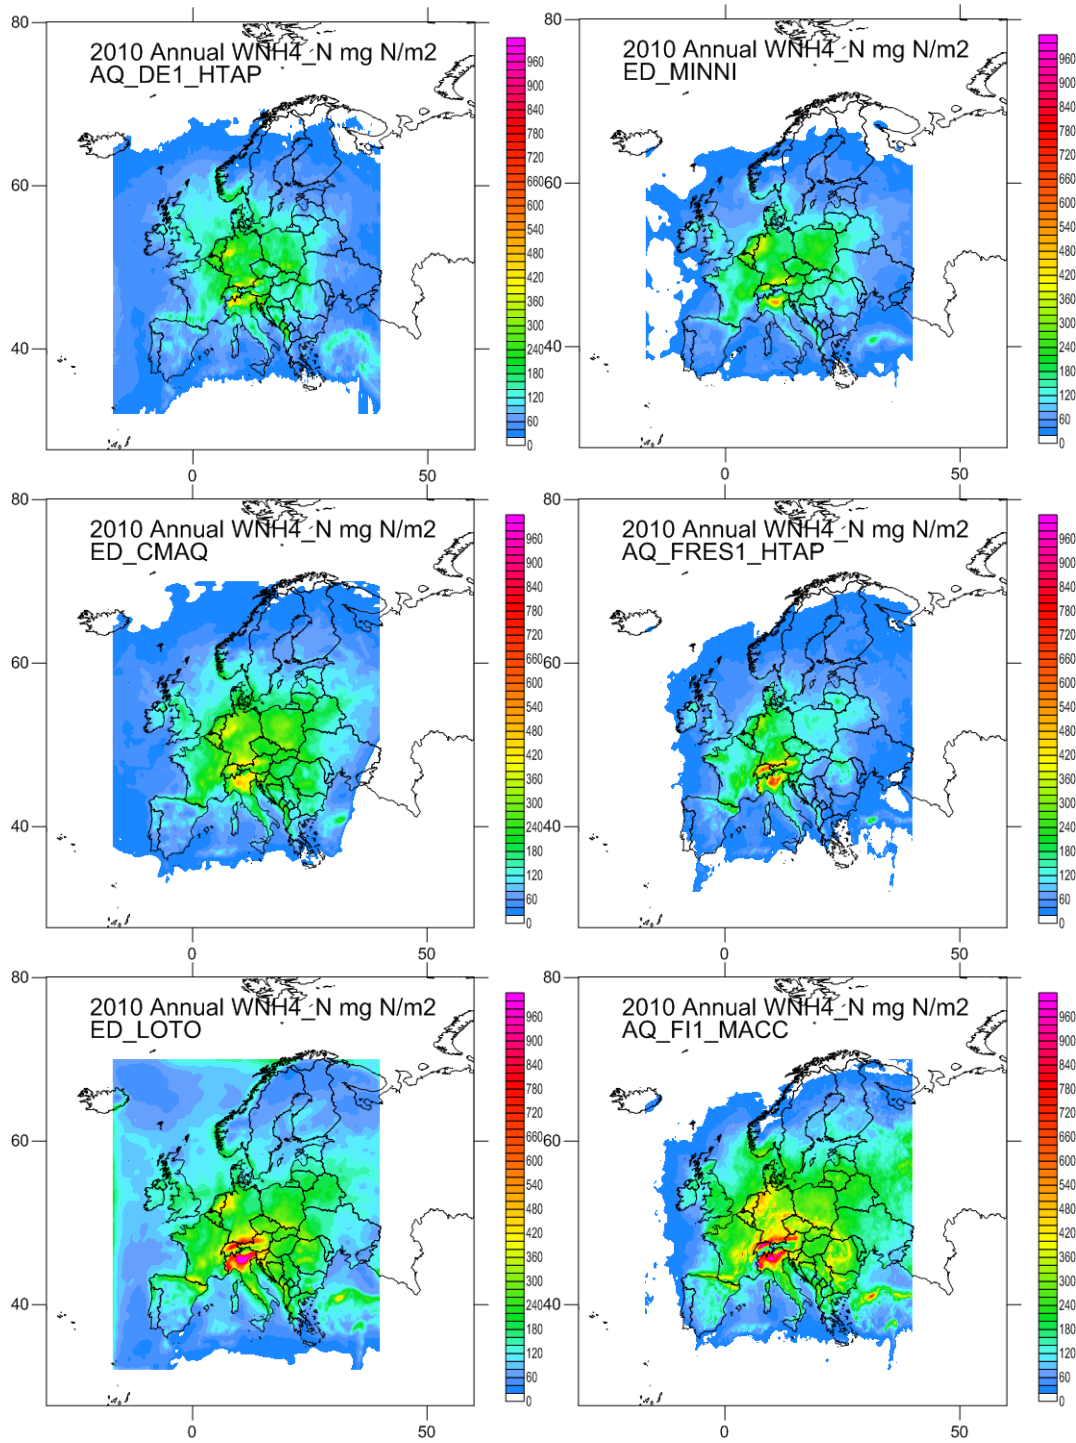

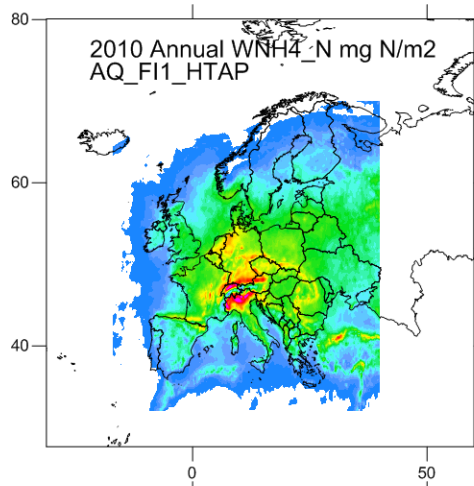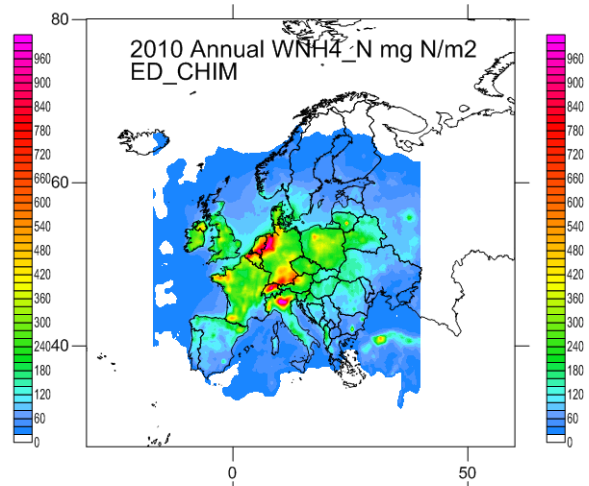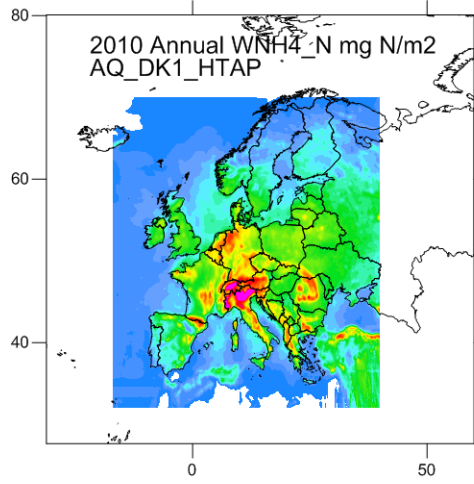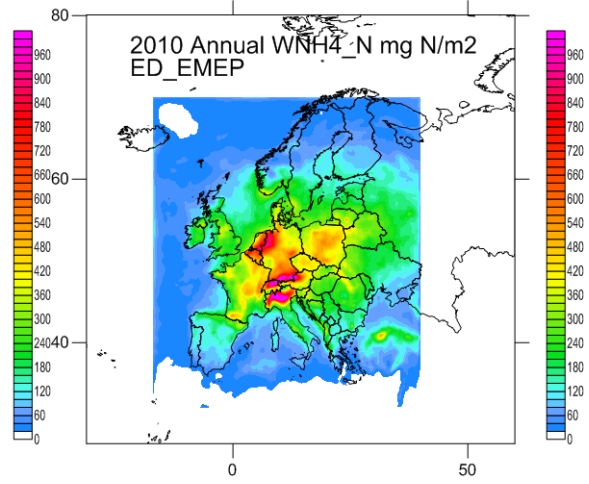

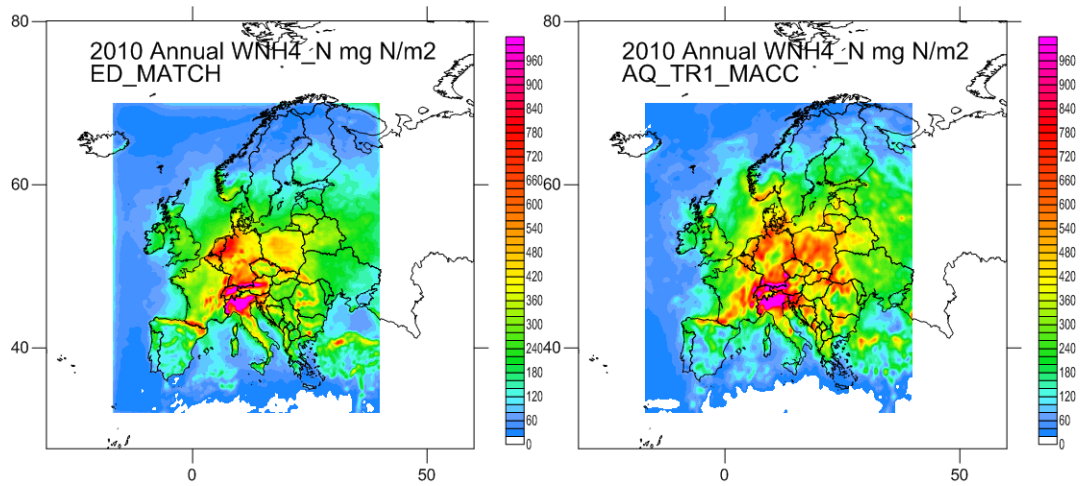

- AQ\_DE1\_HTAP
- AQ\_DK1\_HTAP
- AQ\_F11\_HTAP
- AQ\_F11\_MACC
- AQ\_FRES1\_HTAP
- AQ\_TR1\_MACC
- AQ\_UK1\_MACC
- AQ\_UK2\_HTAP
- ED\_CHIM
- ED\_CMAQ
- ED\_EMEP
- ED\_LOTO
- ED\_MATCH
- ED\_MINNI

- FAC2 < 0.5
- FAC2 >= 0.5

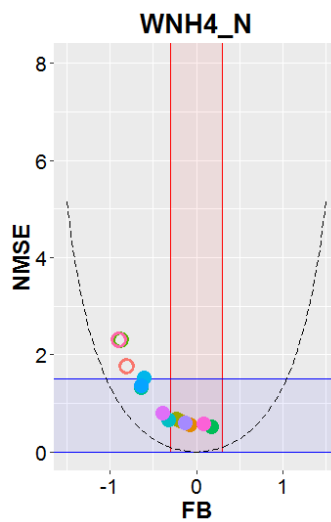

## S1.2 Annual deposition of WNO3\_N

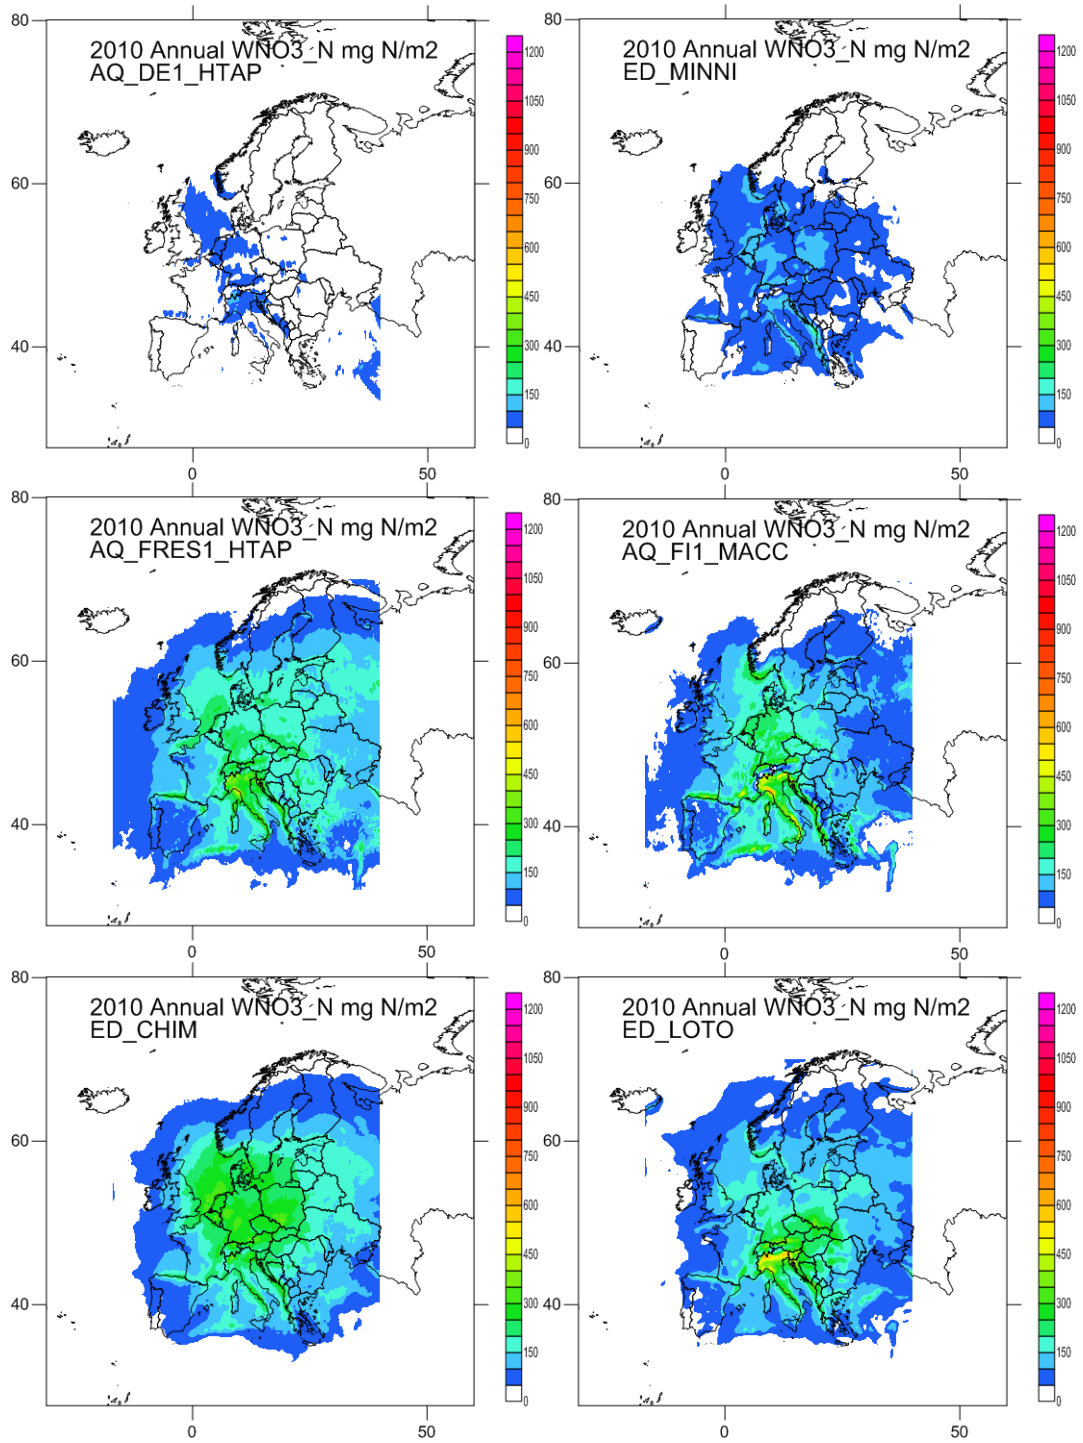



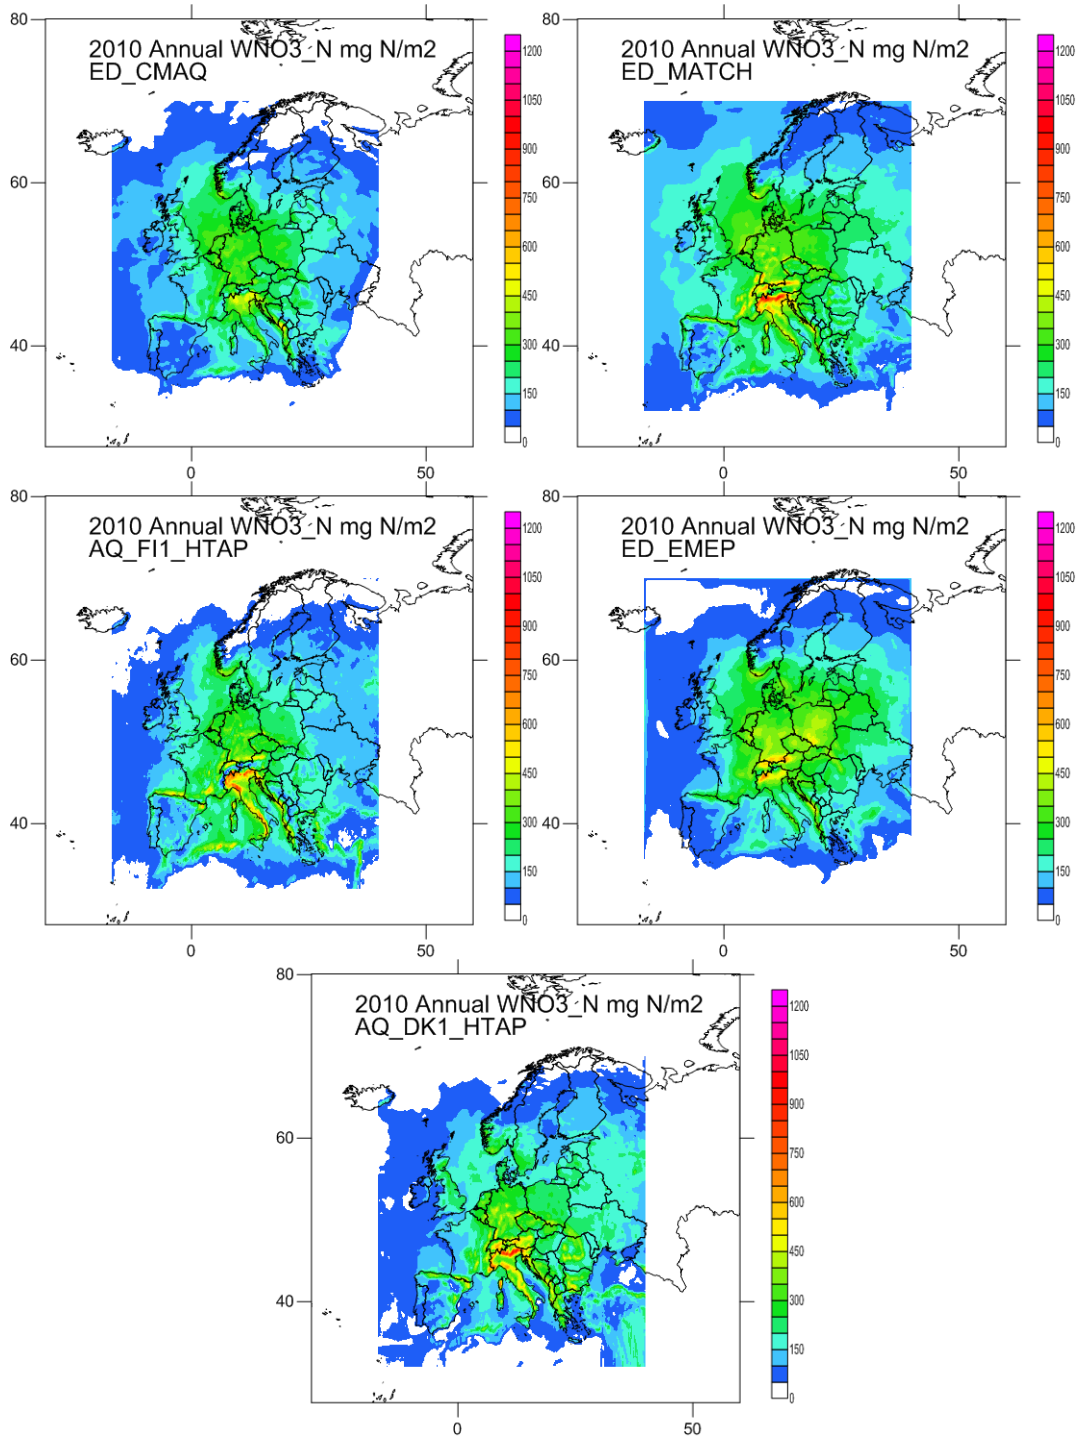

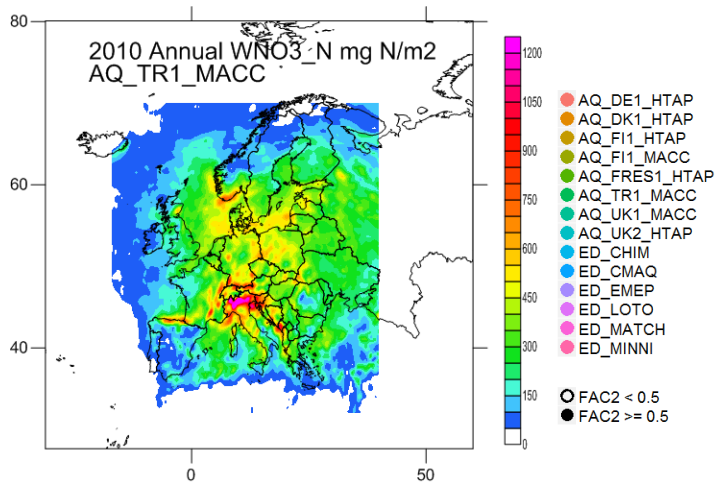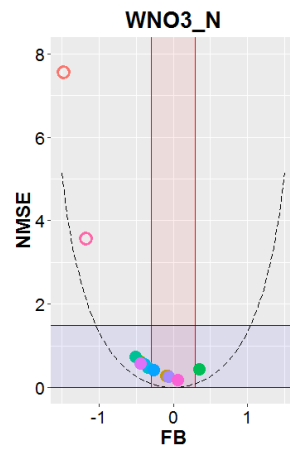

### S1.3 Annual deposition of total wet N (WNH4\_N + WNO3\_N)

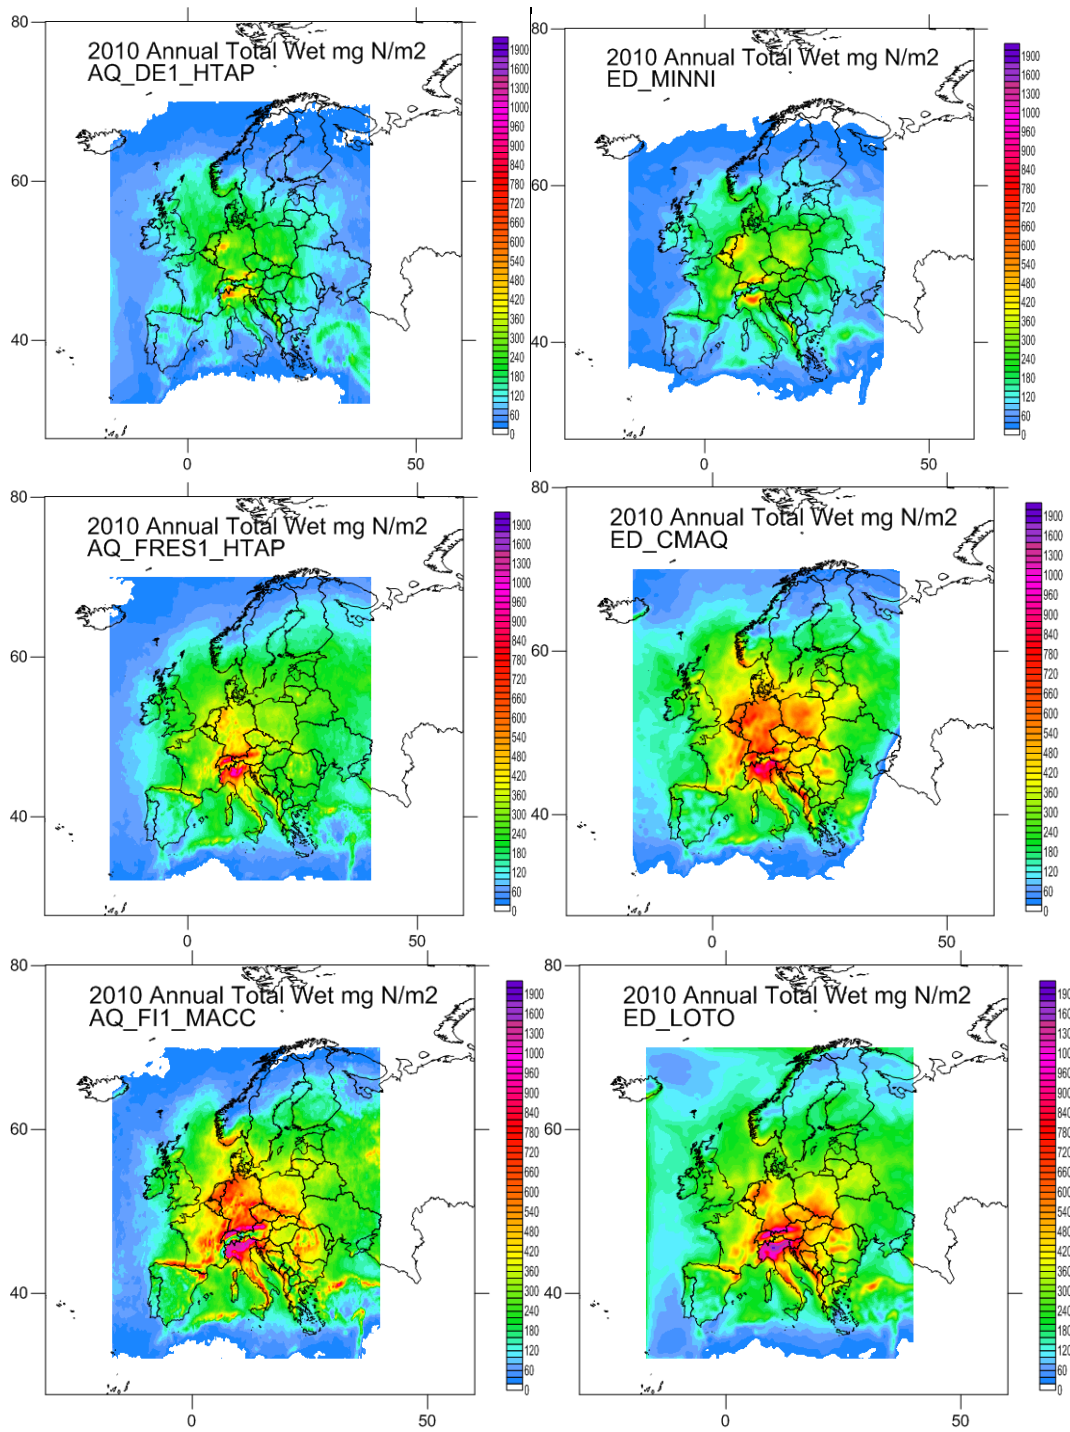

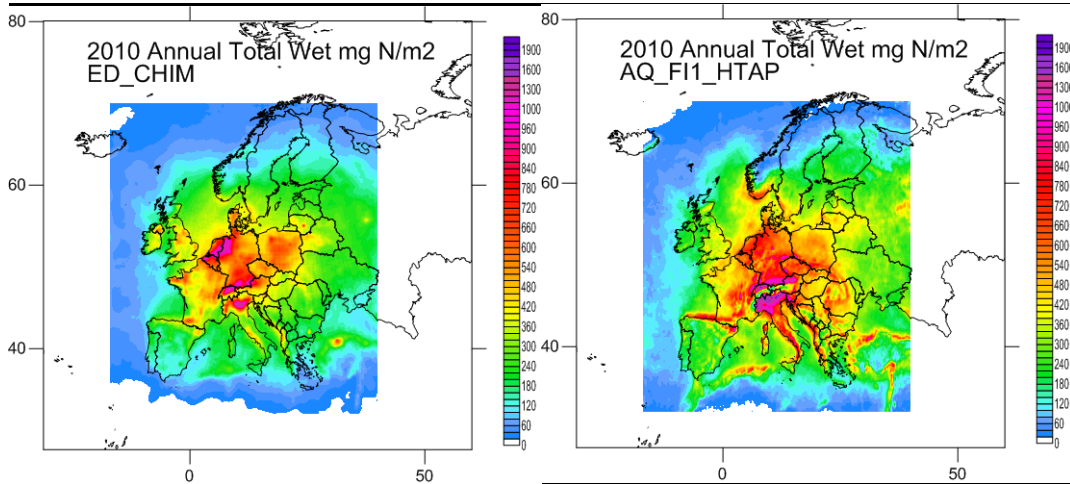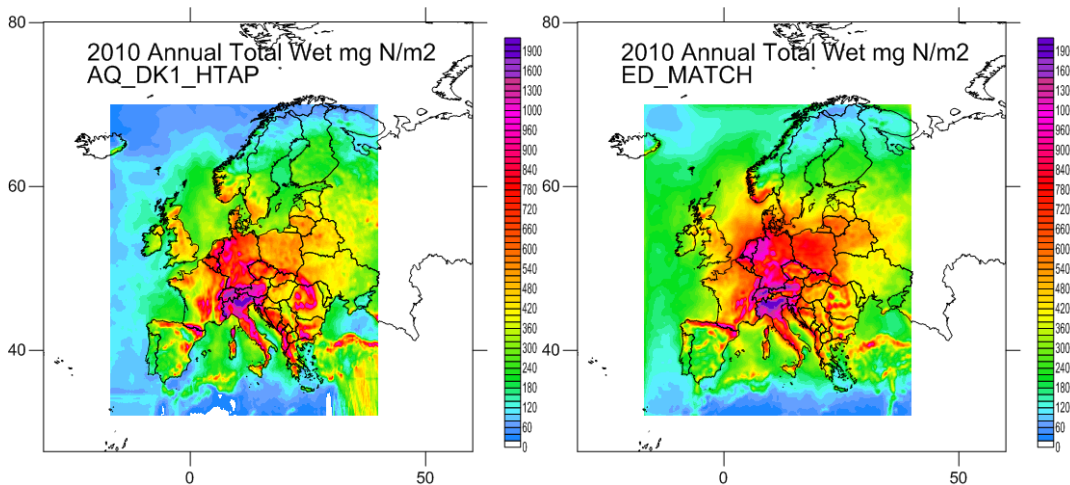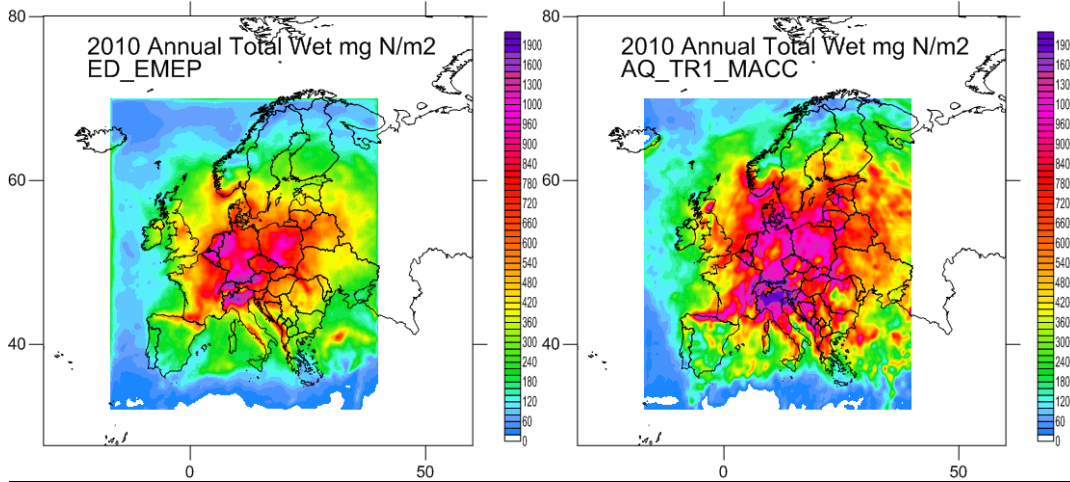

### S1.3 Annual deposition of WSO4\_S

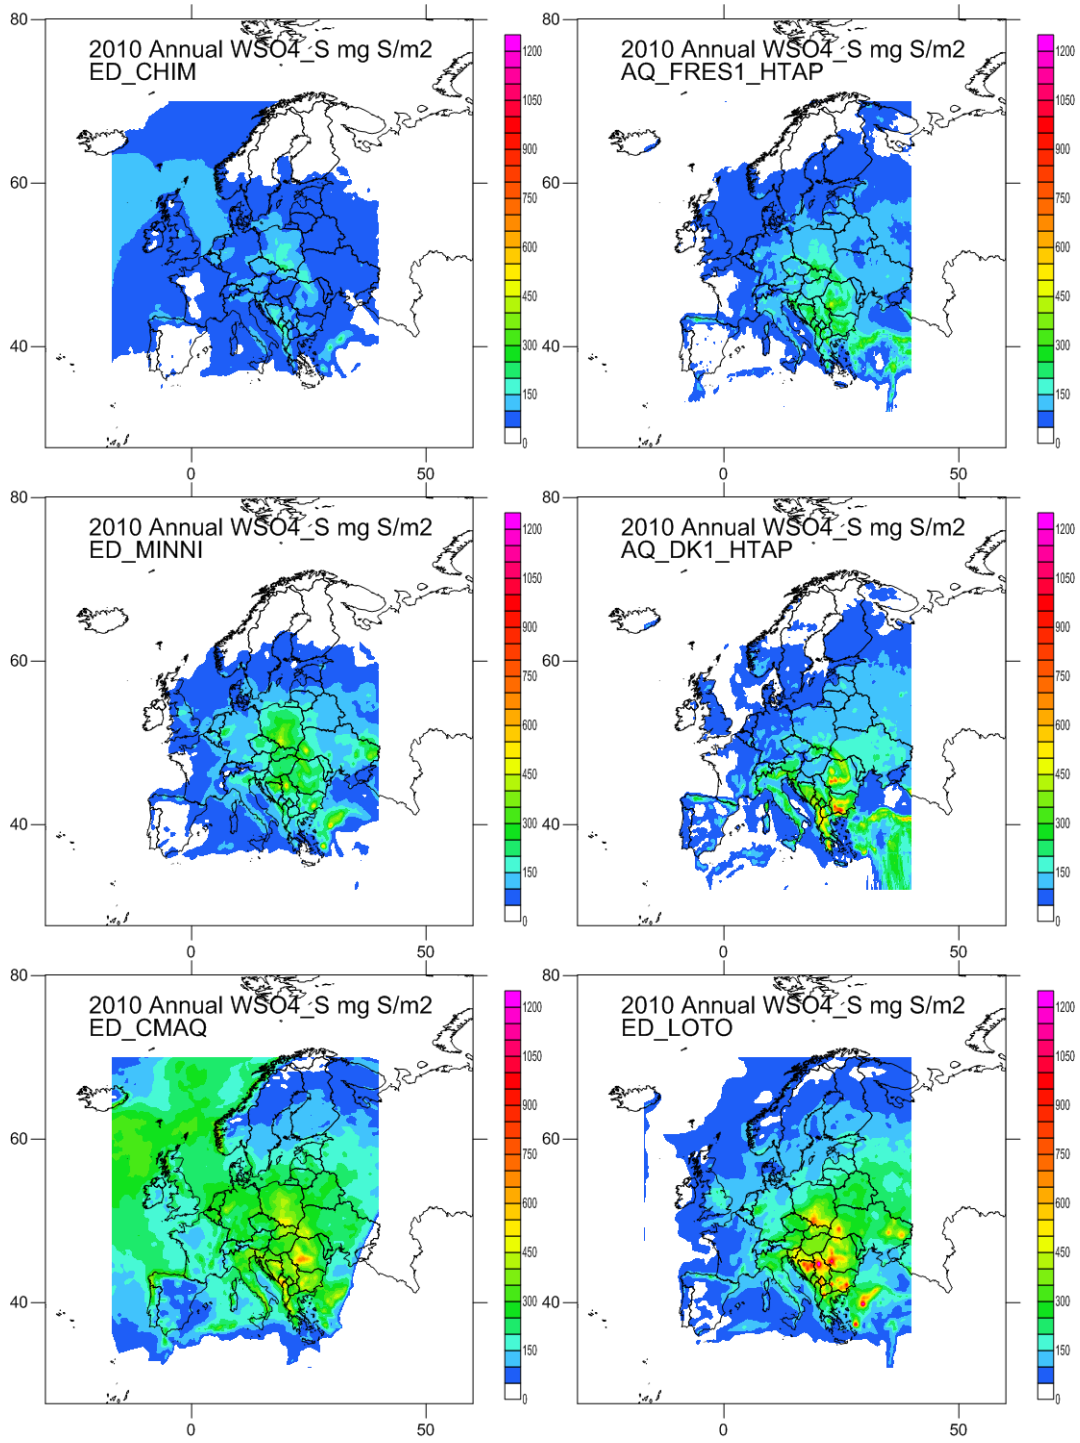

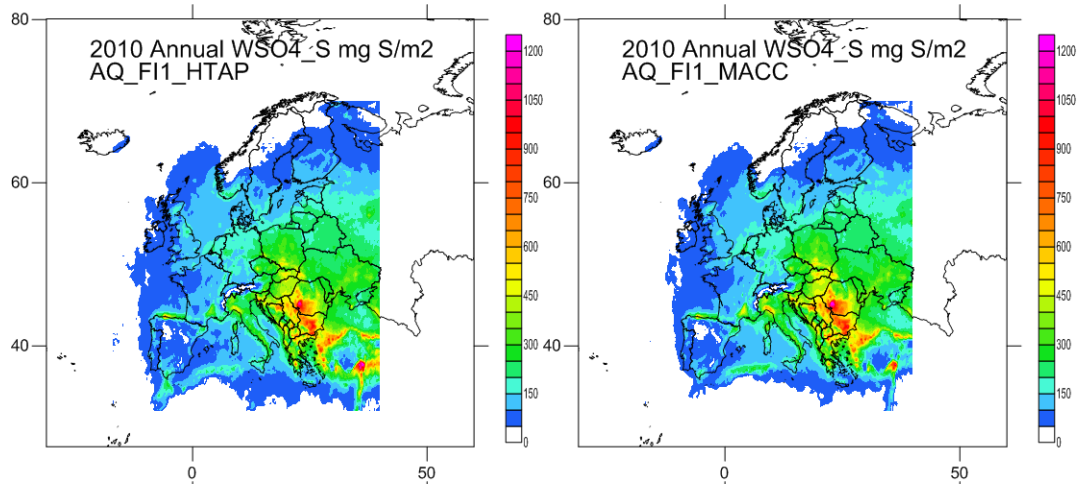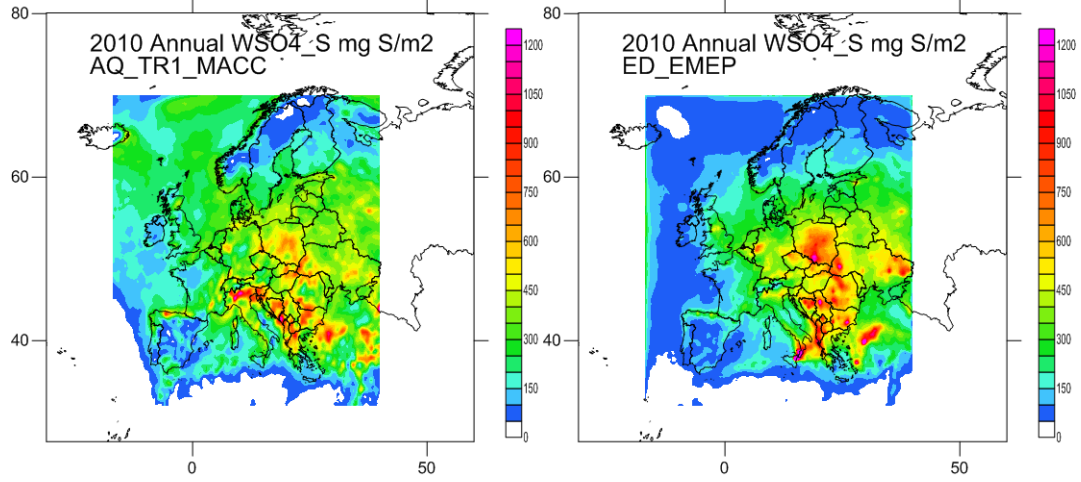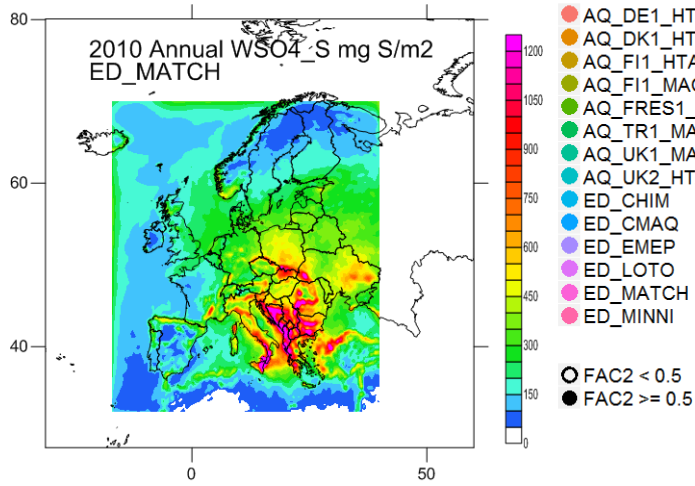

- AQ\_DE1\_HTAP
- AQ\_DK1\_HTAP
- AQ\_FI1\_HTAP
- AQ\_FI1\_MACC
- AQ\_FRES1\_HTAP
- AQ\_TR1\_MACC
- AQ\_UK1\_MACC
- AQ\_UK2\_HTAP
- ED\_CHIM
- ED\_CMAQ
- ED\_EMEP
- ED\_LOTO
- ED\_MATCH
- ED\_MINNI

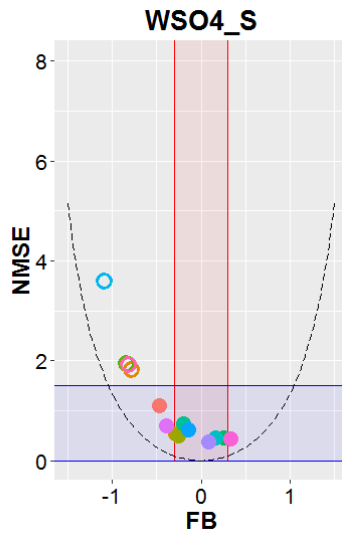

## **S2. MAPS OF DRY DEPOSITION FOR DIFFERENT COMPOUNDS**

## S2.1 Annual deposition of DNH4\_N

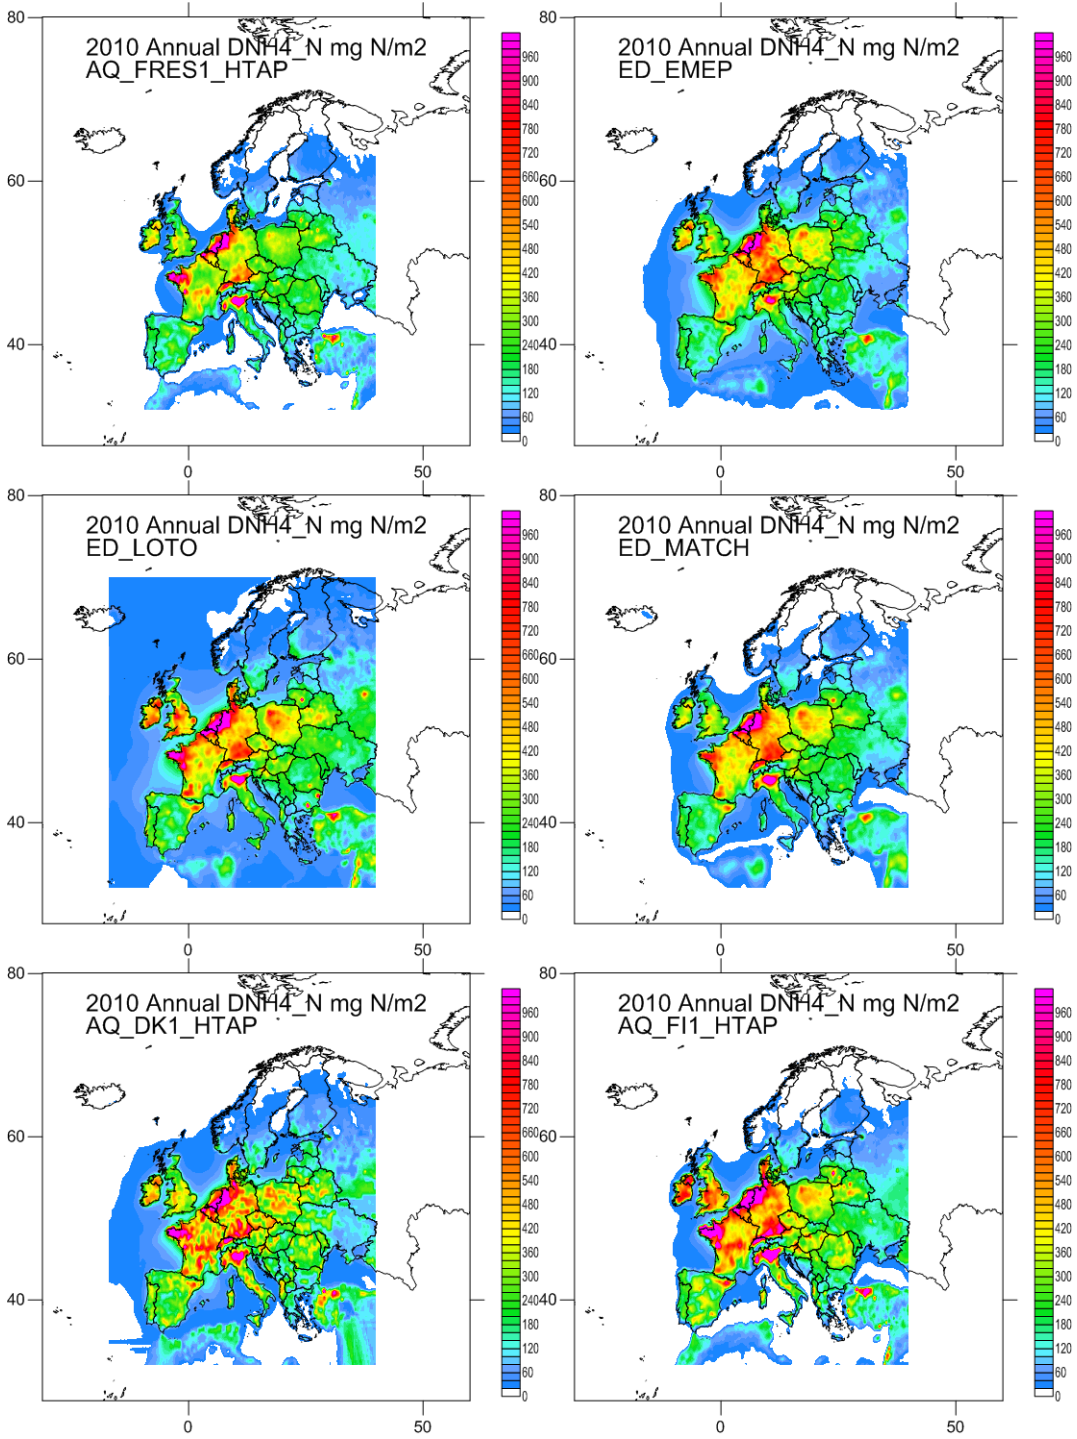



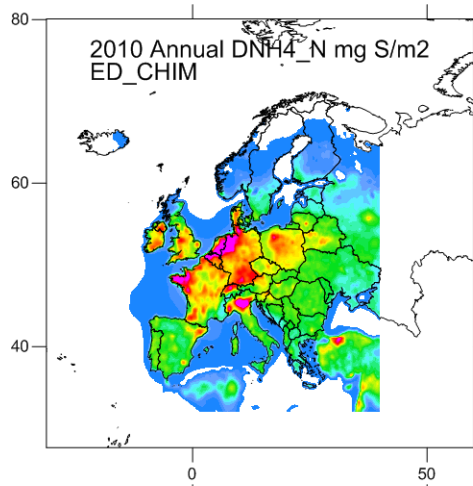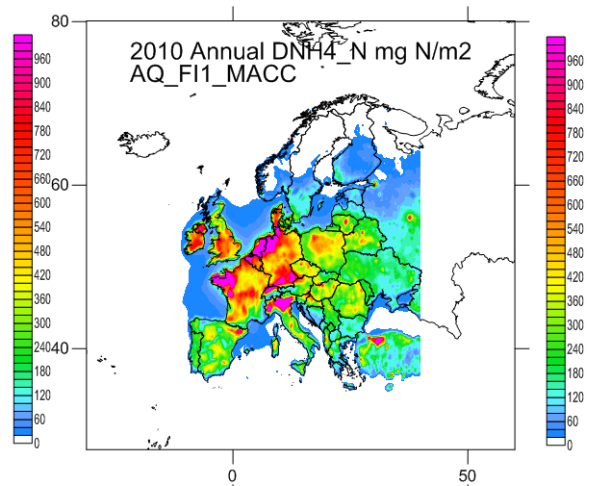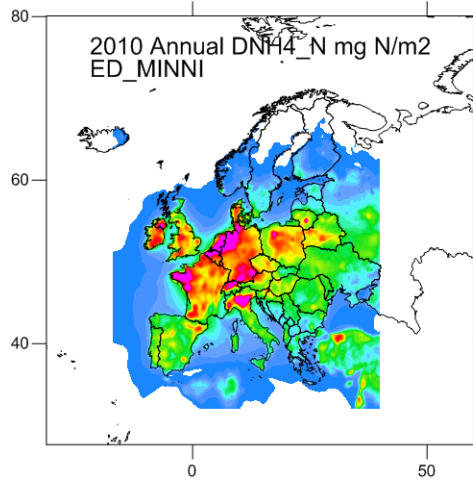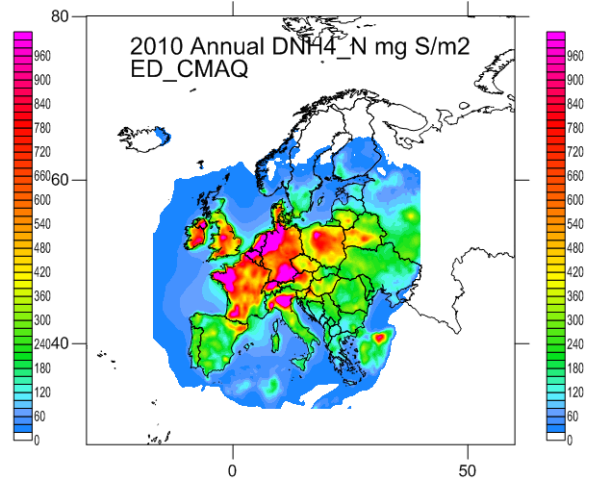

## S2.2 Annual deposition of DNO3\_N

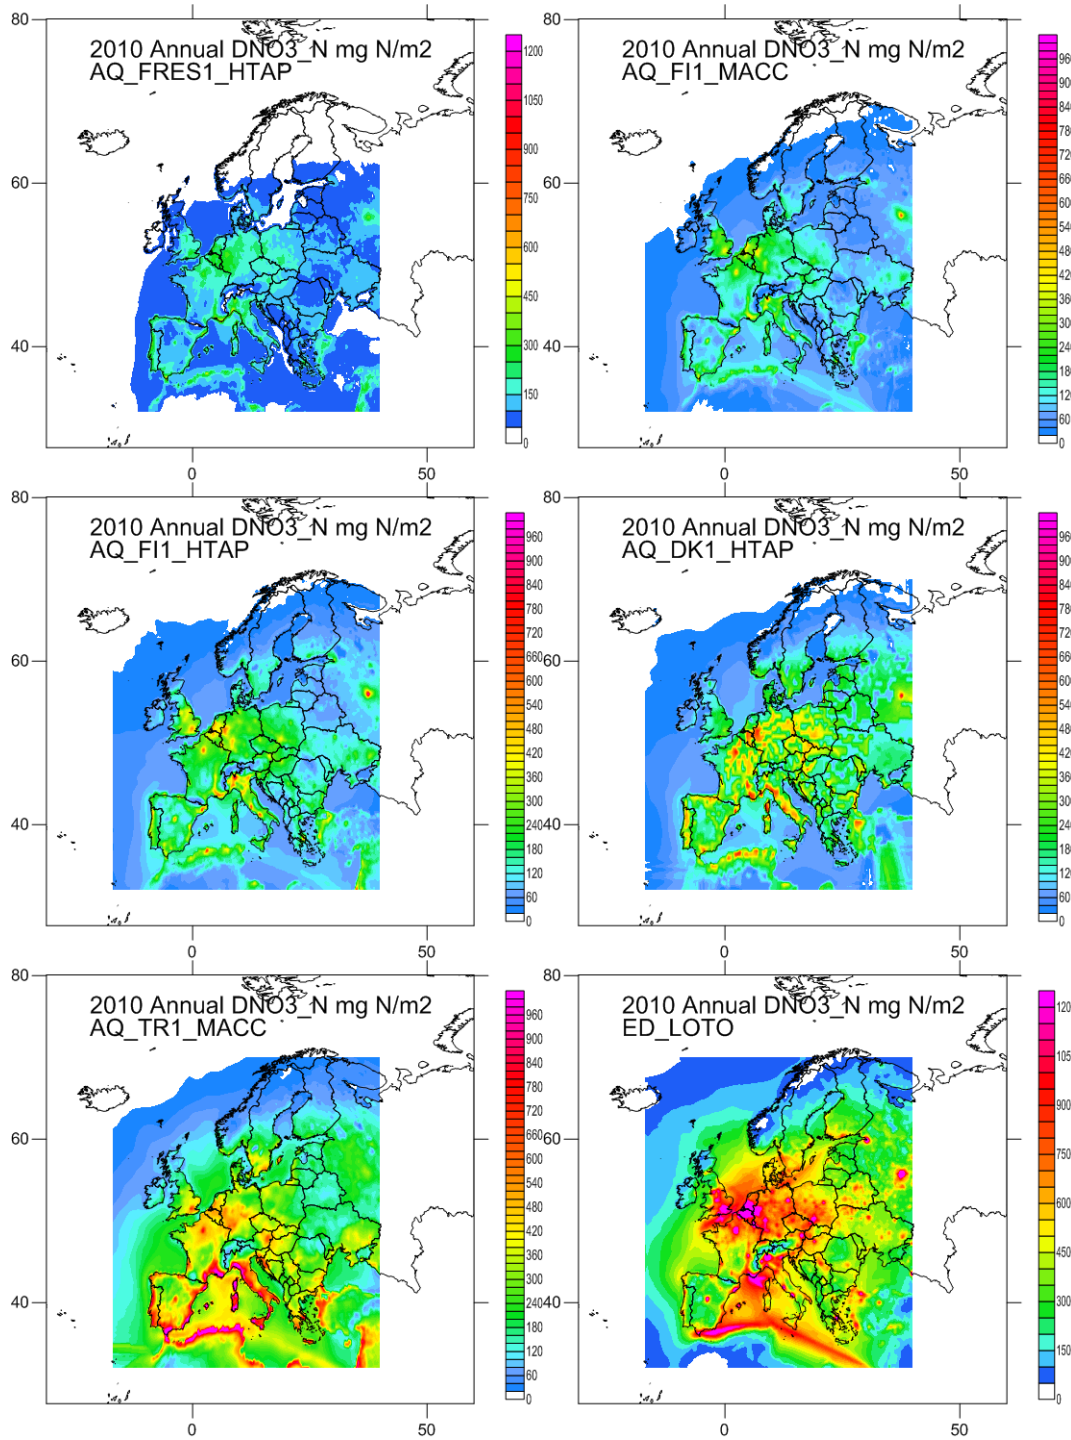

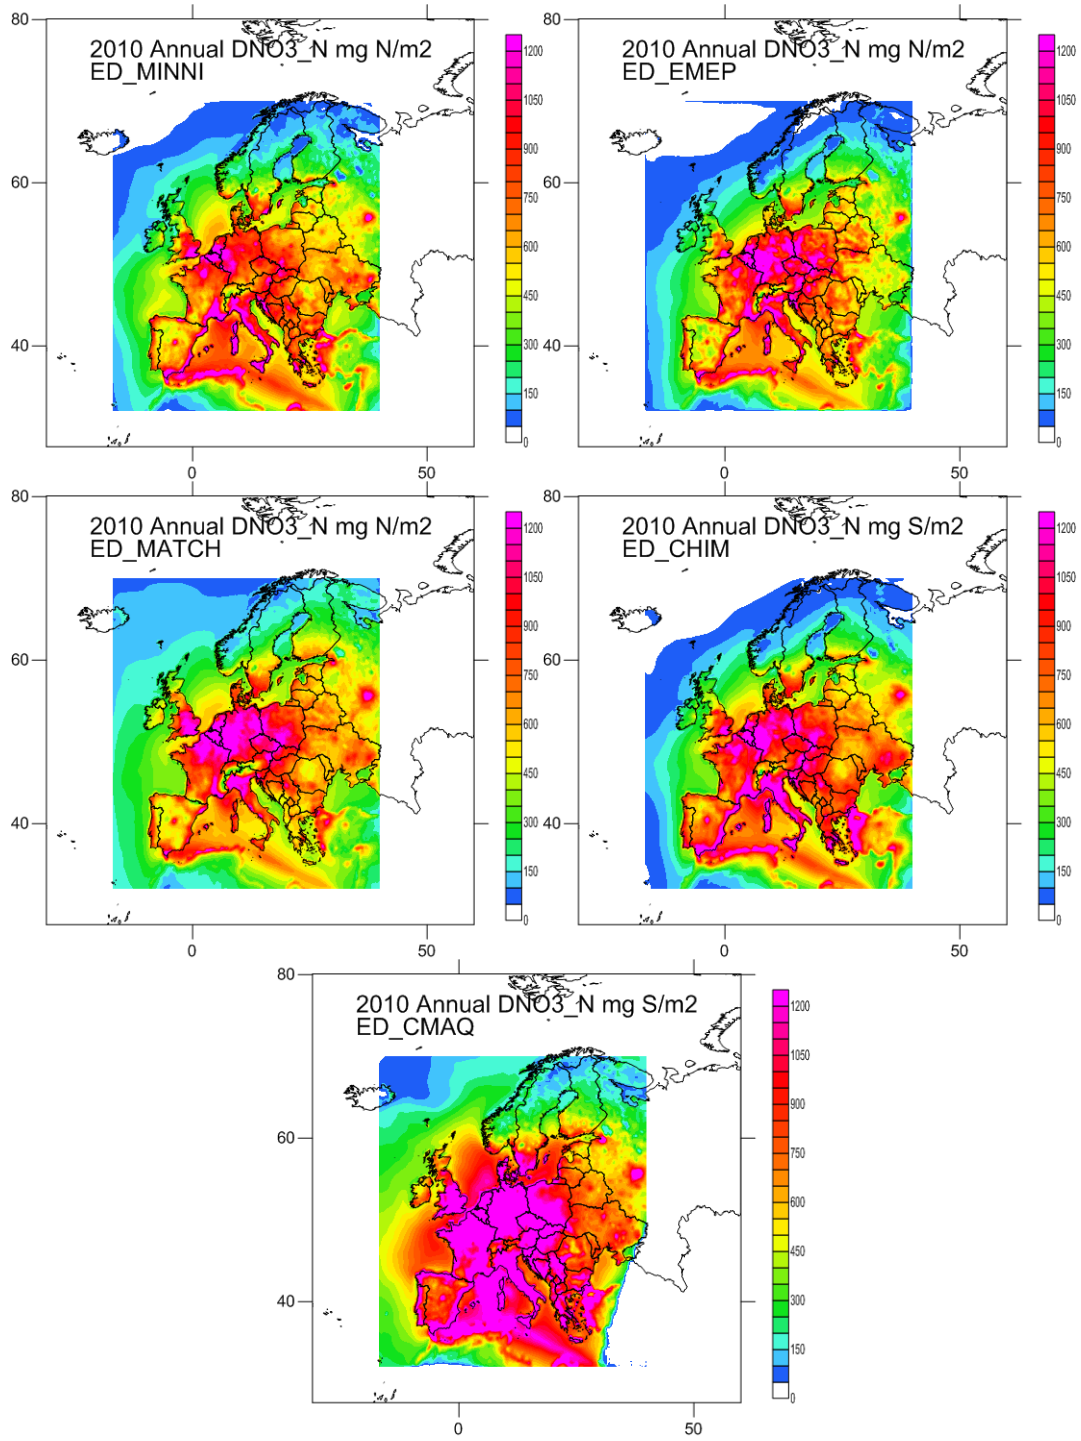

### S2.3 Annual dry deposition of the gas and particle components contributing to DNO3\_N

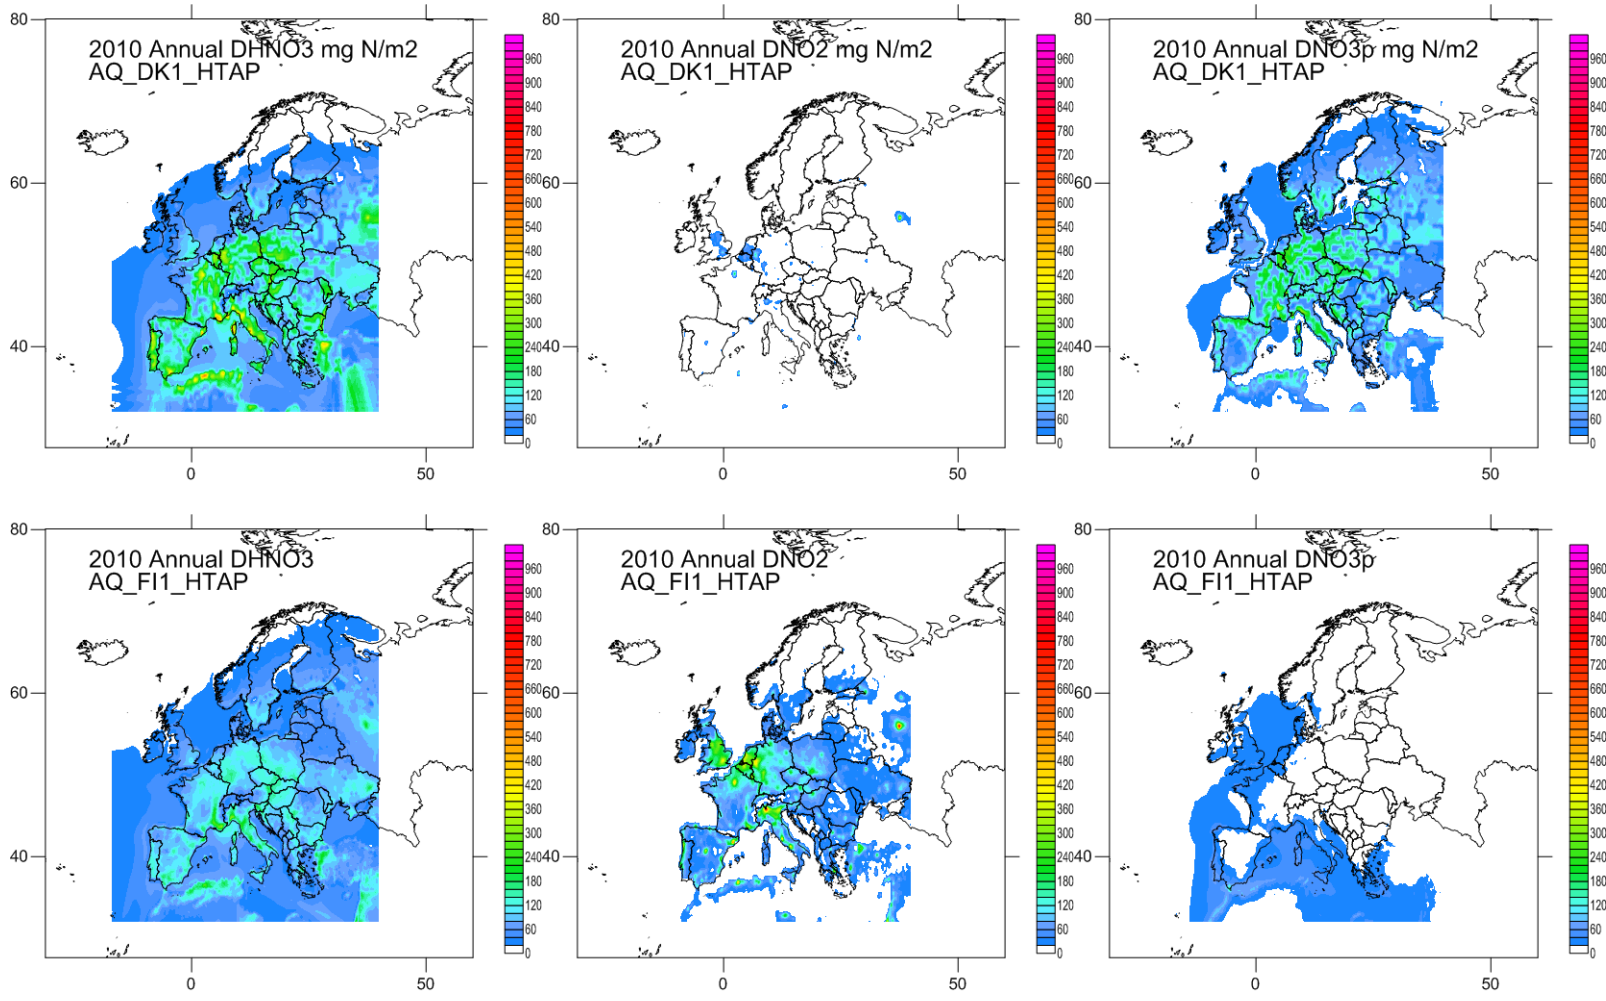

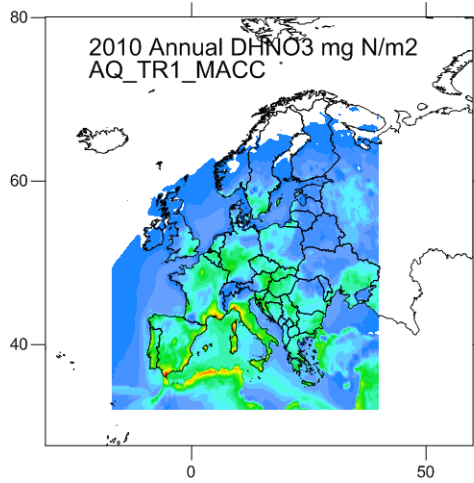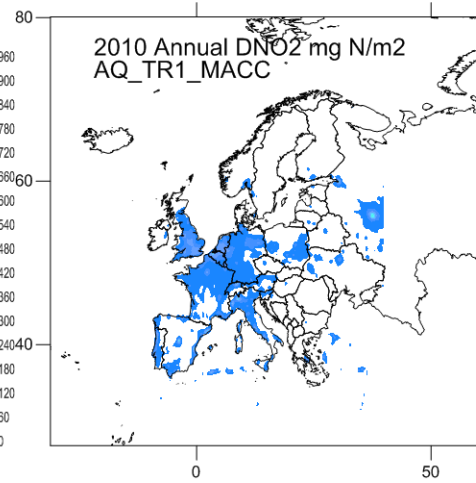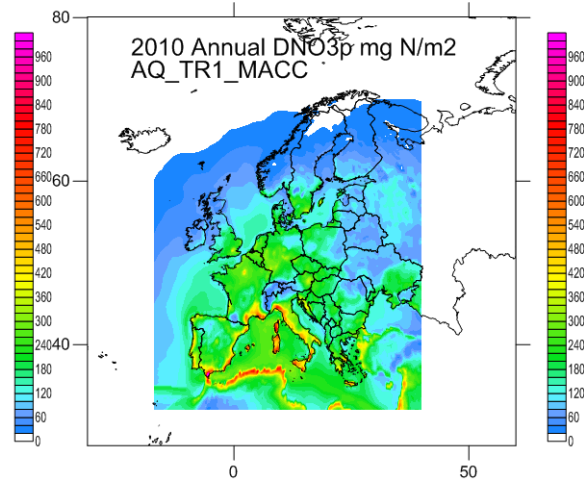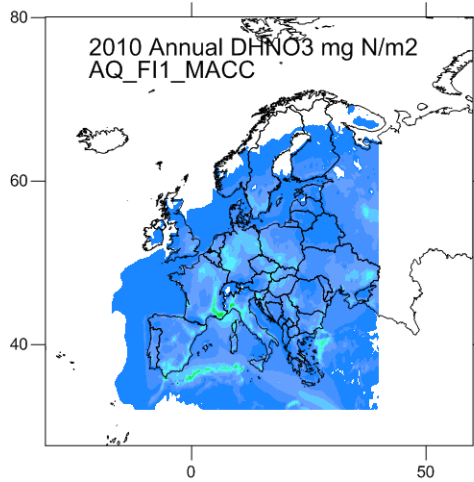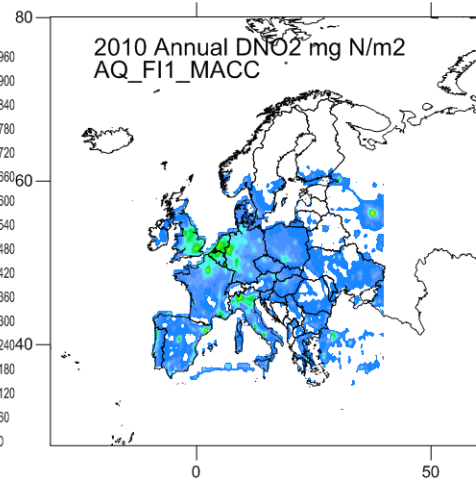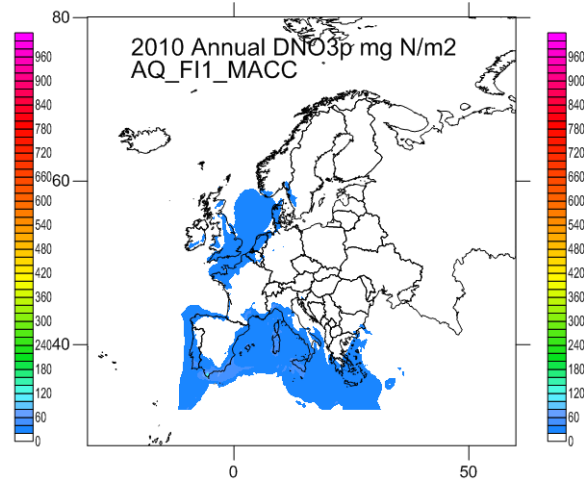

## S2.4 Annual deposition of total dry N (DNH4\_N + DNO3\_N)

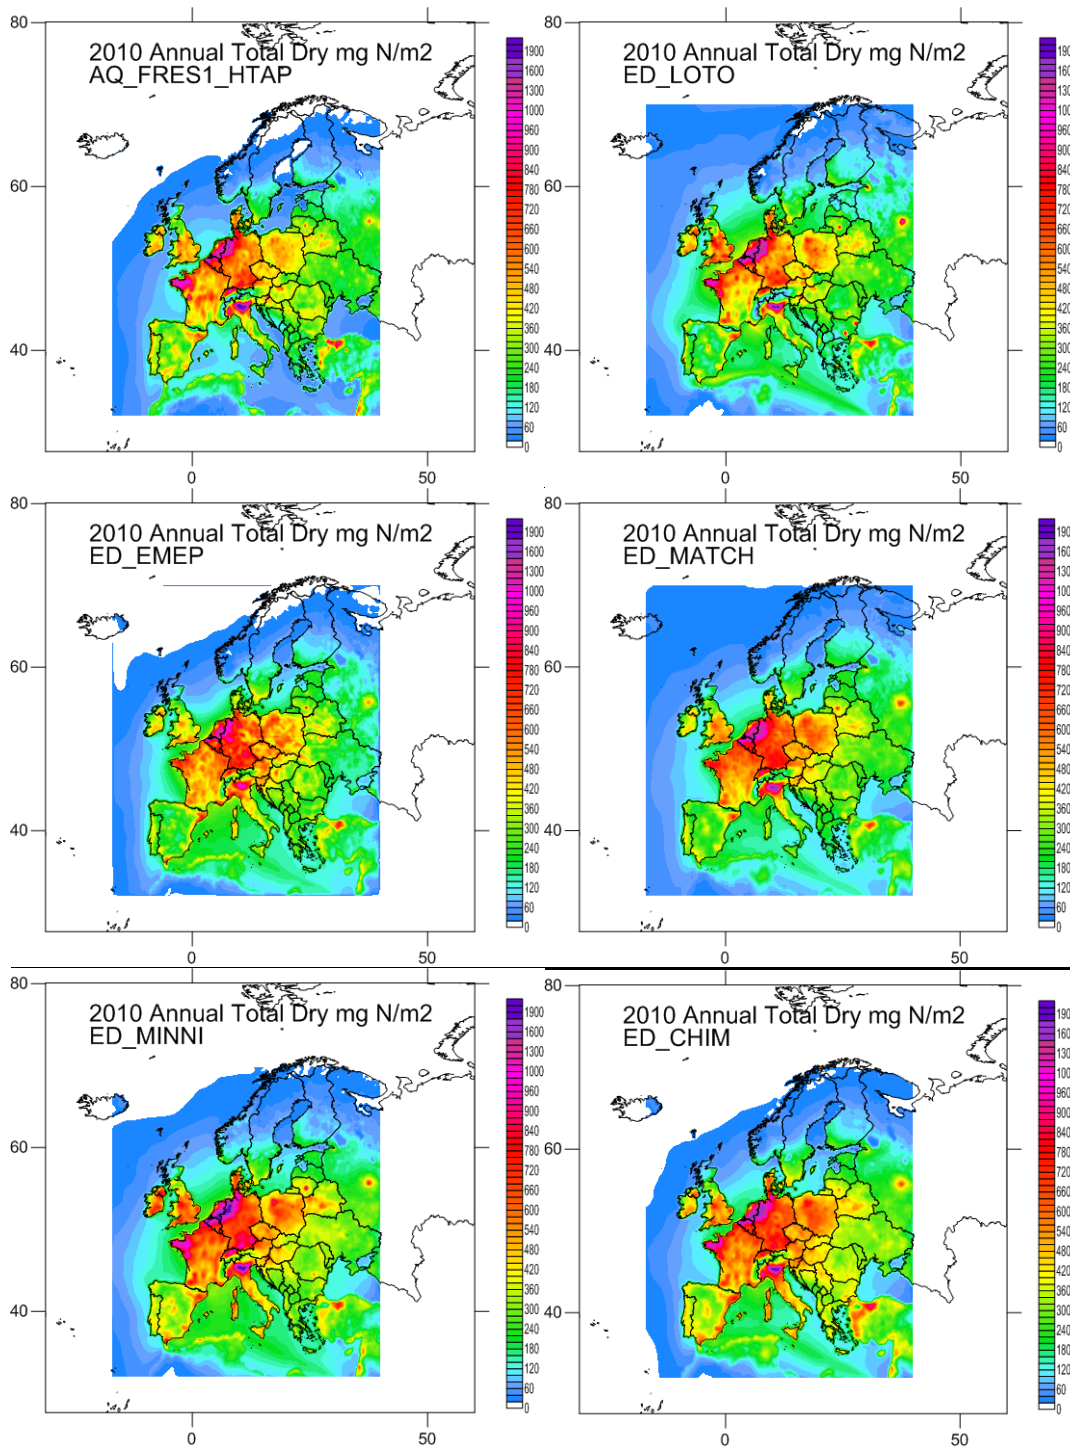

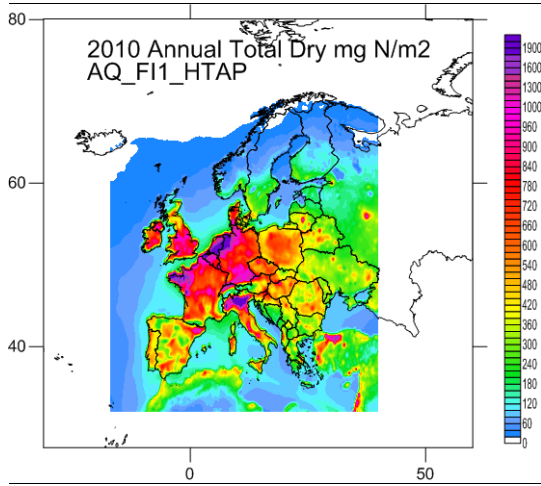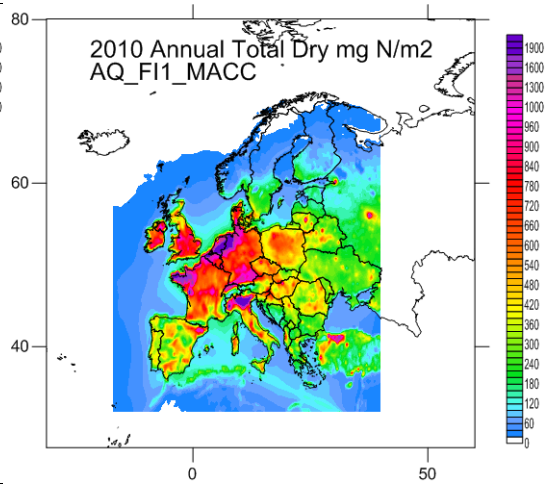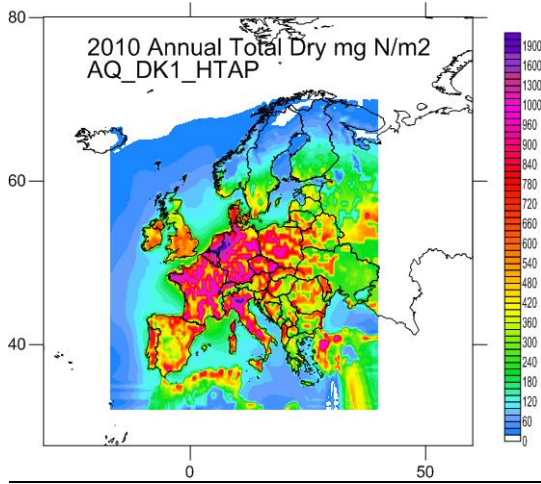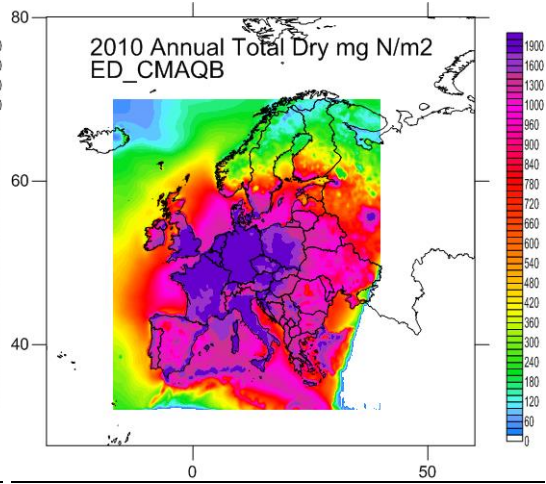

## S2.5 Annual deposition of DSO4\_S

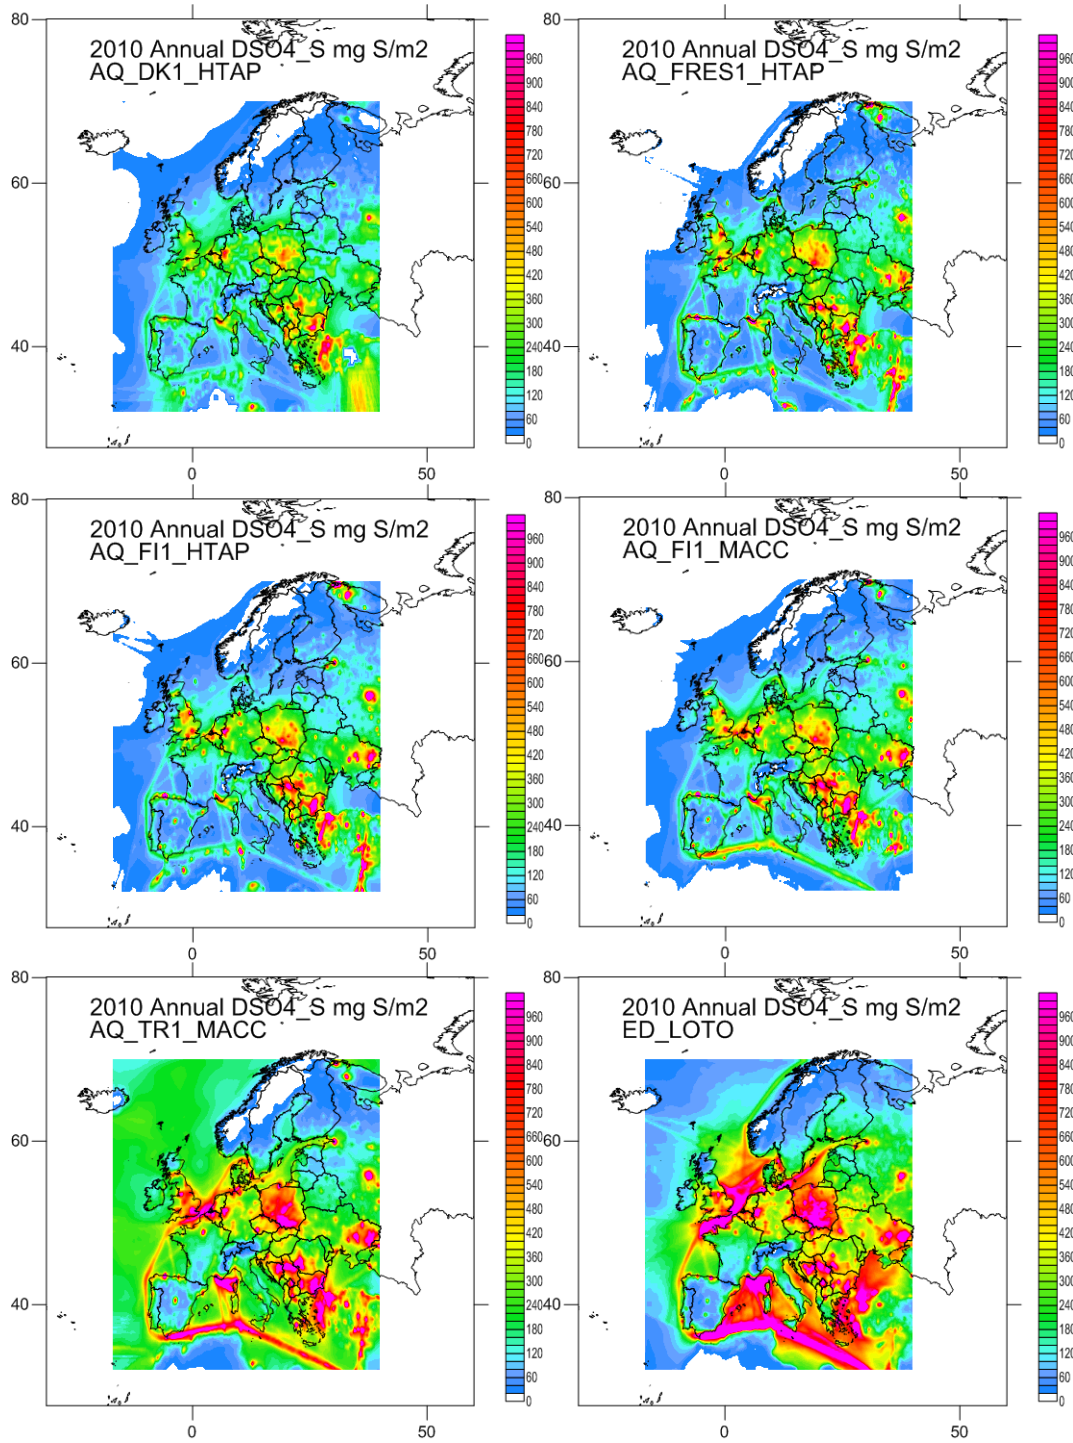



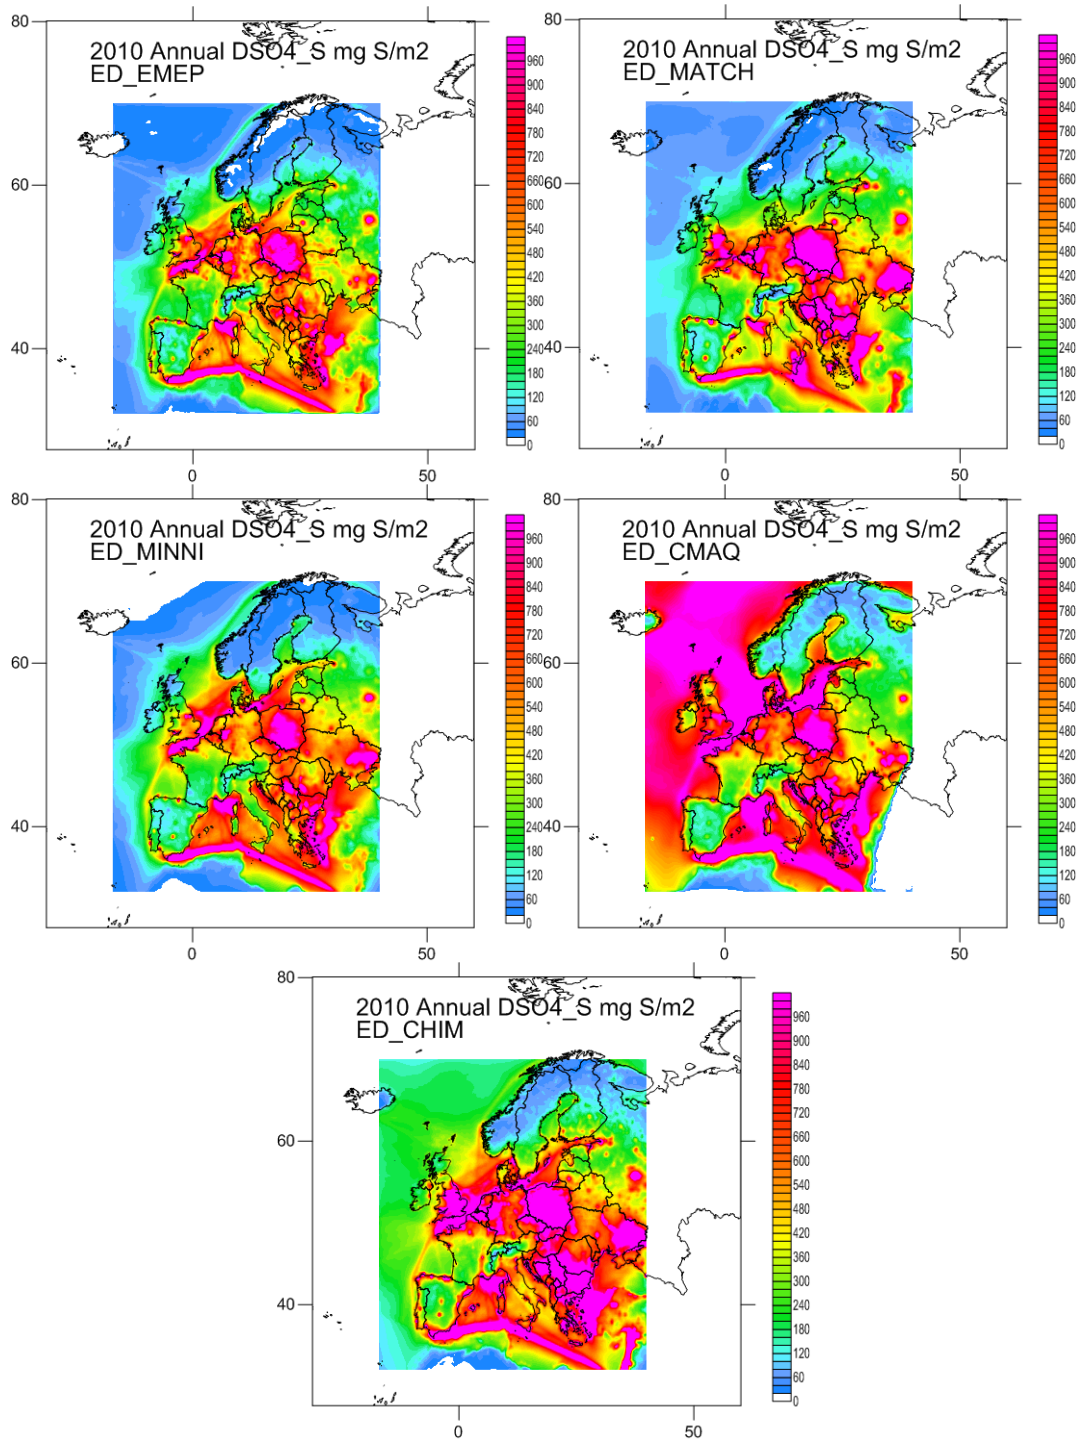

### **S3. STATISTICS FOR WET DEPOSITION FOR DIFFERENT COMPOUNDS**

### S3.1 STATISTICS FROM MONTHLY VALUES (FB, NMSE and FAC2)

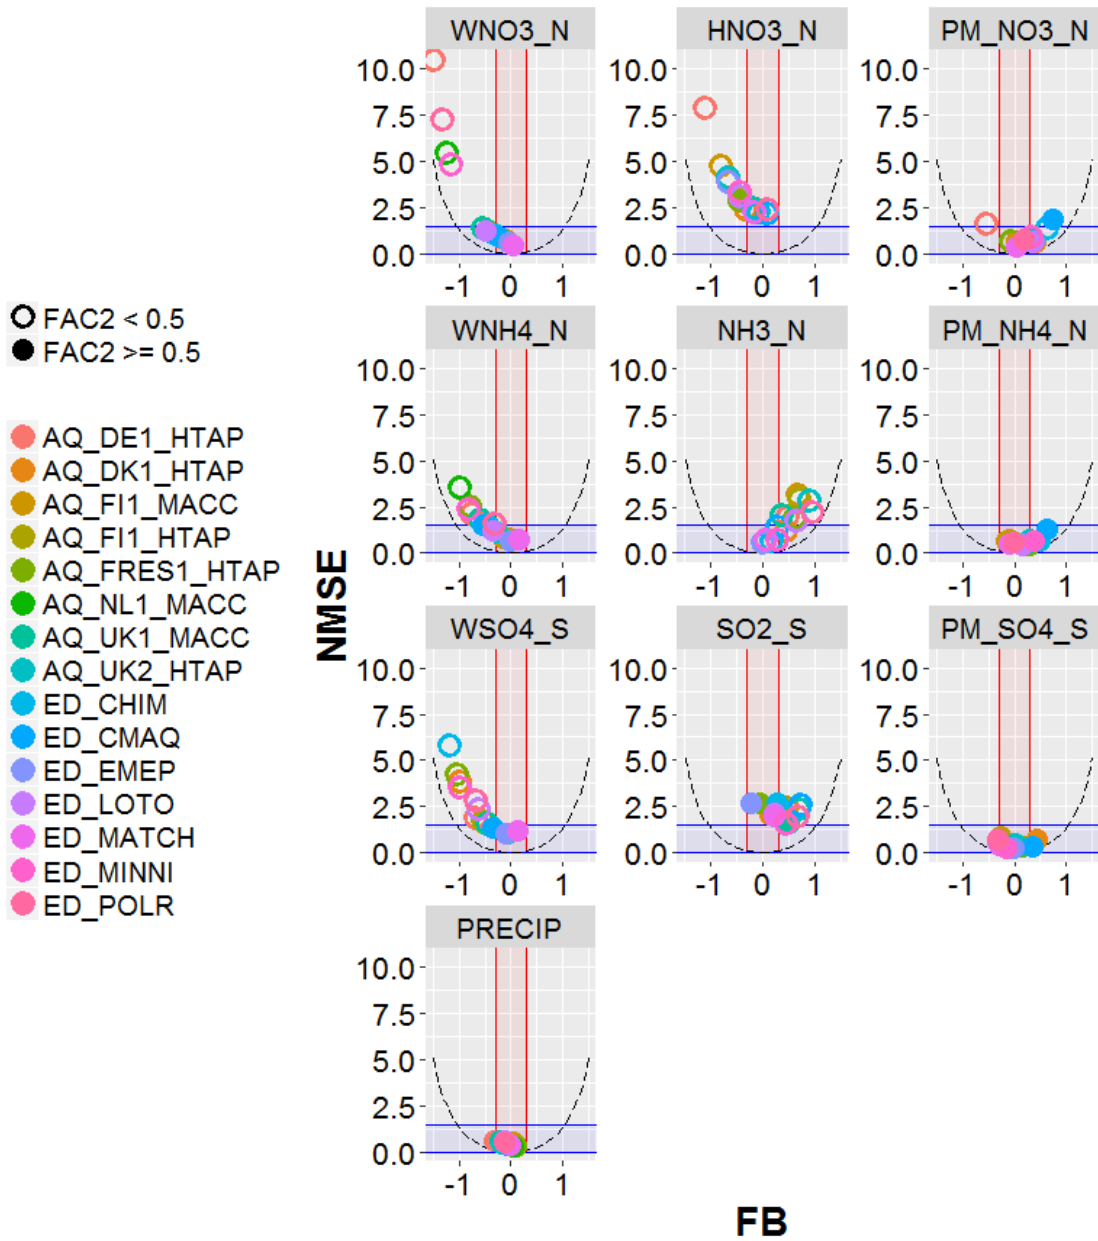

## S3.2 STATISTICS BY MONTH (FB, NMSE and FAC2) FOR OXIDISED-N SPECIES

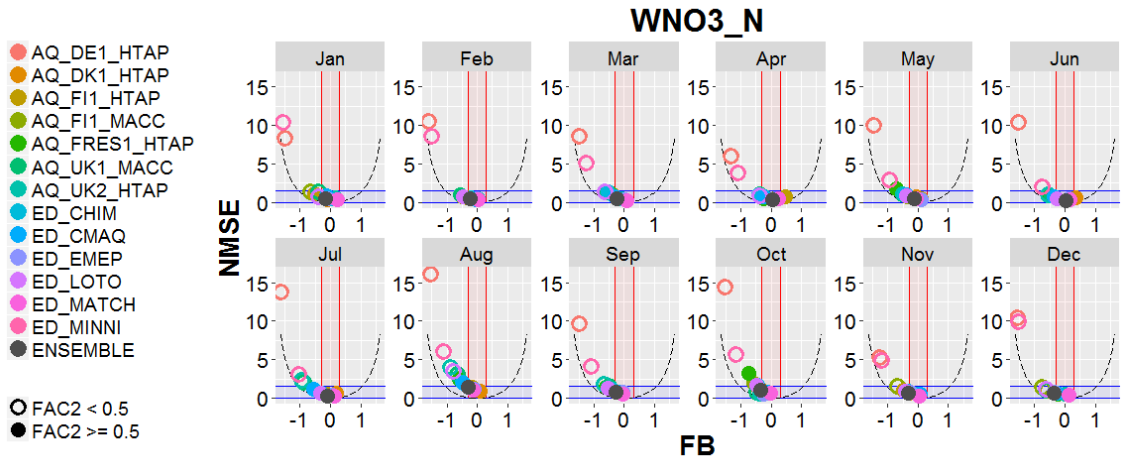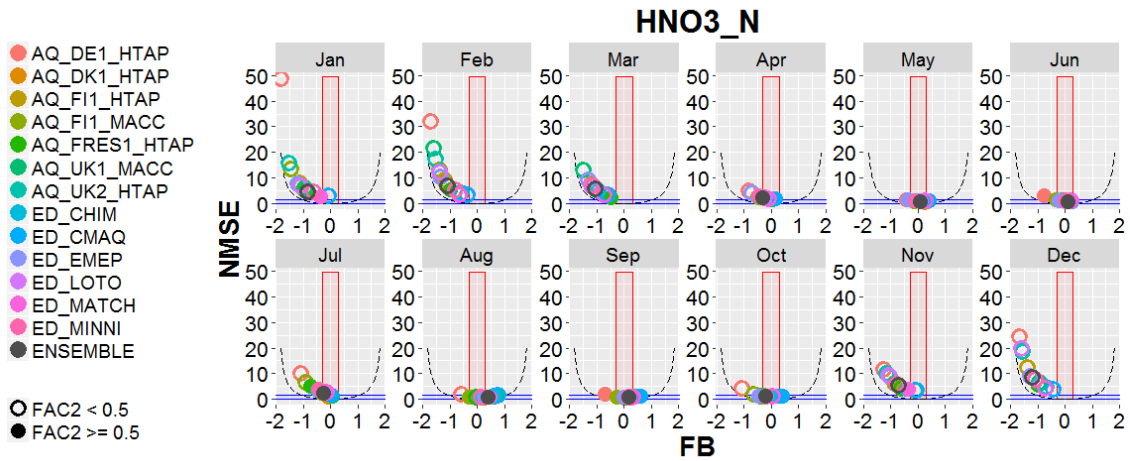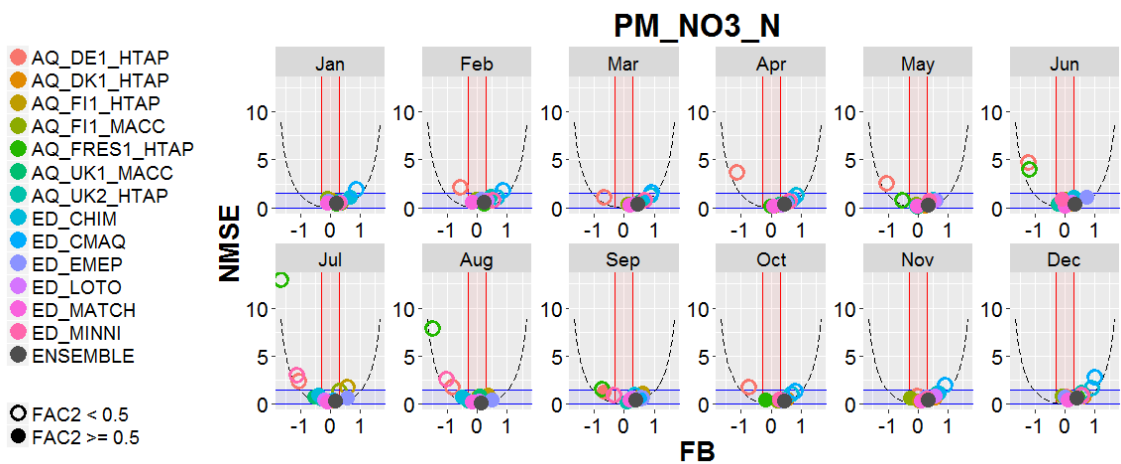

### S3.3 STATISTICS BY MONTH (FB, NMSE and FAC2) FOR REDUCED-N SPECIES

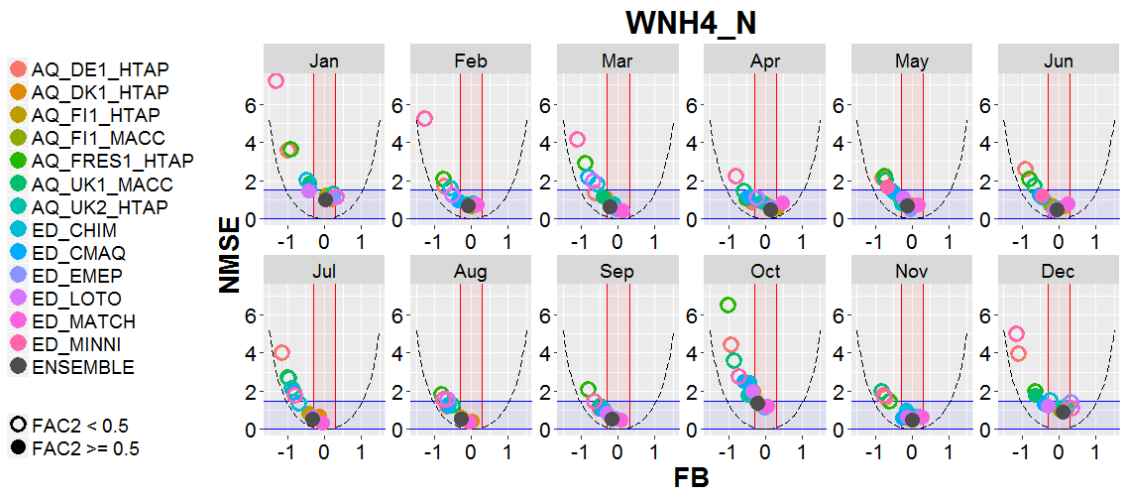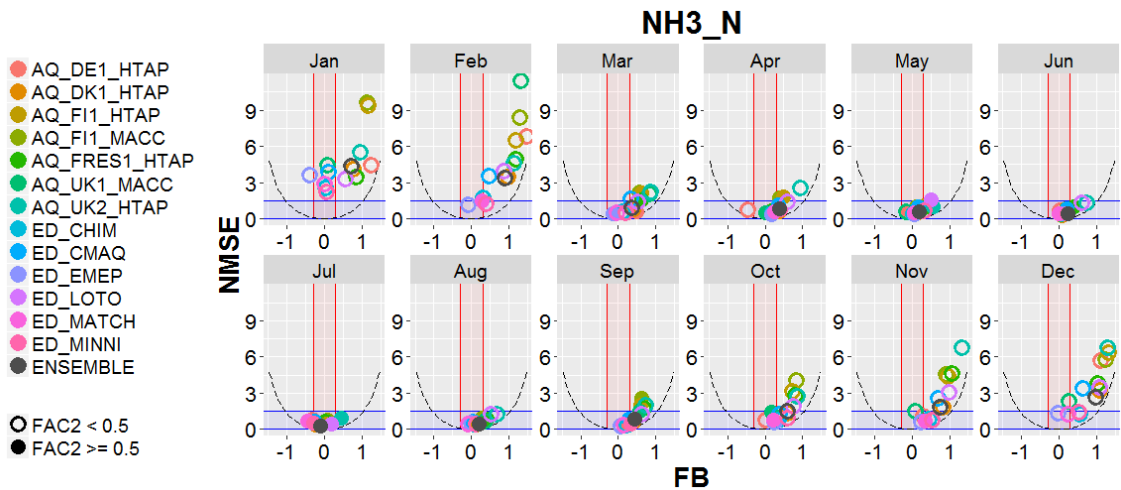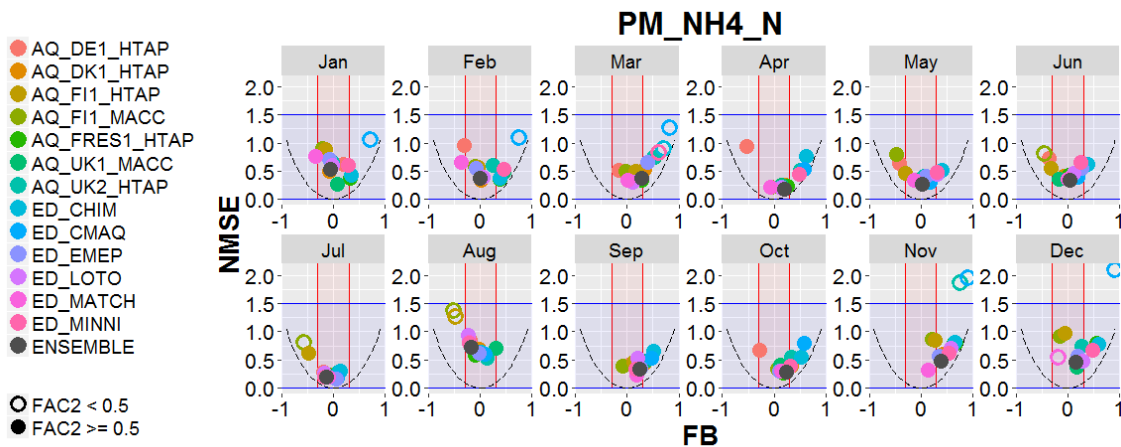

### S3.4 Statistics by month (FB, NMSE and FAC2) for S species

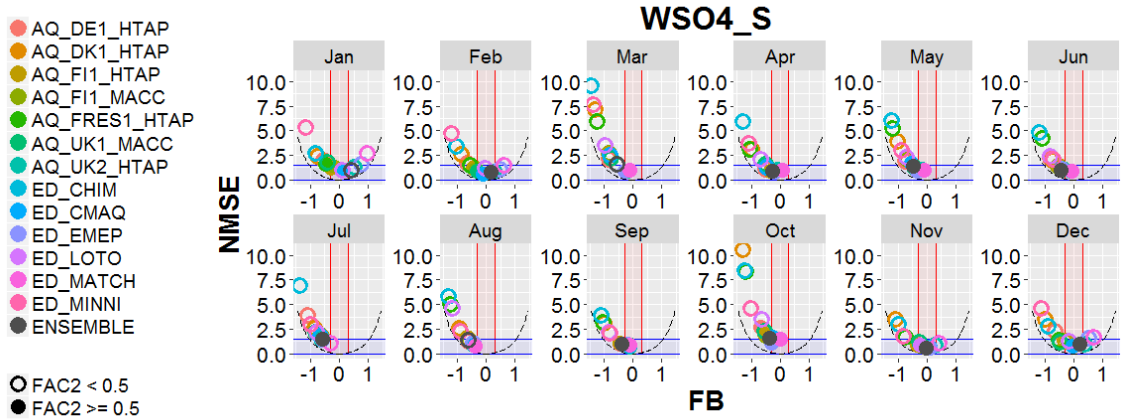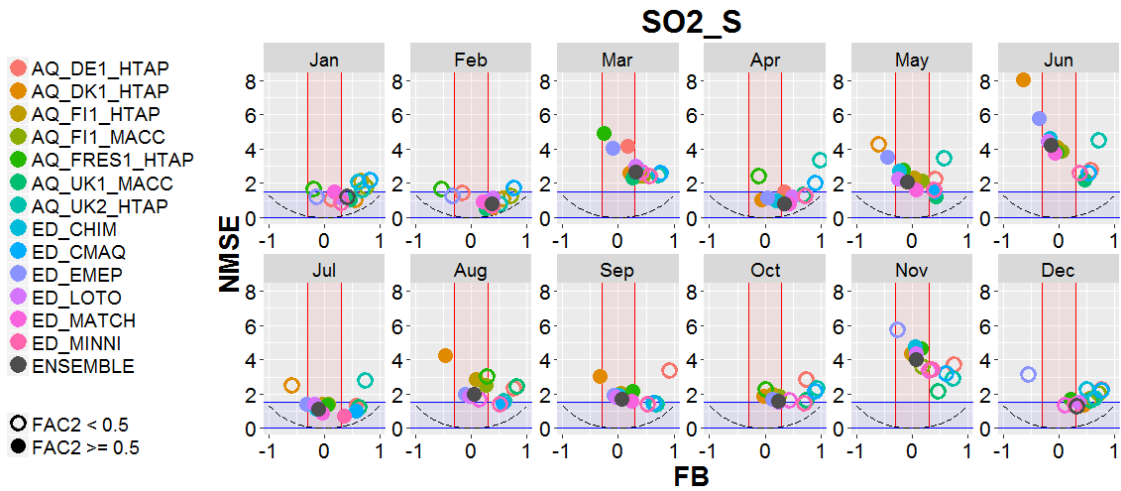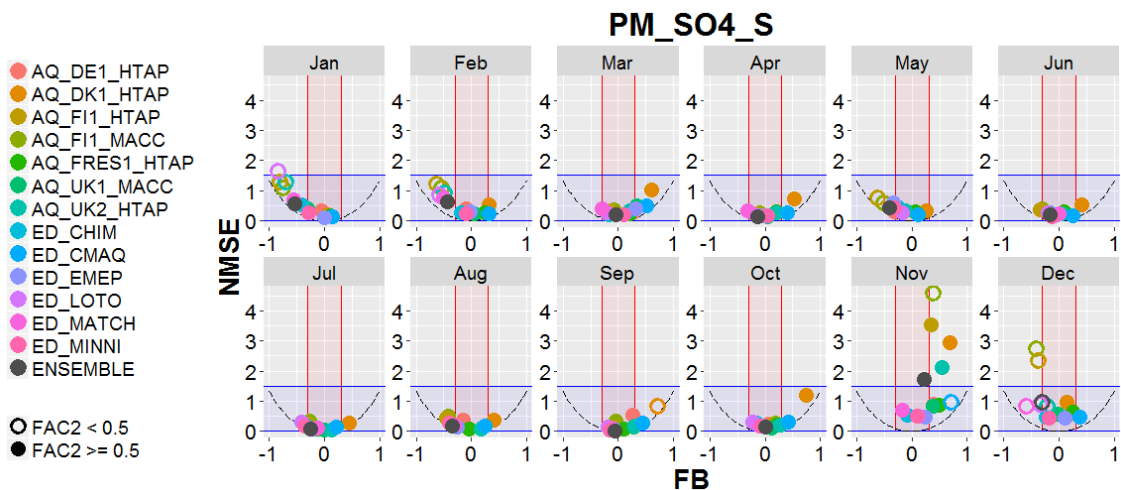

### S3.5 Statistics by month (FB, NMSE and FAC2) for precipitation

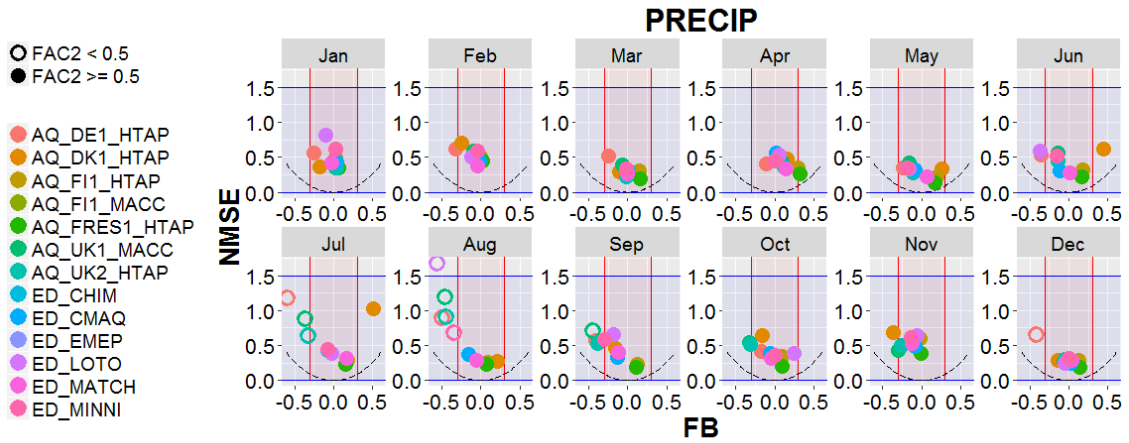

### S3.6 . Tables with complete statistics from monthly values (definition in S3.10). All available sites

| Variable | Model         | n   | FAC2 | FB    | NMSE  | MB     | MGE   | NMB   | NMGE | RMSE  | r    | COE   | IOA  |
|----------|---------------|-----|------|-------|-------|--------|-------|-------|------|-------|------|-------|------|
| WNO3_N   | AQ_DE1_HTAP   | 667 | 0.05 | -1.50 | 10.50 | -19.77 | 19.86 | -0.86 | 0.86 | 28.43 | 0.54 | -0.38 | 0.31 |
| WNO3_N   | AQ_DK1_HTAP   | 682 | 0.67 | -0.10 | 0.78  | -2.25  | 11.74 | -0.10 | 0.51 | 19.10 | 0.54 | 0.18  | 0.59 |
| WNO3_N   | AQ_FI1_MACC   | 694 | 0.53 | -0.47 | 1.26  | -8.52  | 12.15 | -0.38 | 0.54 | 20.01 | 0.55 | 0.15  | 0.57 |
| WNO3_N   | AQ_FI1_HTAP   | 694 | 0.63 | -0.13 | 0.80  | -2.79  | 11.65 | -0.12 | 0.52 | 18.87 | 0.56 | 0.18  | 0.59 |
| WNO3_N   | AQ_FRES1_HTAP | 694 | 0.64 | -0.46 | 1.31  | -8.38  | 11.53 | -0.37 | 0.51 | 20.47 | 0.53 | 0.19  | 0.59 |
| WNO3_N   | AQ_UK1_MACC   | 694 | 0.47 | -0.54 | 1.42  | -9.58  | 12.66 | -0.42 | 0.56 | 20.42 | 0.56 | 0.11  | 0.56 |
| WNO3_N   | AQ_UK2_HTAP   | 680 | 0.59 | -0.32 | 1.06  | -6.37  | 12.14 | -0.28 | 0.53 | 20.00 | 0.52 | 0.15  | 0.58 |
| WNO3_N   | ED_CHIM       | 682 | 0.70 | -0.36 | 1.07  | -6.93  | 11.11 | -0.30 | 0.49 | 19.73 | 0.54 | 0.22  | 0.61 |
| WNO3_N   | ED_CMAQ       | 682 | 0.69 | -0.25 | 0.91  | -5.01  | 10.97 | -0.22 | 0.48 | 19.24 | 0.53 | 0.23  | 0.62 |
| WNO3_N   | ED_EMEP       | 682 | 0.68 | -0.05 | 0.64  | -1.08  | 11.41 | -0.05 | 0.50 | 17.82 | 0.60 | 0.20  | 0.60 |
| WNO3_N   | ED_LOTO       | 682 | 0.54 | -0.48 | 1.26  | -8.83  | 12.20 | -0.39 | 0.53 | 20.09 | 0.56 | 0.15  | 0.57 |
| WNO3_N   | ED_MATCH      | 682 | 0.75 | 0.05  | 0.49  | 1.21   | 10.20 | 0.05  | 0.45 | 16.41 | 0.67 | 0.29  | 0.64 |
| WNO3_N   | ED_MINNI      | 682 | 0.16 | -1.16 | 4.84  | -16.79 | 17.34 | -0.74 | 0.76 | 25.85 | 0.48 | -0.21 | 0.39 |
| WNO3_N   | ENSEMBLE      | 682 | 0.79 | -0.20 | 0.66  | -4.18  | 9.44  | -0.18 | 0.41 | 16.81 | 0.68 | 0.34  | 0.67 |
| HNO3_N   | AQ_DE1_HTAP   | 166 | 0.23 | -1.11 | 7.94  | -0.10  | 0.11  | -0.71 | 0.83 | 0.20  | 0.12 | 0.04  | 0.52 |
| HNO3_N   | AQ_DK1_HTAP   | 154 | 0.49 | -0.35 | 2.42  | -0.04  | 0.11  | -0.30 | 0.78 | 0.18  | 0.35 | 0.11  | 0.56 |
| HNO3_N   | AQ_FI1_MACC   | 166 | 0.40 | -0.80 | 4.79  | -0.08  | 0.10  | -0.57 | 0.78 | 0.19  | 0.19 | 0.10  | 0.55 |
| HNO3_N   | AQ_FI1_HTAP   | 166 | 0.43 | -0.41 | 2.87  | -0.05  | 0.11  | -0.34 | 0.80 | 0.18  | 0.22 | 0.09  | 0.54 |
| HNO3_N   | AQ_FRES1_HTAP | 166 | 0.50 | -0.47 | 2.93  | -0.05  | 0.10  | -0.38 | 0.74 | 0.18  | 0.25 | 0.15  | 0.58 |
| HNO3_N   | AQ_UK1_MACC   | 154 | 0.45 | -0.21 | 2.50  | -0.03  | 0.12  | -0.19 | 0.89 | 0.20  | 0.20 | 0.00  | 0.50 |
| HNO3_N   | AQ_UK2_HTAP   | 154 | 0.38 | -0.67 | 4.14  | -0.07  | 0.12  | -0.50 | 0.85 | 0.20  | 0.14 | 0.04  | 0.52 |
| HNO3_N   | ED_CHIM       | 154 | 0.49 | -0.09 | 2.30  | -0.01  | 0.13  | -0.09 | 0.92 | 0.20  | 0.15 | -0.04 | 0.48 |
| HNO3_N   | ED_CMAQ       | 154 | 0.48 | 0.09  | 2.15  | 0.01   | 0.13  | 0.09  | 0.96 | 0.21  | 0.14 | -0.09 | 0.45 |
| HNO3_N   | ED_EMEP       | 154 | 0.38 | -0.67 | 3.92  | -0.07  | 0.11  | -0.50 | 0.81 | 0.19  | 0.22 | 0.08  | 0.54 |
| HNO3_N   | ED_LOTO       | 154 | 0.42 | -0.44 | 3.16  | -0.05  | 0.11  | -0.36 | 0.83 | 0.20  | 0.15 | 0.06  | 0.53 |



| Variable | Model         | n   | FAC2 | FB    | NMSE | MB     | MGE   | NMB   | NMGE | RMSE  | r    | COE   | IOA   |
|----------|---------------|-----|------|-------|------|--------|-------|-------|------|-------|------|-------|-------|
| HNO3_N   | ED_MATCH      | 154 | 0.42 | -0.16 | 2.24 | -0.02  | 0.12  | -0.15 | 0.88 | 0.19  | 0.15 | 0.00  | 0.50  |
| HNO3_N   | ED_MINNI      | 154 | 0.40 | -0.45 | 3.37 | -0.05  | 0.12  | -0.37 | 0.87 | 0.20  | 0.06 | 0.02  | 0.51  |
| HNO3_N   | ENSEMBLE      | 154 | 0.50 | -0.40 | 2.76 | -0.05  | 0.11  | -0.33 | 0.80 | 0.19  | 0.23 | 0.09  | 0.55  |
| PM_NO3_N | AQ_DE1_HTAP   | 393 | 0.37 | -0.55 | 1.61 | -0.14  | 0.23  | -0.43 | 0.68 | 0.32  | 0.43 | -0.10 | 0.45  |
| PM_NO3_N | AQ_DK1_HTAP   | 382 | 0.64 | 0.40  | 0.59 | 0.16   | 0.22  | 0.50  | 0.67 | 0.31  | 0.68 | -0.06 | 0.47  |
| PM_NO3_N | AQ_FI1_MACC   | 393 | 0.63 | 0.05  | 0.70 | 0.02   | 0.18  | 0.05  | 0.56 | 0.28  | 0.53 | 0.10  | 0.55  |
| PM_NO3_N | AQ_FI1_HTAP   | 393 | 0.64 | 0.32  | 0.76 | 0.13   | 0.23  | 0.39  | 0.70 | 0.34  | 0.54 | -0.12 | 0.44  |
| PM_NO3_N | AQ_FRES1_HTAP | 393 | 0.44 | -0.08 | 0.68 | -0.03  | 0.19  | -0.08 | 0.58 | 0.26  | 0.71 | 0.07  | 0.53  |
| PM_NO3_N | AQ_UK1_MACC   | 382 | 0.68 | 0.29  | 0.68 | 0.11   | 0.20  | 0.35  | 0.63 | 0.31  | 0.66 | 0.01  | 0.50  |
| PM_NO3_N | AQ_UK2_HTAP   | 370 | 0.66 | 0.35  | 0.90 | 0.14   | 0.24  | 0.42  | 0.71 | 0.38  | 0.65 | -0.14 | 0.43  |
| PM_NO3_N | ED_CHIM       | 382 | 0.46 | 0.62  | 1.38 | 0.29   | 0.37  | 0.90  | 1.12 | 0.53  | 0.68 | -0.78 | 0.11  |
| PM_NO3_N | ED_CMAQ       | 382 | 0.50 | 0.74  | 1.85 | 0.39   | 0.41  | 1.19  | 1.27 | 0.66  | 0.67 | -1.02 | -0.01 |
| PM_NO3_N | ED_EMEP       | 382 | 0.62 | 0.37  | 0.66 | 0.15   | 0.23  | 0.45  | 0.69 | 0.32  | 0.58 | -0.10 | 0.45  |
| PM_NO3_N | ED_LOTO       | 382 | 0.67 | 0.34  | 0.64 | 0.13   | 0.21  | 0.41  | 0.63 | 0.31  | 0.68 | 0.00  | 0.50  |
| PM_NO3_N | ED_MATCH      | 382 | 0.76 | 0.04  | 0.39 | 0.01   | 0.14  | 0.04  | 0.43 | 0.21  | 0.74 | 0.32  | 0.66  |
| PM_NO3_N | ED_MINNI      | 382 | 0.45 | 0.32  | 0.91 | 0.12   | 0.26  | 0.37  | 0.79 | 0.36  | 0.63 | -0.25 | 0.37  |
| PM_NO3_N | ENSEMBLE      | 382 | 0.70 | 0.34  | 0.48 | 0.13   | 0.18  | 0.40  | 0.56 | 0.27  | 0.72 | 0.11  | 0.56  |
| WNH4_N   | AQ_DE1_HTAP   | 690 | 0.39 | -0.77 | 2.14 | -15.30 | 17.36 | -0.55 | 0.63 | 26.96 | 0.62 | 0.07  | 0.53  |
| WNH4_N   | AQ_DK1_HTAP   | 704 | 0.59 | -0.03 | 0.84 | -0.91  | 15.54 | -0.03 | 0.58 | 24.17 | 0.53 | 0.16  | 0.58  |
| WNH4_N   | AQ_FI1_MACC   | 715 | 0.59 | -0.16 | 0.82 | -3.87  | 14.39 | -0.14 | 0.54 | 22.39 | 0.60 | 0.23  | 0.61  |
| WNH4_N   | AQ_FI1_HTAP   | 715 | 0.59 | -0.12 | 0.82 | -2.99  | 14.79 | -0.11 | 0.55 | 22.86 | 0.59 | 0.20  | 0.60  |
| WNH4_N   | AQ_FRES1_HTAP | 716 | 0.39 | -0.80 | 2.53 | -15.30 | 17.11 | -0.57 | 0.64 | 27.86 | 0.54 | 0.08  | 0.54  |
| WNH4_N   | AQ_UK1_MACC   | 716 | 0.45 | -0.61 | 1.82 | -12.55 | 16.59 | -0.47 | 0.62 | 26.33 | 0.53 | 0.11  | 0.55  |
| WNH4_N   | AQ_UK2_HTAP   | 714 | 0.53 | -0.26 | 1.11 | -6.25  | 16.12 | -0.23 | 0.60 | 24.73 | 0.51 | 0.13  | 0.57  |
| WNH4_N   | ED_CHIM       | 704 | 0.49 | -0.47 | 1.50 | -10.17 | 16.07 | -0.38 | 0.60 | 25.86 | 0.49 | 0.14  | 0.57  |
| WNH4_N   | ED_CMAQ       | 704 | 0.55 | -0.55 | 1.55 | -11.62 | 14.81 | -0.43 | 0.55 | 25.12 | 0.59 | 0.20  | 0.60  |
| WNH4_N   | ED_EMEP       | 704 | 0.63 | -0.01 | 0.67 | -0.29  | 14.53 | -0.01 | 0.54 | 21.85 | 0.64 | 0.22  | 0.61  |

| Variable | Model         | n   | FAC2 | FB    | NMSE | MB     | MGE   | NMB   | NMGE | RMSE  | r     | COE   | IOA   |
|----------|---------------|-----|------|-------|------|--------|-------|-------|------|-------|-------|-------|-------|
| WNH4_N   | ED_LOTO       | 704 | 0.54 | -0.35 | 1.21 | -8.06  | 15.00 | -0.30 | 0.56 | 24.65 | 0.53  | 0.19  | 0.60  |
| WNH4_N   | ED_MATCH      | 704 | 0.61 | 0.17  | 0.70 | 4.82   | 16.00 | 0.18  | 0.60 | 24.42 | 0.62  | 0.14  | 0.57  |
| WNH4_N   | ED_MINNI      | 704 | 0.35 | -0.81 | 2.36 | -15.47 | 16.92 | -0.58 | 0.63 | 26.75 | 0.63  | 0.09  | 0.54  |
| WNH4_N   | ENSEMBLE      | 703 | 0.68 | -0.12 | 0.69 | -2.99  | 13.14 | -0.11 | 0.49 | 20.97 | 0.65  | 0.29  | 0.65  |
| NH3_N    | AQ_DE1_HTAP   | 166 | 0.42 | 0.47  | 1.97 | 0.52   | 0.96  | 0.62  | 1.14 | 1.50  | -0.08 | -0.93 | 0.04  |
| NH3_N    | AQ_DK1_HTAP   | 154 | 0.48 | 0.46  | 1.17 | 0.50   | 0.80  | 0.59  | 0.96 | 1.14  | 0.39  | -0.55 | 0.23  |
| NH3_N    | AQ_FI1_MACC   | 166 | 0.43 | 0.66  | 3.14 | 0.83   | 1.21  | 0.98  | 1.43 | 2.10  | 0.32  | -1.41 | -0.17 |
| NH3_N    | AQ_FI1_HTAP   | 166 | 0.49 | 0.69  | 2.92 | 0.88   | 1.16  | 1.04  | 1.38 | 2.06  | 0.34  | -1.32 | -0.14 |
| NH3_N    | AQ_FRES1_HTAP | 166 | 0.45 | 0.62  | 1.92 | 0.76   | 1.06  | 0.90  | 1.26 | 1.61  | 0.40  | -1.11 | -0.05 |
| NH3_N    | AQ_UK1_MACC   | 154 | 0.48 | 0.37  | 2.07 | 0.38   | 0.80  | 0.46  | 0.96 | 1.45  | 0.40  | -0.54 | 0.23  |
| NH3_N    | AQ_UK2_HTAP   | 154 | 0.32 | 0.89  | 2.83 | 1.33   | 1.55  | 1.59  | 1.86 | 2.26  | 0.49  | -2.00 | -0.33 |
| NH3_N    | ED_CHIM       | 154 | 0.44 | 0.16  | 0.69 | 0.14   | 0.60  | 0.17  | 0.72 | 0.75  | 0.52  | -0.16 | 0.42  |
| NH3_N    | ED_CMAQ       | 154 | 0.48 | 0.28  | 1.48 | 0.27   | 0.75  | 0.32  | 0.89 | 1.17  | 0.26  | -0.45 | 0.28  |
| NH3_N    | ED_EMEP       | 154 | 0.48 | 0.01  | 0.59 | 0.01   | 0.52  | 0.01  | 0.62 | 0.64  | 0.53  | 0.00  | 0.50  |
| NH3_N    | ED_LOTO       | 154 | 0.40 | 0.64  | 1.73 | 0.78   | 1.05  | 0.93  | 1.26 | 1.53  | 0.59  | -1.04 | -0.02 |
| NH3_N    | ED_MATCH      | 154 | 0.49 | 0.07  | 0.72 | 0.06   | 0.56  | 0.07  | 0.67 | 0.73  | 0.45  | -0.08 | 0.46  |
| NH3_N    | ED_MINNI      | 154 | 0.40 | 0.29  | 0.75 | 0.28   | 0.68  | 0.34  | 0.82 | 0.84  | 0.48  | -0.32 | 0.34  |
| NH3_N    | ENSEMBLE      | 154 | 0.46 | 0.45  | 1.22 | 0.48   | 0.81  | 0.58  | 0.97 | 1.16  | 0.47  | -0.57 | 0.21  |
| PM_NH4_N | AQ_DE1_HTAP   | 350 | 0.63 | -0.10 | 0.72 | -0.06  | 0.33  | -0.10 | 0.55 | 0.49  | 0.56  | 0.19  | 0.59  |
| PM_NH4_N | AQ_DK1_HTAP   | 339 | 0.73 | 0.14  | 0.45 | 0.09   | 0.30  | 0.15  | 0.49 | 0.44  | 0.69  | 0.30  | 0.65  |
| PM_NH4_N | AQ_FI1_MACC   | 350 | 0.61 | -0.15 | 0.70 | -0.09  | 0.31  | -0.14 | 0.51 | 0.47  | 0.61  | 0.25  | 0.63  |
| PM_NH4_N | AQ_FI1_HTAP   | 350 | 0.64 | -0.03 | 0.64 | -0.02  | 0.32  | -0.03 | 0.52 | 0.48  | 0.60  | 0.23  | 0.62  |
| PM_NH4_N | AQ_FRES1_HTAP | 350 | 0.72 | 0.29  | 0.47 | 0.20   | 0.32  | 0.33  | 0.53 | 0.48  | 0.75  | 0.23  | 0.61  |
| PM_NH4_N | AQ_UK1_MACC   | 339 | 0.71 | 0.23  | 0.51 | 0.16   | 0.31  | 0.27  | 0.52 | 0.49  | 0.74  | 0.25  | 0.63  |
| PM_NH4_N | AQ_UK2_HTAP   | 327 | 0.66 | 0.29  | 0.72 | 0.21   | 0.39  | 0.34  | 0.63 | 0.61  | 0.67  | 0.10  | 0.55  |
| PM_NH4_N | ED_CHIM       | 339 | 0.66 | 0.47  | 0.67 | 0.38   | 0.44  | 0.62  | 0.72 | 0.63  | 0.75  | -0.04 | 0.48  |
| PM_NH4_N | ED_CMAQ       | 339 | 0.56 | 0.63  | 1.29 | 0.56   | 0.61  | 0.92  | 0.99 | 0.96  | 0.73  | -0.43 | 0.28  |

| Variable | Model         | n   | FAC2 | FB    | NMSE | MB     | MGE   | NMB   | NMGE | RMSE  | r    | COE   | IOA  |
|----------|---------------|-----|------|-------|------|--------|-------|-------|------|-------|------|-------|------|
| PM_NH4_N | ED_EMEP       | 339 | 0.72 | 0.13  | 0.54 | 0.09   | 0.31  | 0.14  | 0.50 | 0.48  | 0.66 | 0.27  | 0.64 |
| PM_NH4_N | ED_LOTO       | 339 | 0.74 | 0.14  | 0.46 | 0.09   | 0.30  | 0.15  | 0.49 | 0.44  | 0.70 | 0.30  | 0.65 |
| PM_NH4_N | ED_MATCH      | 339 | 0.73 | -0.10 | 0.48 | -0.06  | 0.26  | -0.10 | 0.43 | 0.40  | 0.73 | 0.37  | 0.69 |
| PM_NH4_N | ED_MINNI      | 339 | 0.66 | 0.36  | 0.65 | 0.27   | 0.38  | 0.44  | 0.62 | 0.59  | 0.69 | 0.10  | 0.55 |
| PM_NH4_N | ENSEMBLE      | 339 | 0.78 | 0.11  | 0.40 | 0.07   | 0.27  | 0.11  | 0.44 | 0.41  | 0.73 | 0.37  | 0.69 |
| WSO4_S   | AQ_DE1_HTAP   | 692 | 0.39 | -0.67 | 1.92 | -13.89 | 17.44 | -0.50 | 0.63 | 26.88 | 0.55 | 0.06  | 0.53 |
| WSO4_S   | AQ_DK1_HTAP   | 704 | 0.30 | -0.99 | 3.89 | -17.75 | 19.47 | -0.66 | 0.73 | 30.67 | 0.42 | -0.05 | 0.48 |
| WSO4_S   | AQ_FI1_MACC   | 715 | 0.47 | -0.51 | 1.65 | -10.82 | 16.64 | -0.40 | 0.62 | 26.60 | 0.46 | 0.10  | 0.55 |
| WSO4_S   | AQ_FI1_HTAP   | 715 | 0.46 | -0.54 | 1.73 | -11.39 | 16.62 | -0.42 | 0.62 | 26.75 | 0.46 | 0.10  | 0.55 |
| WSO4_S   | AQ_FRES1_HTAP | 716 | 0.30 | -1.04 | 4.27 | -18.31 | 19.67 | -0.68 | 0.73 | 31.09 | 0.44 | -0.06 | 0.47 |
| WSO4_S   | AQ_UK1_MACC   | 716 | 0.45 | -0.47 | 1.53 | -10.14 | 16.90 | -0.38 | 0.63 | 26.14 | 0.49 | 0.09  | 0.54 |
| WSO4_S   | AQ_UK2_HTAP   | 714 | 0.51 | -0.08 | 1.03 | -2.05  | 17.58 | -0.08 | 0.65 | 26.18 | 0.43 | 0.05  | 0.53 |
| WSO4_S   | ED_CHIM       | 704 | 0.24 | -1.20 | 5.81 | -20.09 | 20.72 | -0.75 | 0.77 | 32.26 | 0.48 | -0.11 | 0.44 |
| WSO4_S   | ED_CMAQ       | 704 | 0.55 | -0.34 | 1.36 | -7.81  | 15.89 | -0.29 | 0.59 | 26.33 | 0.40 | 0.15  | 0.57 |
| WSO4_S   | ED_EMEP       | 704 | 0.52 | -0.11 | 1.04 | -2.75  | 17.34 | -0.10 | 0.65 | 25.93 | 0.41 | 0.07  | 0.53 |
| WSO4_S   | ED_LOTO       | 704 | 0.39 | -0.63 | 2.32 | -12.77 | 18.72 | -0.48 | 0.70 | 29.54 | 0.29 | -0.01 | 0.50 |
| WSO4_S   | ED_MATCH      | 704 | 0.51 | 0.12  | 1.15 | 3.29   | 20.15 | 0.12  | 0.75 | 30.50 | 0.35 | -0.08 | 0.46 |
| WSO4_S   | ED_MINNI      | 704 | 0.28 | -0.98 | 3.53 | -17.67 | 18.88 | -0.66 | 0.71 | 29.34 | 0.55 | -0.02 | 0.49 |
| WSO4_S   | ENSEMBLE      | 703 | 0.53 | -0.29 | 1.21 | -6.83  | 16.11 | -0.25 | 0.60 | 25.47 | 0.45 | 0.13  | 0.57 |
| SO2_S    | AQ_DE1_HTAP   | 695 | 0.39 | 0.49  | 2.45 | 0.36   | 0.66  | 0.65  | 1.19 | 1.12  | 0.31 | -0.34 | 0.33 |
| SO2_S    | AQ_DK1_HTAP   | 671 | 0.59 | 0.14  | 2.07 | 0.09   | 0.41  | 0.15  | 0.72 | 0.88  | 0.54 | 0.19  | 0.60 |
| SO2_S    | AQ_FI1_MACC   | 695 | 0.50 | 0.48  | 2.43 | 0.36   | 0.57  | 0.64  | 1.03 | 1.11  | 0.52 | -0.16 | 0.42 |
| SO2_S    | AQ_FI1_HTAP   | 695 | 0.57 | 0.36  | 2.52 | 0.24   | 0.48  | 0.43  | 0.86 | 1.06  | 0.48 | 0.03  | 0.52 |
| SO2_S    | AQ_FRES1_HTAP | 695 | 0.53 | -0.05 | 2.69 | -0.03  | 0.42  | -0.05 | 0.75 | 0.89  | 0.42 | 0.16  | 0.58 |
| SO2_S    | AQ_UK1_MACC   | 683 | 0.50 | 0.51  | 1.57 | 0.39   | 0.54  | 0.69  | 0.96 | 0.92  | 0.62 | -0.08 | 0.46 |
| SO2_S    | AQ_UK2_HTAP   | 671 | 0.36 | 0.70  | 2.32 | 0.62   | 0.77  | 1.08  | 1.35 | 1.25  | 0.55 | -0.52 | 0.24 |
| SO2_S    | ED_CHIM       | 671 | 0.56 | 0.28  | 2.70 | 0.18   | 0.48  | 0.32  | 0.84 | 1.08  | 0.48 | 0.05  | 0.53 |

| Variable | Model         | n   | FAC2 | FB    | NMSE | MB     | MGE   | NMB   | NMGE | RMSE  | r    | COE   | IOA  |
|----------|---------------|-----|------|-------|------|--------|-------|-------|------|-------|------|-------|------|
| SO2_S    | ED_CMAQ       | 671 | 0.35 | 0.73  | 2.56 | 0.65   | 0.80  | 1.14  | 1.40 | 1.34  | 0.56 | -0.58 | 0.21 |
| SO2_S    | ED_EMEP       | 671 | 0.51 | -0.21 | 2.63 | -0.11  | 0.38  | -0.19 | 0.66 | 0.83  | 0.51 | 0.25  | 0.63 |
| SO2_S    | ED_LOTO       | 671 | 0.59 | 0.21  | 2.11 | 0.13   | 0.43  | 0.23  | 0.76 | 0.92  | 0.50 | 0.14  | 0.57 |
| SO2_S    | ED_MATCH      | 671 | 0.52 | 0.22  | 1.93 | 0.14   | 0.44  | 0.25  | 0.78 | 0.89  | 0.51 | 0.12  | 0.56 |
| SO2_S    | ED_MINNI      | 671 | 0.41 | 0.44  | 1.56 | 0.32   | 0.55  | 0.57  | 0.96 | 0.89  | 0.55 | -0.08 | 0.46 |
| SO2_S    | ENSEMBLE      | 671 | 0.58 | 0.23  | 1.89 | 0.15   | 0.42  | 0.26  | 0.73 | 0.88  | 0.54 | 0.18  | 0.59 |
| PM_SO4_S | AQ_DE1_HTAP   | 288 | 0.75 | -0.01 | 0.38 | -0.01  | 0.19  | -0.01 | 0.44 | 0.26  | 0.50 | 0.13  | 0.57 |
| PM_SO4_S | AQ_DK1_HTAP   | 265 | 0.74 | 0.44  | 0.70 | 0.24   | 0.28  | 0.56  | 0.67 | 0.44  | 0.57 | -0.39 | 0.30 |
| PM_SO4_S | AQ_FI1_MACC   | 288 | 0.57 | -0.26 | 0.89 | -0.10  | 0.22  | -0.23 | 0.51 | 0.35  | 0.37 | -0.01 | 0.49 |
| PM_SO4_S | AQ_FI1_HTAP   | 288 | 0.55 | -0.30 | 0.83 | -0.11  | 0.21  | -0.26 | 0.50 | 0.33  | 0.40 | 0.01  | 0.50 |
| PM_SO4_S | AQ_FRES1_HTAP | 288 | 0.86 | 0.15  | 0.29 | 0.07   | 0.15  | 0.16  | 0.36 | 0.25  | 0.69 | 0.29  | 0.65 |
| PM_SO4_S | AQ_UK1_MACC   | 277 | 0.79 | 0.06  | 0.28 | 0.02   | 0.15  | 0.06  | 0.37 | 0.22  | 0.65 | 0.27  | 0.64 |
| PM_SO4_S | AQ_UK2_HTAP   | 277 | 0.72 | 0.01  | 0.48 | 0.01   | 0.18  | 0.01  | 0.45 | 0.28  | 0.45 | 0.11  | 0.56 |
| PM_SO4_S | ED_CHIM       | 265 | 0.83 | -0.22 | 0.32 | -0.08  | 0.15  | -0.20 | 0.36 | 0.21  | 0.68 | 0.26  | 0.63 |
| PM_SO4_S | ED_CMAQ       | 265 | 0.74 | 0.33  | 0.28 | 0.17   | 0.20  | 0.40  | 0.48 | 0.27  | 0.71 | 0.00  | 0.50 |
| PM_SO4_S | ED_EMEP       | 265 | 0.85 | -0.02 | 0.27 | -0.01  | 0.14  | -0.02 | 0.33 | 0.22  | 0.74 | 0.31  | 0.66 |
| PM_SO4_S | ED_LOTO       | 265 | 0.71 | -0.32 | 0.53 | -0.12  | 0.19  | -0.28 | 0.45 | 0.26  | 0.54 | 0.08  | 0.54 |
| PM_SO4_S | ED_MATCH      | 265 | 0.75 | -0.31 | 0.43 | -0.11  | 0.16  | -0.27 | 0.39 | 0.24  | 0.64 | 0.20  | 0.60 |
| PM_SO4_S | ED_MINNI      | 265 | 0.83 | -0.14 | 0.25 | -0.06  | 0.14  | -0.13 | 0.32 | 0.20  | 0.74 | 0.34  | 0.67 |
| PM_SO4_S | ENSEMBLE      | 265 | 0.79 | -0.23 | 0.41 | -0.09  | 0.16  | -0.21 | 0.37 | 0.24  | 0.61 | 0.24  | 0.62 |
| PRECIP   | AQ_DE1_HTAP   | 661 | 0.63 | -0.33 | 0.60 | -23.45 | 36.92 | -0.28 | 0.44 | 54.65 | 0.68 | 0.23  | 0.62 |
| PRECIP   | AQ_DK1_HTAP   | 668 | 0.71 | 0.05  | 0.54 | 3.98   | 40.01 | 0.05  | 0.49 | 60.94 | 0.61 | 0.17  | 0.58 |
| PRECIP   | AQ_FI1_MACC   | 706 | 0.81 | 0.11  | 0.37 | 9.43   | 30.81 | 0.12  | 0.39 | 50.88 | 0.71 | 0.36  | 0.68 |
| PRECIP   | AQ_FI1_HTAP   | 706 | 0.81 | 0.11  | 0.37 | 9.43   | 30.81 | 0.12  | 0.39 | 50.88 | 0.71 | 0.36  | 0.68 |
| PRECIP   | AQ_FRES1_HTAP | 708 | 0.83 | 0.11  | 0.26 | 9.48   | 28.27 | 0.12  | 0.36 | 42.91 | 0.79 | 0.41  | 0.70 |
| PRECIP   | AQ_UK1_MACC   | 695 | 0.63 | -0.20 | 0.56 | -14.57 | 37.43 | -0.18 | 0.47 | 54.53 | 0.66 | 0.22  | 0.61 |
| PRECIP   | AQ_UK2_HTAP   | 681 | 0.68 | -0.17 | 0.47 | -12.82 | 35.49 | -0.16 | 0.44 | 51.37 | 0.68 | 0.26  | 0.63 |

| Variable | Model         | n   | FAC2 | FB    | NMSE | MB    | MGE   | NMB   | NMGE | RMSE  | r    | COE   | IOA  |
|----------|---------------|-----|------|-------|------|-------|-------|-------|------|-------|------|-------|------|
| PRECIP   | ED_CHIM       | 708 | 0.66 | -0.11 | 0.52 | -8.39 | 36.46 | -0.11 | 0.46 | 53.92 | 0.62 | 0.24  | 0.62 |
| PRECIP   | ED_CMAQ       | 708 | 0.75 | -0.06 | 0.39 | -4.47 | 32.03 | -0.06 | 0.40 | 48.39 | 0.70 | 0.33  | 0.67 |
| PRECIP   | ED_EMEP       | 708 | 0.66 | -0.11 | 0.52 | -8.39 | 36.46 | -0.11 | 0.46 | 53.92 | 0.62 | 0.24  | 0.62 |
| PRECIP   | ED_LOTO       | 708 | 0.68 | -0.11 | 0.59 | -8.50 | 38.21 | -0.11 | 0.48 | 57.73 | 0.57 | 0.20  | 0.60 |
| PRECIP   | ED_MATCH      | 708 | 0.76 | -0.01 | 0.35 | -0.40 | 30.30 | -0.01 | 0.38 | 47.15 | 0.73 | 0.37  | 0.68 |
| PRECIP   | ED_MINNI      | 708 | 0.66 | -0.11 | 0.52 | -8.39 | 36.46 | -0.11 | 0.46 | 53.92 | 0.62 | 0.24  | 0.62 |
| TNO3_N   | AQ_DE1_HTAP   | 554 | 0.41 | -0.70 | 1.46 | -0.25 | 0.29  | -0.52 | 0.59 | 0.41  | 0.52 | -0.04 | 0.48 |
| TNO3_N   | AQ_DK1_HTAP   | 544 | 0.77 | 0.27  | 0.31 | 0.15  | 0.23  | 0.31  | 0.47 | 0.31  | 0.73 | 0.18  | 0.59 |
| TNO3_N   | AQ_FI1_MACC   | 554 | 0.80 | -0.06 | 0.45 | -0.03 | 0.21  | -0.05 | 0.44 | 0.32  | 0.59 | 0.23  | 0.61 |
| TNO3_N   | AQ_FI1_HTAP   | 554 | 0.74 | 0.22  | 0.49 | 0.12  | 0.26  | 0.25  | 0.53 | 0.38  | 0.57 | 0.07  | 0.54 |
| TNO3_N   | AQ_FRES1_HTAP | 554 | 0.73 | -0.13 | 0.31 | -0.06 | 0.18  | -0.12 | 0.37 | 0.26  | 0.77 | 0.35  | 0.68 |
| TNO3_N   | AQ_UK1_MACC   | 544 | 0.84 | 0.20  | 0.31 | 0.11  | 0.20  | 0.23  | 0.41 | 0.30  | 0.75 | 0.28  | 0.64 |
| TNO3_N   | AQ_UK2_HTAP   | 544 | 0.85 | 0.17  | 0.40 | 0.09  | 0.21  | 0.18  | 0.44 | 0.34  | 0.74 | 0.24  | 0.62 |
| TNO3_N   | ED_CHIM       | 544 | 0.63 | 0.53  | 0.73 | 0.36  | 0.39  | 0.73  | 0.79 | 0.55  | 0.76 | -0.39 | 0.31 |
| TNO3_N   | ED_CMAQ       | 544 | 0.53 | 0.65  | 1.05 | 0.47  | 0.49  | 0.97  | 1.00 | 0.70  | 0.74 | -0.75 | 0.12 |
| TNO3_N   | ED_EMEP       | 544 | 0.72 | 0.23  | 0.43 | 0.13  | 0.26  | 0.26  | 0.52 | 0.36  | 0.60 | 0.08  | 0.54 |
| TNO3_N   | ED_LOTO       | 544 | 0.81 | 0.17  | 0.30 | 0.09  | 0.20  | 0.18  | 0.41 | 0.29  | 0.73 | 0.29  | 0.64 |
| TNO3_N   | ED_MATCH      | 544 | 0.83 | 0.05  | 0.26 | 0.03  | 0.17  | 0.06  | 0.35 | 0.25  | 0.75 | 0.38  | 0.69 |
| TNO3_N   | ED_MINNI      | 544 | 0.79 | 0.20  | 0.37 | 0.11  | 0.22  | 0.22  | 0.44 | 0.33  | 0.74 | 0.22  | 0.61 |
| TNO3_N   | ENSEMBLE      | 544 | 0.81 | 0.22  | 0.27 | 0.12  | 0.20  | 0.25  | 0.41 | 0.28  | 0.76 | 0.28  | 0.64 |
| TNH4_N   | AQ_DE1_HTAP   | 472 | 0.59 | 0.10  | 1.01 | 0.15  | 0.96  | 0.11  | 0.66 | 1.53  | 0.29 | -0.11 | 0.44 |
| TNH4_N   | AQ_DK1_HTAP   | 461 | 0.74 | 0.23  | 0.46 | 0.38  | 0.74  | 0.26  | 0.51 | 1.10  | 0.69 | 0.15  | 0.57 |
| TNH4_N   | AQ_FI1_MACC   | 472 | 0.72 | 0.19  | 0.79 | 0.30  | 0.84  | 0.21  | 0.58 | 1.41  | 0.54 | 0.03  | 0.51 |
| TNH4_N   | AQ_FI1_HTAP   | 472 | 0.72 | 0.22  | 0.77 | 0.36  | 0.83  | 0.25  | 0.57 | 1.41  | 0.55 | 0.04  | 0.52 |
| TNH4_N   | AQ_FRES1_HTAP | 472 | 0.74 | 0.32  | 0.64 | 0.55  | 0.87  | 0.38  | 0.60 | 1.36  | 0.65 | 0.00  | 0.50 |
| TNH4_N   | AQ_UK1_MACC   | 461 | 0.72 | 0.17  | 0.69 | 0.26  | 0.78  | 0.18  | 0.54 | 1.30  | 0.57 | 0.11  | 0.55 |
| TNH4_N   | AQ_UK2_HTAP   | 461 | 0.54 | 0.66  | 1.40 | 1.42  | 1.58  | 0.98  | 1.09 | 2.41  | 0.76 | -0.81 | 0.10 |

| Variable | Model         | n   | FAC2 | FB    | NMSE | MB    | MGE  | NMB   | NMGE | RMSE | r    | COE   | IOA  |
|----------|---------------|-----|------|-------|------|-------|------|-------|------|------|------|-------|------|
| TNH4_N   | ED_CHIM       | 461 | 0.73 | 0.24  | 0.42 | 0.39  | 0.73 | 0.27  | 0.51 | 1.06 | 0.71 | 0.16  | 0.58 |
| TNH4_N   | ED_CMAQ       | 461 | 0.64 | 0.36  | 0.74 | 0.63  | 0.99 | 0.43  | 0.68 | 1.49 | 0.58 | -0.13 | 0.43 |
| TNH4_N   | ED_EMEP       | 461 | 0.79 | 0.01  | 0.35 | 0.02  | 0.57 | 0.01  | 0.39 | 0.86 | 0.73 | 0.35  | 0.68 |
| TNH4_N   | ED_LOTO       | 461 | 0.74 | 0.34  | 0.63 | 0.60  | 0.86 | 0.41  | 0.60 | 1.36 | 0.68 | 0.01  | 0.51 |
| TNH4_N   | ED_MATCH      | 461 | 0.79 | -0.10 | 0.39 | -0.14 | 0.56 | -0.10 | 0.39 | 0.86 | 0.73 | 0.36  | 0.68 |
| TNH4_N   | ED_MINNI      | 461 | 0.73 | 0.24  | 0.42 | 0.39  | 0.74 | 0.27  | 0.51 | 1.06 | 0.69 | 0.15  | 0.57 |
| TNH4_N   | ENSEMBLE      | 461 | 0.79 | 0.17  | 0.40 | 0.28  | 0.67 | 0.19  | 0.46 | 1.00 | 0.70 | 0.23  | 0.62 |
| TSO4_S   | AQ_DE1_HTAP   | 245 | 0.57 | 0.37  | 0.80 | 0.34  | 0.57 | 0.45  | 0.76 | 0.81 | 0.52 | -0.39 | 0.31 |
| TSO4_S   | AQ_DK1_HTAP   | 222 | 0.80 | 0.35  | 0.48 | 0.32  | 0.38 | 0.42  | 0.49 | 0.64 | 0.81 | 0.08  | 0.54 |
| TSO4_S   | AQ_FI1_MACC   | 245 | 0.74 | 0.18  | 0.57 | 0.15  | 0.39 | 0.20  | 0.51 | 0.62 | 0.71 | 0.06  | 0.53 |
| TSO4_S   | AQ_FI1_HTAP   | 245 | 0.79 | 0.06  | 0.37 | 0.04  | 0.28 | 0.06  | 0.37 | 0.47 | 0.75 | 0.33  | 0.66 |
| TSO4_S   | AQ_FRES1_HTAP | 245 | 0.81 | 0.07  | 0.44 | 0.05  | 0.32 | 0.07  | 0.43 | 0.52 | 0.59 | 0.22  | 0.61 |
| TSO4_S   | AQ_UK1_MACC   | 234 | 0.84 | 0.26  | 0.44 | 0.22  | 0.35 | 0.30  | 0.48 | 0.56 | 0.68 | 0.15  | 0.57 |
| TSO4_S   | AQ_UK2_HTAP   | 234 | 0.72 | 0.37  | 0.76 | 0.33  | 0.50 | 0.45  | 0.67 | 0.77 | 0.63 | -0.20 | 0.40 |
| TSO4_S   | ED_CHIM       | 222 | 0.84 | 0.00  | 0.52 | 0.00  | 0.29 | 0.00  | 0.38 | 0.55 | 0.76 | 0.28  | 0.64 |
| TSO4_S   | ED_CMAQ       | 222 | 0.65 | 0.52  | 0.90 | 0.54  | 0.62 | 0.70  | 0.80 | 0.95 | 0.77 | -0.50 | 0.25 |
| TSO4_S   | ED_EMEP       | 222 | 0.81 | -0.13 | 0.42 | -0.09 | 0.29 | -0.12 | 0.38 | 0.46 | 0.73 | 0.29  | 0.64 |
| TSO4_S   | ED_LOTO       | 222 | 0.83 | -0.08 | 0.40 | -0.06 | 0.29 | -0.07 | 0.37 | 0.47 | 0.75 | 0.30  | 0.65 |
| TSO4_S   | ED_MATCH      | 222 | 0.81 | -0.08 | 0.38 | -0.06 | 0.30 | -0.08 | 0.40 | 0.45 | 0.72 | 0.26  | 0.63 |
| TSO4_S   | ED_MINNI      | 222 | 0.80 | 0.20  | 0.46 | 0.17  | 0.36 | 0.22  | 0.47 | 0.57 | 0.74 | 0.12  | 0.56 |
| TSO4_S   | ENSEMBLE      | 222 | 0.88 | -0.02 | 0.28 | -0.02 | 0.24 | -0.02 | 0.32 | 0.40 | 0.81 | 0.41  | 0.71 |

### S3.7 . Tables with complete statistics from annual values (definition in S3.10). All available sites

| Variable | Model         | n  | FAC2 | FB    | NMSE | MB      | MGE    | NMB   | NMGE | RMSE   | r    | COE   | IOA  |
|----------|---------------|----|------|-------|------|---------|--------|-------|------|--------|------|-------|------|
| WNO3_N   | AQ_DE1_HTAP   | 59 | 0.00 | -1.50 | 7.77 | -227.79 | 227.79 | -0.86 | 0.86 | 279.67 | 0.70 | -0.80 | 0.10 |
| WNO3_N   | AQ_DK1_HTAP   | 58 | 0.88 | -0.09 | 0.29 | -22.81  | 94.48  | -0.08 | 0.35 | 138.04 | 0.64 | 0.25  | 0.63 |
| WNO3_N   | AQ_FI1_MACC   | 59 | 0.68 | -0.45 | 0.58 | -98.20  | 110.99 | -0.37 | 0.42 | 160.47 | 0.72 | 0.12  | 0.56 |
| WNO3_N   | AQ_FI1_HTAP   | 59 | 0.92 | -0.12 | 0.25 | -30.28  | 77.75  | -0.11 | 0.29 | 124.09 | 0.74 | 0.39  | 0.69 |
| WNO3_N   | AQ_FRES1_HTAP | 59 | 0.86 | -0.44 | 0.60 | -95.39  | 104.40 | -0.36 | 0.39 | 164.29 | 0.73 | 0.17  | 0.59 |
| WNO3_N   | AQ_UK1_MACC   | 59 | 0.61 | -0.53 | 0.74 | -111.10 | 121.67 | -0.42 | 0.46 | 174.25 | 0.66 | 0.04  | 0.52 |
| WNO3_N   | AQ_UK2_HTAP   | 58 | 0.81 | -0.30 | 0.38 | -70.33  | 88.30  | -0.26 | 0.33 | 141.62 | 0.73 | 0.30  | 0.65 |
| WNO3_N   | ED_CHIM       | 58 | 0.84 | -0.34 | 0.50 | -78.79  | 97.40  | -0.29 | 0.36 | 159.14 | 0.66 | 0.23  | 0.61 |
| WNO3_N   | ED_CMAQ       | 58 | 0.91 | -0.23 | 0.38 | -56.18  | 91.54  | -0.21 | 0.34 | 147.47 | 0.65 | 0.27  | 0.64 |
| WNO3_N   | ED_EMEP       | 58 | 0.93 | -0.03 | 0.23 | -9.12   | 83.17  | -0.03 | 0.31 | 126.36 | 0.70 | 0.34  | 0.67 |
| WNO3_N   | ED_LOTO       | 58 | 0.69 | -0.47 | 0.57 | -101.85 | 113.84 | -0.38 | 0.42 | 159.40 | 0.74 | 0.10  | 0.55 |
| WNO3_N   | ED_MATCH      | 58 | 0.91 | 0.07  | 0.18 | 19.16   | 86.91  | 0.07  | 0.32 | 118.49 | 0.76 | 0.31  | 0.66 |
| WNO3_N   | ED_MINNI      | 58 | 0.05 | -1.16 | 3.33 | -197.09 | 198.24 | -0.73 | 0.74 | 252.68 | 0.63 | -0.57 | 0.21 |
| WNO3_N   | ENSEMBLE      | 58 | 0.95 | -0.19 | 0.26 | -46.05  | 74.44  | -0.17 | 0.28 | 125.09 | 0.77 | 0.41  | 0.71 |
| HNO3_N   | AQ_DE1_HTAP   | 13 | 0.15 | -1.11 | 5.04 | -0.10   | 0.11   | -0.71 | 0.79 | 0.17   | 0.17 | 0.02  | 0.51 |
| HNO3_N   | AQ_DK1_HTAP   | 12 | 0.58 | -0.35 | 1.18 | -0.04   | 0.09   | -0.30 | 0.60 | 0.13   | 0.47 | 0.26  | 0.63 |
| HNO3_N   | AQ_FI1_MACC   | 13 | 0.46 | -0.82 | 2.81 | -0.08   | 0.10   | -0.58 | 0.72 | 0.15   | 0.41 | 0.10  | 0.55 |
| HNO3_N   | AQ_FI1_HTAP   | 13 | 0.62 | -0.42 | 1.43 | -0.05   | 0.09   | -0.35 | 0.63 | 0.13   | 0.40 | 0.22  | 0.61 |
| HNO3_N   | AQ_FRES1_HTAP | 13 | 0.54 | -0.48 | 1.69 | -0.05   | 0.09   | -0.39 | 0.64 | 0.14   | 0.28 | 0.21  | 0.60 |
| HNO3_N   | AQ_UK1_MACC   | 12 | 0.67 | -0.21 | 1.20 | -0.03   | 0.09   | -0.19 | 0.66 | 0.14   | 0.27 | 0.19  | 0.60 |
| HNO3_N   | AQ_UK2_HTAP   | 12 | 0.42 | -0.67 | 2.33 | -0.07   | 0.10   | -0.50 | 0.73 | 0.15   | 0.19 | 0.11  | 0.55 |
| HNO3_N   | ED_CHIM       | 12 | 0.50 | -0.11 | 1.26 | -0.01   | 0.11   | -0.10 | 0.74 | 0.15   | 0.15 | 0.09  | 0.55 |
| HNO3_N   | ED_CMAQ       | 12 | 0.58 | 0.08  | 1.29 | 0.01    | 0.11   | 0.09  | 0.77 | 0.17   | 0.11 | 0.05  | 0.52 |
| HNO3_N   | ED_EMEP       | 12 | 0.33 | -0.67 | 2.18 | -0.07   | 0.11   | -0.50 | 0.77 | 0.15   | 0.35 | 0.06  | 0.53 |
| HNO3_N   | ED_LOTO       | 12 | 0.50 | -0.44 | 1.54 | -0.05   | 0.10   | -0.36 | 0.71 | 0.14   | 0.30 | 0.12  | 0.56 |

| Variable | Model         | n  | FAC2 | FB    | NMSE | MB      | MGE    | NMB   | NMGE | RMSE   | r    | COE   | IOA   |
|----------|---------------|----|------|-------|------|---------|--------|-------|------|--------|------|-------|-------|
| HNO3_N   | ED_MATCH      | 12 | 0.58 | -0.17 | 1.22 | -0.02   | 0.11   | -0.15 | 0.79 | 0.15   | 0.12 | 0.04  | 0.52  |
| HNO3_N   | ED_MINNI      | 12 | 0.42 | -0.46 | 1.83 | -0.05   | 0.11   | -0.37 | 0.75 | 0.15   | 0.07 | 0.08  | 0.54  |
| HNO3_N   | ENSEMBLE      | 12 | 0.58 | -0.41 | 1.47 | -0.05   | 0.10   | -0.34 | 0.66 | 0.14   | 0.30 | 0.18  | 0.59  |
| PM_NO3_N | AQ_DE1_HTAP   | 33 | 0.45 | -0.57 | 0.97 | -0.15   | 0.18   | -0.44 | 0.55 | 0.25   | 0.52 | -0.10 | 0.45  |
| PM_NO3_N | AQ_DK1_HTAP   | 32 | 0.69 | 0.40  | 0.32 | 0.16    | 0.18   | 0.50  | 0.56 | 0.23   | 0.77 | -0.08 | 0.46  |
| PM_NO3_N | AQ_FI1_MACC   | 33 | 0.79 | 0.08  | 0.30 | 0.03    | 0.14   | 0.08  | 0.44 | 0.19   | 0.59 | 0.14  | 0.57  |
| PM_NO3_N | AQ_FI1_HTAP   | 33 | 0.70 | 0.35  | 0.34 | 0.14    | 0.19   | 0.43  | 0.56 | 0.23   | 0.66 | -0.11 | 0.45  |
| PM_NO3_N | AQ_FRES1_HTAP | 33 | 0.58 | -0.11 | 0.29 | -0.03   | 0.14   | -0.10 | 0.42 | 0.17   | 0.74 | 0.16  | 0.58  |
| PM_NO3_N | AQ_UK1_MACC   | 32 | 0.75 | 0.30  | 0.32 | 0.11    | 0.16   | 0.35  | 0.49 | 0.22   | 0.69 | 0.05  | 0.53  |
| PM_NO3_N | AQ_UK2_HTAP   | 31 | 0.74 | 0.35  | 0.41 | 0.14    | 0.19   | 0.42  | 0.55 | 0.26   | 0.69 | -0.11 | 0.44  |
| PM_NO3_N | ED_CHIM       | 32 | 0.59 | 0.61  | 0.79 | 0.29    | 0.32   | 0.88  | 0.96 | 0.40   | 0.73 | -0.86 | 0.07  |
| PM_NO3_N | ED_CMAQ       | 32 | 0.50 | 0.75  | 1.04 | 0.39    | 0.40   | 1.19  | 1.22 | 0.50   | 0.71 | -1.36 | -0.15 |
| PM_NO3_N | ED_EMEP       | 32 | 0.72 | 0.37  | 0.31 | 0.15    | 0.17   | 0.46  | 0.52 | 0.22   | 0.76 | -0.01 | 0.49  |
| PM_NO3_N | ED_LOTO       | 32 | 0.78 | 0.34  | 0.35 | 0.13    | 0.17   | 0.41  | 0.51 | 0.23   | 0.75 | 0.02  | 0.51  |
| PM_NO3_N | ED_MATCH      | 32 | 0.81 | 0.04  | 0.16 | 0.01    | 0.10   | 0.04  | 0.32 | 0.14   | 0.81 | 0.39  | 0.69  |
| PM_NO3_N | ED_MINNI      | 32 | 0.66 | 0.30  | 0.39 | 0.11    | 0.18   | 0.35  | 0.56 | 0.24   | 0.68 | -0.08 | 0.46  |
| PM_NO3_N | ENSEMBLE      | 32 | 0.75 | 0.34  | 0.24 | 0.13    | 0.15   | 0.41  | 0.46 | 0.19   | 0.82 | 0.10  | 0.55  |
| WNH4_N   | AQ_DE1_HTAP   | 61 | 0.34 | -0.77 | 1.18 | -175.31 | 178.63 | -0.56 | 0.57 | 227.76 | 0.77 | -0.29 | 0.36  |
| WNH4_N   | AQ_DK1_HTAP   | 60 | 0.85 | -0.03 | 0.29 | -8.19   | 120.15 | -0.03 | 0.38 | 168.00 | 0.62 | 0.15  | 0.57  |
| WNH4_N   | AQ_FI1_MACC   | 61 | 0.87 | -0.15 | 0.23 | -43.58  | 100.68 | -0.14 | 0.32 | 140.83 | 0.75 | 0.27  | 0.64  |
| WNH4_N   | AQ_FI1_HTAP   | 61 | 0.89 | -0.11 | 0.23 | -33.29  | 101.76 | -0.11 | 0.32 | 142.16 | 0.74 | 0.27  | 0.63  |
| WNH4_N   | AQ_FRES1_HTAP | 61 | 0.34 | -0.80 | 1.34 | -179.62 | 183.18 | -0.57 | 0.58 | 239.02 | 0.60 | -0.32 | 0.34  |
| WNH4_N   | AQ_UK1_MACC   | 61 | 0.54 | -0.61 | 0.83 | -146.99 | 161.42 | -0.47 | 0.51 | 209.19 | 0.65 | -0.16 | 0.42  |
| WNH4_N   | AQ_UK2_HTAP   | 61 | 0.79 | -0.26 | 0.33 | -71.80  | 114.49 | -0.23 | 0.36 | 159.83 | 0.70 | 0.17  | 0.59  |
| WNH4_N   | ED_CHIM       | 60 | 0.57 | -0.47 | 0.71 | -119.51 | 149.64 | -0.38 | 0.47 | 209.71 | 0.53 | -0.06 | 0.47  |
| WNH4_N   | ED_CMAQ       | 60 | 0.65 | -0.55 | 0.72 | -135.88 | 142.47 | -0.43 | 0.45 | 201.13 | 0.70 | -0.01 | 0.49  |
| WNH4_N   | ED_EMEP       | 60 | 0.90 | -0.01 | 0.16 | -2.02   | 90.99  | -0.01 | 0.29 | 126.65 | 0.81 | 0.35  | 0.68  |



| Variable | Model         | n  | FAC2 | FB    | NMSE | MB      | MGE    | NMB   | NMGE | RMSE   | r    | COE   | IOA   |
|----------|---------------|----|------|-------|------|---------|--------|-------|------|--------|------|-------|-------|
| WNH4_N   | ED_LOTO       | 60 | 0.82 | -0.35 | 0.38 | -93.79  | 125.30 | -0.30 | 0.40 | 163.54 | 0.74 | 0.11  | 0.56  |
| WNH4_N   | ED_MATCH      | 60 | 0.82 | 0.17  | 0.31 | 59.53   | 123.99 | 0.19  | 0.39 | 190.34 | 0.72 | 0.12  | 0.56  |
| WNH4_N   | ED_MINNI      | 60 | 0.30 | -0.81 | 1.30 | -181.83 | 184.02 | -0.58 | 0.58 | 234.07 | 0.78 | -0.31 | 0.35  |
| WNH4_N   | ENSEMBLE      | 60 | 0.93 | -0.11 | 0.21 | -33.40  | 92.82  | -0.11 | 0.29 | 134.95 | 0.76 | 0.34  | 0.67  |
| NH3_N    | AQ_DE1_HTAP   | 13 | 0.54 | 0.40  | 0.59 | 0.42    | 0.62   | 0.50  | 0.74 | 0.78   | 0.03 | -0.83 | 0.08  |
| NH3_N    | AQ_DK1_HTAP   | 12 | 0.67 | 0.43  | 0.79 | 0.46    | 0.65   | 0.55  | 0.79 | 0.91   | 0.67 | -0.83 | 0.08  |
| NH3_N    | AQ_FI1_MACC   | 13 | 0.46 | 0.66  | 2.59 | 0.81    | 1.09   | 0.98  | 1.31 | 1.89   | 0.59 | -2.25 | -0.38 |
| NH3_N    | AQ_FI1_HTAP   | 13 | 0.62 | 0.68  | 2.37 | 0.87    | 1.02   | 1.04  | 1.23 | 1.83   | 0.62 | -2.04 | -0.34 |
| NH3_N    | AQ_FRES1_HTAP | 13 | 0.46 | 0.62  | 1.59 | 0.75    | 0.96   | 0.89  | 1.15 | 1.45   | 0.64 | -1.84 | -0.30 |
| NH3_N    | AQ_UK1_MACC   | 12 | 0.67 | 0.37  | 1.21 | 0.37    | 0.63   | 0.45  | 0.76 | 1.09   | 0.63 | -0.77 | 0.11  |
| NH3_N    | AQ_UK2_HTAP   | 12 | 0.42 | 0.85  | 2.31 | 1.21    | 1.39   | 1.47  | 1.68 | 1.97   | 0.70 | -2.90 | -0.49 |
| NH3_N    | ED_CHIM       | 12 | 0.58 | 0.11  | 0.37 | 0.10    | 0.46   | 0.12  | 0.56 | 0.53   | 0.71 | -0.30 | 0.35  |
| NH3_N    | ED_CMAQ       | 12 | 0.58 | 0.28  | 1.17 | 0.27    | 0.60   | 0.32  | 0.73 | 1.03   | 0.34 | -0.69 | 0.16  |
| NH3_N    | ED_EMEP       | 12 | 0.67 | -0.04 | 0.27 | -0.03   | 0.34   | -0.04 | 0.42 | 0.42   | 0.70 | 0.03  | 0.52  |
| NH3_N    | ED_LOTO       | 12 | 0.58 | 0.63  | 1.61 | 0.76    | 0.92   | 0.92  | 1.12 | 1.45   | 0.77 | -1.60 | -0.23 |
| NH3_N    | ED_MATCH      | 12 | 0.58 | 0.06  | 0.44 | 0.05    | 0.43   | 0.06  | 0.52 | 0.56   | 0.57 | -0.21 | 0.39  |
| NH3_N    | ED_MINNI      | 12 | 0.50 | 0.25  | 0.45 | 0.24    | 0.54   | 0.29  | 0.65 | 0.63   | 0.64 | -0.51 | 0.25  |
| NH3_N    | ENSEMBLE      | 12 | 0.67 | 0.44  | 0.97 | 0.46    | 0.69   | 0.56  | 0.84 | 1.01   | 0.69 | -0.95 | 0.02  |
| PM_NH4_N | AQ_DE1_HTAP   | 28 | 0.79 | -0.07 | 0.31 | -0.04   | 0.23   | -0.07 | 0.40 | 0.31   | 0.70 | 0.39  | 0.69  |
| PM_NH4_N | AQ_DK1_HTAP   | 27 | 0.74 | 0.17  | 0.25 | 0.11    | 0.23   | 0.19  | 0.39 | 0.32   | 0.74 | 0.40  | 0.70  |
| PM_NH4_N | AQ_FI1_MACC   | 28 | 0.68 | -0.12 | 0.38 | -0.07   | 0.24   | -0.11 | 0.42 | 0.34   | 0.64 | 0.36  | 0.68  |
| PM_NH4_N | AQ_FI1_HTAP   | 28 | 0.82 | 0.00  | 0.29 | 0.00    | 0.23   | 0.00  | 0.40 | 0.32   | 0.69 | 0.39  | 0.69  |
| PM_NH4_N | AQ_FRES1_HTAP | 28 | 0.75 | 0.32  | 0.28 | 0.22    | 0.26   | 0.37  | 0.45 | 0.37   | 0.78 | 0.31  | 0.66  |
| PM_NH4_N | AQ_UK1_MACC   | 27 | 0.78 | 0.25  | 0.29 | 0.17    | 0.25   | 0.29  | 0.42 | 0.36   | 0.76 | 0.36  | 0.68  |
| PM_NH4_N | AQ_UK2_HTAP   | 26 | 0.77 | 0.31  | 0.46 | 0.22    | 0.34   | 0.37  | 0.56 | 0.48   | 0.71 | 0.15  | 0.58  |
| PM_NH4_N | ED_CHIM       | 27 | 0.74 | 0.48  | 0.45 | 0.38    | 0.38   | 0.63  | 0.64 | 0.51   | 0.81 | 0.03  | 0.51  |
| PM_NH4_N | ED_CMAQ       | 27 | 0.56 | 0.65  | 0.77 | 0.57    | 0.57   | 0.96  | 0.96 | 0.73   | 0.78 | -0.46 | 0.27  |

| Variable | Model         | n  | FAC2 | FB    | NMSE | MB      | MGE    | NMB   | NMGE | RMSE   | r    | COE   | IOA  |
|----------|---------------|----|------|-------|------|---------|--------|-------|------|--------|------|-------|------|
| PM_NH4_N | ED_EMEP       | 27 | 0.78 | 0.17  | 0.26 | 0.11    | 0.23   | 0.18  | 0.39 | 0.33   | 0.75 | 0.41  | 0.71 |
| PM_NH4_N | ED_LOTO       | 27 | 0.78 | 0.17  | 0.24 | 0.11    | 0.21   | 0.18  | 0.36 | 0.32   | 0.78 | 0.45  | 0.73 |
| PM_NH4_N | ED_MATCH      | 27 | 0.81 | -0.07 | 0.24 | -0.04   | 0.21   | -0.07 | 0.36 | 0.28   | 0.78 | 0.45  | 0.73 |
| PM_NH4_N | ED_MINNI      | 27 | 0.74 | 0.39  | 0.35 | 0.28    | 0.31   | 0.48  | 0.53 | 0.43   | 0.77 | 0.20  | 0.60 |
| PM_NH4_N | ENSEMBLE      | 27 | 0.78 | 0.14  | 0.21 | 0.09    | 0.20   | 0.15  | 0.34 | 0.29   | 0.78 | 0.49  | 0.75 |
| WSO4_S   | AQ_DE1_HTAP   | 61 | 0.72 | -0.50 | 1.02 | -101.28 | 116.67 | -0.40 | 0.46 | 198.53 | 0.55 | 0.09  | 0.54 |
| WSO4_S   | AQ_DK1_HTAP   | 59 | 0.34 | -0.82 | 1.87 | -149.52 | 152.26 | -0.58 | 0.59 | 227.10 | 0.65 | -0.17 | 0.42 |
| WSO4_S   | AQ_FI1_MACC   | 61 | 0.80 | -0.30 | 0.47 | -67.02  | 78.54  | -0.26 | 0.31 | 150.17 | 0.75 | 0.39  | 0.69 |
| WSO4_S   | AQ_FI1_HTAP   | 61 | 0.82 | -0.34 | 0.52 | -73.15  | 79.73  | -0.29 | 0.31 | 153.87 | 0.76 | 0.38  | 0.69 |
| WSO4_S   | AQ_FRES1_HTAP | 61 | 0.33 | -0.87 | 1.99 | -153.64 | 153.64 | -0.60 | 0.60 | 225.45 | 0.76 | -0.20 | 0.40 |
| WSO4_S   | AQ_UK1_MACC   | 61 | 0.80 | -0.27 | 0.70 | -59.95  | 99.36  | -0.24 | 0.39 | 186.09 | 0.49 | 0.22  | 0.61 |
| WSO4_S   | AQ_UK2_HTAP   | 60 | 0.85 | 0.14  | 0.35 | 38.89   | 110.23 | 0.15  | 0.43 | 162.01 | 0.64 | 0.15  | 0.57 |
| WSO4_S   | ED_CHIM       | 59 | 0.20 | -1.07 | 3.35 | -178.72 | 178.72 | -0.70 | 0.70 | 259.29 | 0.60 | -0.37 | 0.31 |
| WSO4_S   | ED_CMAQ       | 59 | 0.85 | -0.14 | 0.59 | -34.54  | 95.94  | -0.13 | 0.37 | 183.13 | 0.49 | 0.26  | 0.63 |
| WSO4_S   | ED_EMEP       | 59 | 0.90 | 0.10  | 0.36 | 27.86   | 103.39 | 0.11  | 0.40 | 162.36 | 0.64 | 0.21  | 0.60 |
| WSO4_S   | ED_LOTO       | 59 | 0.75 | -0.42 | 0.72 | -89.42  | 101.21 | -0.35 | 0.39 | 175.85 | 0.68 | 0.22  | 0.61 |
| WSO4_S   | ED_MATCH      | 59 | 0.80 | 0.33  | 0.40 | 101.40  | 132.97 | 0.39  | 0.52 | 191.78 | 0.77 | -0.02 | 0.49 |
| WSO4_S   | ED_MINNI      | 59 | 0.32 | -0.83 | 1.89 | -150.73 | 151.05 | -0.59 | 0.59 | 227.12 | 0.67 | -0.16 | 0.42 |
| WSO4_S   | ENSEMBLE      | 59 | 0.93 | -0.08 | 0.29 | -19.75  | 69.14  | -0.08 | 0.27 | 132.35 | 0.77 | 0.47  | 0.73 |
| SO2_S    | AQ_DE1_HTAP   | 58 | 0.48 | 0.50  | 1.83 | 0.38    | 0.60   | 0.67  | 1.07 | 0.98   | 0.31 | -0.38 | 0.31 |
| SO2_S    | AQ_DK1_HTAP   | 56 | 0.79 | 0.14  | 1.26 | 0.09    | 0.33   | 0.15  | 0.57 | 0.69   | 0.53 | 0.26  | 0.63 |
| SO2_S    | AQ_FI1_MACC   | 58 | 0.53 | 0.49  | 1.31 | 0.36    | 0.54   | 0.64  | 0.97 | 0.82   | 0.49 | -0.25 | 0.37 |
| SO2_S    | AQ_FI1_HTAP   | 58 | 0.60 | 0.36  | 1.40 | 0.25    | 0.44   | 0.44  | 0.79 | 0.79   | 0.45 | -0.02 | 0.49 |
| SO2_S    | AQ_FRES1_HTAP | 58 | 0.62 | -0.04 | 1.86 | -0.02   | 0.34   | -0.04 | 0.61 | 0.74   | 0.43 | 0.21  | 0.61 |
| SO2_S    | AQ_UK1_MACC   | 57 | 0.63 | 0.52  | 1.05 | 0.39    | 0.51   | 0.70  | 0.90 | 0.75   | 0.67 | -0.16 | 0.42 |
| SO2_S    | AQ_UK2_HTAP   | 56 | 0.38 | 0.70  | 1.62 | 0.62    | 0.75   | 1.08  | 1.32 | 1.05   | 0.57 | -0.71 | 0.15 |
| SO2_S    | ED_CHIM       | 56 | 0.59 | 0.28  | 1.49 | 0.18    | 0.43   | 0.32  | 0.76 | 0.80   | 0.47 | 0.01  | 0.51 |

| Variable | Model         | n  | FAC2 | FB    | NMSE | MB      | MGE    | NMB   | NMGE | RMSE   | r    | COE   | IOA  |
|----------|---------------|----|------|-------|------|---------|--------|-------|------|--------|------|-------|------|
| SO2_S    | ED_CMAQ       | 56 | 0.34 | 0.73  | 1.62 | 0.65    | 0.78   | 1.14  | 1.36 | 1.06   | 0.56 | -0.76 | 0.12 |
| SO2_S    | ED_EMEP       | 56 | 0.55 | -0.21 | 1.78 | -0.11   | 0.32   | -0.19 | 0.55 | 0.69   | 0.54 | 0.28  | 0.64 |
| SO2_S    | ED_LOTO       | 56 | 0.66 | 0.20  | 1.33 | 0.13    | 0.38   | 0.23  | 0.66 | 0.73   | 0.50 | 0.14  | 0.57 |
| SO2_S    | ED_MATCH      | 56 | 0.57 | 0.22  | 1.28 | 0.14    | 0.40   | 0.25  | 0.70 | 0.72   | 0.52 | 0.09  | 0.54 |
| SO2_S    | ED_MINNI      | 56 | 0.41 | 0.44  | 1.14 | 0.32    | 0.51   | 0.57  | 0.89 | 0.76   | 0.55 | -0.15 | 0.42 |
| SO2_S    | ENSEMBLE      | 56 | 0.64 | 0.23  | 1.23 | 0.15    | 0.38   | 0.26  | 0.67 | 0.71   | 0.53 | 0.13  | 0.56 |
| PM_SO4_S | AQ_DE1_HTAP   | 23 | 0.87 | 0.00  | 0.22 | 0.00    | 0.12   | 0.00  | 0.29 | 0.20   | 0.55 | 0.34  | 0.67 |
| PM_SO4_S | AQ_DK1_HTAP   | 21 | 0.81 | 0.46  | 0.65 | 0.26    | 0.26   | 0.60  | 0.62 | 0.44   | 0.55 | -0.53 | 0.24 |
| PM_SO4_S | AQ_FI1_MACC   | 23 | 0.61 | -0.25 | 0.57 | -0.09   | 0.19   | -0.22 | 0.45 | 0.28   | 0.40 | -0.03 | 0.49 |
| PM_SO4_S | AQ_FI1_HTAP   | 23 | 0.65 | -0.29 | 0.51 | -0.11   | 0.20   | -0.25 | 0.47 | 0.26   | 0.46 | -0.06 | 0.47 |
| PM_SO4_S | AQ_FRES1_HTAP | 23 | 0.91 | 0.18  | 0.24 | 0.08    | 0.12   | 0.20  | 0.29 | 0.23   | 0.64 | 0.35  | 0.67 |
| PM_SO4_S | AQ_UK1_MACC   | 22 | 0.77 | 0.06  | 0.19 | 0.03    | 0.11   | 0.06  | 0.26 | 0.18   | 0.63 | 0.41  | 0.70 |
| PM_SO4_S | AQ_UK2_HTAP   | 22 | 0.82 | 0.03  | 0.26 | 0.01    | 0.13   | 0.03  | 0.31 | 0.21   | 0.57 | 0.27  | 0.64 |
| PM_SO4_S | ED_CHIM       | 21 | 0.86 | -0.20 | 0.24 | -0.08   | 0.15   | -0.18 | 0.34 | 0.19   | 0.59 | 0.16  | 0.58 |
| PM_SO4_S | ED_CMAQ       | 21 | 0.71 | 0.34  | 0.24 | 0.18    | 0.19   | 0.41  | 0.44 | 0.25   | 0.63 | -0.08 | 0.46 |
| PM_SO4_S | ED_EMEP       | 21 | 0.95 | 0.00  | 0.19 | 0.00    | 0.10   | 0.00  | 0.24 | 0.19   | 0.69 | 0.42  | 0.71 |
| PM_SO4_S | ED_LOTO       | 21 | 0.71 | -0.32 | 0.32 | -0.12   | 0.17   | -0.27 | 0.40 | 0.21   | 0.61 | 0.02  | 0.51 |
| PM_SO4_S | ED_MATCH      | 21 | 0.71 | -0.28 | 0.32 | -0.11   | 0.17   | -0.25 | 0.39 | 0.21   | 0.57 | 0.04  | 0.52 |
| PM_SO4_S | ED_MINNI      | 21 | 0.86 | -0.13 | 0.18 | -0.05   | 0.11   | -0.12 | 0.27 | 0.17   | 0.71 | 0.34  | 0.67 |
| PM_SO4_S | ENSEMBLE      | 21 | 0.86 | -0.21 | 0.29 | -0.08   | 0.15   | -0.19 | 0.36 | 0.21   | 0.59 | 0.12  | 0.56 |
| PRECIP   | AQ_DE1_HTAP   | 58 | 0.90 | -0.34 | 0.28 | -281.73 | 315.20 | -0.29 | 0.33 | 426.21 | 0.66 | 0.06  | 0.53 |
| PRECIP   | AQ_DK1_HTAP   | 56 | 0.95 | 0.05  | 0.15 | 47.22   | 282.85 | 0.05  | 0.29 | 389.18 | 0.65 | 0.15  | 0.58 |
| PRECIP   | AQ_FI1_MACC   | 59 | 0.90 | 0.11  | 0.14 | 112.66  | 240.34 | 0.12  | 0.25 | 375.83 | 0.65 | 0.29  | 0.64 |
| PRECIP   | AQ_FI1_HTAP   | 59 | 0.90 | 0.11  | 0.14 | 112.66  | 240.34 | 0.12  | 0.25 | 375.83 | 0.65 | 0.29  | 0.64 |
| PRECIP   | AQ_FRES1_HTAP | 59 | 0.93 | 0.11  | 0.09 | 113.76  | 209.91 | 0.12  | 0.22 | 294.53 | 0.78 | 0.38  | 0.69 |
| PRECIP   | AQ_UK1_MACC   | 58 | 0.91 | -0.20 | 0.20 | -174.59 | 302.22 | -0.18 | 0.31 | 388.63 | 0.66 | 0.09  | 0.55 |
| PRECIP   | AQ_UK2_HTAP   | 57 | 0.93 | -0.17 | 0.14 | -153.14 | 254.83 | -0.16 | 0.26 | 336.58 | 0.71 | 0.24  | 0.62 |

| Variable | Model         | n  | FAC2 | FB    | NMSE | MB     | MGE    | NMB   | NMGE | RMSE   | r    | COE   | IOA   |
|----------|---------------|----|------|-------|------|--------|--------|-------|------|--------|------|-------|-------|
| PRECIP   | ED_CHIM       | 56 | 0.91 | -0.08 | 0.17 | -71.14 | 270.52 | -0.07 | 0.28 | 382.92 | 0.50 | 0.19  | 0.59  |
| PRECIP   | ED_CMAQ       | 56 | 0.96 | -0.02 | 0.12 | -21.57 | 247.43 | -0.02 | 0.26 | 326.47 | 0.65 | 0.26  | 0.63  |
| PRECIP   | ED_EMEP       | 56 | 0.91 | -0.08 | 0.17 | -71.14 | 270.52 | -0.07 | 0.28 | 382.92 | 0.50 | 0.19  | 0.59  |
| PRECIP   | ED_LOTO       | 56 | 1.00 | -0.08 | 0.11 | -72.56 | 229.08 | -0.07 | 0.24 | 306.88 | 0.72 | 0.31  | 0.66  |
| PRECIP   | ED_MATCH      | 56 | 0.98 | 0.03  | 0.09 | 29.91  | 215.48 | 0.03  | 0.22 | 298.74 | 0.74 | 0.35  | 0.68  |
| PRECIP   | ED_MINNI      | 56 | 0.91 | -0.08 | 0.17 | -71.14 | 270.52 | -0.07 | 0.28 | 382.92 | 0.50 | 0.19  | 0.59  |
| TNO3_N   | AQ_DE1_HTAP   | 46 | 0.52 | -0.70 | 0.97 | -0.25  | 0.26   | -0.52 | 0.53 | 0.33   | 0.68 | -0.11 | 0.44  |
| TNO3_N   | AQ_DK1_HTAP   | 45 | 0.82 | 0.28  | 0.19 | 0.16   | 0.19   | 0.33  | 0.40 | 0.24   | 0.79 | 0.18  | 0.59  |
| TNO3_N   | AQ_FI1_MACC   | 46 | 0.89 | -0.05 | 0.23 | -0.02  | 0.17   | -0.05 | 0.36 | 0.22   | 0.63 | 0.26  | 0.63  |
| TNO3_N   | AQ_FI1_HTAP   | 46 | 0.80 | 0.23  | 0.22 | 0.13   | 0.19   | 0.26  | 0.40 | 0.25   | 0.69 | 0.18  | 0.59  |
| TNO3_N   | AQ_FRES1_HTAP | 46 | 0.93 | -0.13 | 0.13 | -0.06  | 0.12   | -0.12 | 0.26 | 0.16   | 0.85 | 0.46  | 0.73  |
| TNO3_N   | AQ_UK1_MACC   | 45 | 0.96 | 0.21  | 0.18 | 0.11   | 0.17   | 0.24  | 0.36 | 0.23   | 0.79 | 0.27  | 0.64  |
| TNO3_N   | AQ_UK2_HTAP   | 45 | 0.91 | 0.17  | 0.19 | 0.09   | 0.16   | 0.19  | 0.34 | 0.23   | 0.78 | 0.30  | 0.65  |
| TNO3_N   | ED_CHIM       | 45 | 0.67 | 0.54  | 0.52 | 0.35   | 0.35   | 0.73  | 0.74 | 0.45   | 0.79 | -0.51 | 0.25  |
| TNO3_N   | ED_CMAQ       | 45 | 0.44 | 0.66  | 0.75 | 0.47   | 0.47   | 0.98  | 0.98 | 0.58   | 0.79 | -1.01 | 0.00  |
| TNO3_N   | ED_EMEP       | 45 | 0.89 | 0.24  | 0.19 | 0.13   | 0.19   | 0.28  | 0.39 | 0.23   | 0.77 | 0.20  | 0.60  |
| TNO3_N   | ED_LOTO       | 45 | 0.89 | 0.17  | 0.15 | 0.09   | 0.15   | 0.19  | 0.30 | 0.20   | 0.82 | 0.38  | 0.69  |
| TNO3_N   | ED_MATCH      | 45 | 0.91 | 0.06  | 0.11 | 0.03   | 0.12   | 0.06  | 0.26 | 0.17   | 0.82 | 0.48  | 0.74  |
| TNO3_N   | ED_MINNI      | 45 | 0.91 | 0.20  | 0.16 | 0.11   | 0.17   | 0.22  | 0.35 | 0.22   | 0.80 | 0.29  | 0.65  |
| TNO3_N   | ENSEMBLE      | 45 | 0.87 | 0.23  | 0.15 | 0.13   | 0.17   | 0.26  | 0.35 | 0.21   | 0.82 | 0.29  | 0.64  |
| TNH4_N   | AQ_DE1_HTAP   | 40 | 0.78 | 0.10  | 0.46 | 0.15   | 0.69   | 0.11  | 0.48 | 1.02   | 0.48 | 0.07  | 0.54  |
| TNH4_N   | AQ_DK1_HTAP   | 39 | 0.87 | 0.25  | 0.27 | 0.40   | 0.60   | 0.28  | 0.42 | 0.84   | 0.80 | 0.21  | 0.60  |
| TNH4_N   | AQ_FI1_MACC   | 40 | 0.85 | 0.19  | 0.54 | 0.31   | 0.69   | 0.22  | 0.48 | 1.15   | 0.62 | 0.07  | 0.54  |
| TNH4_N   | AQ_FI1_HTAP   | 40 | 0.88 | 0.23  | 0.51 | 0.36   | 0.66   | 0.26  | 0.46 | 1.14   | 0.64 | 0.11  | 0.56  |
| TNH4_N   | AQ_FRES1_HTAP | 40 | 0.83 | 0.33  | 0.44 | 0.56   | 0.73   | 0.39  | 0.52 | 1.11   | 0.78 | 0.01  | 0.50  |
| TNH4_N   | AQ_UK1_MACC   | 39 | 0.87 | 0.17  | 0.33 | 0.27   | 0.59   | 0.19  | 0.41 | 0.88   | 0.72 | 0.22  | 0.61  |
| TNH4_N   | AQ_UK2_HTAP   | 39 | 0.56 | 0.67  | 1.20 | 1.45   | 1.53   | 1.02  | 1.08 | 2.21   | 0.86 | -1.02 | -0.01 |

| Variable | Model         | n  | FAC2 | FB    | NMSE | MB    | MGE  | NMB   | NMGE | RMSE | r    | COE   | IOA  |
|----------|---------------|----|------|-------|------|-------|------|-------|------|------|------|-------|------|
| TNH4_N   | ED_CHIM       | 39 | 0.82 | 0.25  | 0.27 | 0.40  | 0.59 | 0.28  | 0.41 | 0.84 | 0.79 | 0.23  | 0.61 |
| TNH4_N   | ED_CMAQ       | 39 | 0.72 | 0.37  | 0.51 | 0.64  | 0.84 | 0.45  | 0.59 | 1.22 | 0.68 | -0.11 | 0.44 |
| TNH4_N   | ED_EMEP       | 39 | 0.90 | 0.03  | 0.20 | 0.04  | 0.48 | 0.03  | 0.34 | 0.64 | 0.81 | 0.37  | 0.68 |
| TNH4_N   | ED_LOTO       | 39 | 0.74 | 0.36  | 0.50 | 0.62  | 0.72 | 0.44  | 0.51 | 1.20 | 0.76 | 0.05  | 0.52 |
| TNH4_N   | ED_MATCH      | 39 | 0.82 | -0.08 | 0.23 | -0.12 | 0.48 | -0.08 | 0.34 | 0.66 | 0.80 | 0.36  | 0.68 |
| TNH4_N   | ED_MINNI      | 39 | 0.85 | 0.25  | 0.26 | 0.40  | 0.57 | 0.28  | 0.40 | 0.81 | 0.79 | 0.25  | 0.63 |
| TNH4_N   | ENSEMBLE      | 39 | 0.85 | 0.19  | 0.26 | 0.29  | 0.55 | 0.21  | 0.38 | 0.79 | 0.78 | 0.28  | 0.64 |
| TSO4_S   | AQ_DE1_HTAP   | 20 | 0.75 | 0.32  | 0.49 | 0.30  | 0.44 | 0.39  | 0.57 | 0.64 | 0.73 | -0.47 | 0.27 |
| TSO4_S   | AQ_DK1_HTAP   | 18 | 0.94 | 0.32  | 0.26 | 0.30  | 0.33 | 0.38  | 0.41 | 0.47 | 0.89 | -0.13 | 0.44 |
| TSO4_S   | AQ_FI1_MACC   | 20 | 0.85 | 0.14  | 0.28 | 0.12  | 0.31 | 0.16  | 0.41 | 0.44 | 0.68 | -0.04 | 0.48 |
| TSO4_S   | AQ_FI1_HTAP   | 20 | 0.90 | 0.02  | 0.13 | 0.02  | 0.19 | 0.02  | 0.24 | 0.29 | 0.78 | 0.37  | 0.69 |
| TSO4_S   | AQ_FRES1_HTAP | 20 | 0.90 | 0.04  | 0.17 | 0.03  | 0.23 | 0.04  | 0.30 | 0.33 | 0.70 | 0.24  | 0.62 |
| TSO4_S   | AQ_UK1_MACC   | 19 | 0.89 | 0.23  | 0.25 | 0.20  | 0.27 | 0.26  | 0.36 | 0.42 | 0.71 | 0.11  | 0.56 |
| TSO4_S   | AQ_UK2_HTAP   | 19 | 0.84 | 0.31  | 0.36 | 0.28  | 0.40 | 0.37  | 0.53 | 0.53 | 0.78 | -0.33 | 0.34 |
| TSO4_S   | ED_CHIM       | 18 | 0.89 | -0.02 | 0.24 | -0.02 | 0.23 | -0.02 | 0.29 | 0.38 | 0.81 | 0.20  | 0.60 |
| TSO4_S   | ED_CMAQ       | 18 | 0.78 | 0.49  | 0.56 | 0.51  | 0.56 | 0.65  | 0.71 | 0.75 | 0.86 | -0.93 | 0.04 |
| TSO4_S   | ED_EMEP       | 18 | 0.89 | -0.16 | 0.18 | -0.12 | 0.22 | -0.15 | 0.28 | 0.31 | 0.85 | 0.24  | 0.62 |
| TSO4_S   | ED_LOTO       | 18 | 0.89 | -0.11 | 0.16 | -0.08 | 0.21 | -0.10 | 0.27 | 0.30 | 0.84 | 0.27  | 0.64 |
| TSO4_S   | ED_MATCH      | 18 | 0.89 | -0.12 | 0.14 | -0.09 | 0.22 | -0.11 | 0.28 | 0.28 | 0.86 | 0.25  | 0.62 |
| TSO4_S   | ED_MINNI      | 18 | 0.89 | 0.17  | 0.25 | 0.14  | 0.31 | 0.18  | 0.40 | 0.43 | 0.85 | -0.08 | 0.46 |
| TSO4_S   | ENSEMBLE      | 18 | 0.89 | -0.06 | 0.10 | -0.04 | 0.19 | -0.06 | 0.24 | 0.24 | 0.90 | 0.34  | 0.67 |

### S3.8 . Tables with complete statistics from annual values (definition in S3.10). Common sites

| Variable | Model         | n  | FAC2 | FB    | NMSE | MB      | MGE    | NMB   | NMGE | RMSE   | r    | COE   | IOA  |
|----------|---------------|----|------|-------|------|---------|--------|-------|------|--------|------|-------|------|
| WNO3_N   | AQ_DE1_HTAP   | 10 | 0.00 | -1.50 | 6.99 | -182.27 | 182.27 | -0.86 | 0.86 | 212.33 | 0.73 | -0.93 | 0.04 |
| WNO3_N   | AQ_DK1_HTAP   | 10 | 1.00 | 0.05  | 0.06 | 10.85   | 44.58  | 0.05  | 0.21 | 55.45  | 0.91 | 0.53  | 0.76 |
| WNO3_N   | AQ_FI1_MACC   | 10 | 0.60 | -0.50 | 0.44 | -85.55  | 88.51  | -0.40 | 0.42 | 109.07 | 0.85 | 0.06  | 0.53 |
| WNO3_N   | AQ_FI1_HTAP   | 10 | 0.90 | -0.12 | 0.13 | -24.26  | 53.33  | -0.11 | 0.25 | 71.96  | 0.84 | 0.44  | 0.72 |
| WNO3_N   | AQ_FRES1_HTAP | 10 | 1.00 | -0.35 | 0.26 | -62.88  | 65.40  | -0.30 | 0.31 | 91.18  | 0.87 | 0.31  | 0.65 |
| WNO3_N   | AQ_UK1_MACC   | 10 | 0.50 | -0.48 | 0.60 | -81.64  | 110.23 | -0.38 | 0.52 | 129.09 | 0.58 | -0.17 | 0.42 |
| WNO3_N   | AQ_UK2_HTAP   | 10 | 0.80 | -0.33 | 0.29 | -59.79  | 75.59  | -0.28 | 0.36 | 96.92  | 0.77 | 0.20  | 0.60 |
| WNO3_N   | ED_CHIM       | 10 | 1.00 | -0.26 | 0.18 | -48.95  | 50.57  | -0.23 | 0.24 | 79.37  | 0.88 | 0.47  | 0.73 |
| WNO3_N   | ED_CMAQ       | 10 | 1.00 | -0.16 | 0.15 | -31.91  | 61.28  | -0.15 | 0.29 | 75.29  | 0.82 | 0.35  | 0.68 |
| WNO3_N   | ED_EMEP       | 10 | 1.00 | 0.11  | 0.12 | 23.99   | 61.58  | 0.11  | 0.29 | 78.24  | 0.86 | 0.35  | 0.67 |
| WNO3_N   | ED_LOTO       | 10 | 0.80 | -0.27 | 0.17 | -50.93  | 60.31  | -0.24 | 0.28 | 75.66  | 0.88 | 0.36  | 0.68 |
| WNO3_N   | ED_MATCH      | 10 | 1.00 | 0.21  | 0.21 | 48.61   | 80.02  | 0.23  | 0.38 | 107.57 | 0.84 | 0.15  | 0.58 |
| WNO3_N   | ED_MINNI      | 10 | 0.00 | -1.12 | 2.57 | -153.06 | 153.06 | -0.72 | 0.72 | 180.23 | 0.82 | -0.62 | 0.19 |
| WNO3_N   | ENSEMBLE      | 10 | 1.00 | -0.09 | 0.08 | -18.04  | 40.45  | -0.08 | 0.19 | 56.60  | 0.89 | 0.57  | 0.79 |
| HNO3_N   | AQ_DE1_HTAP   | 10 | 0.10 | -1.27 | 5.94 | -0.13   | 0.13   | -0.78 | 0.82 | 0.19   | 0.29 | -0.07 | 0.46 |
| HNO3_N   | AQ_DK1_HTAP   | 10 | 0.60 | -0.49 | 1.19 | -0.06   | 0.09   | -0.40 | 0.55 | 0.14   | 0.53 | 0.27  | 0.64 |
| HNO3_N   | AQ_FI1_MACC   | 10 | 0.40 | -0.95 | 3.02 | -0.11   | 0.12   | -0.65 | 0.71 | 0.17   | 0.50 | 0.06  | 0.53 |
| HNO3_N   | AQ_FI1_HTAP   | 10 | 0.60 | -0.60 | 1.50 | -0.08   | 0.10   | -0.46 | 0.61 | 0.15   | 0.52 | 0.20  | 0.60 |
| HNO3_N   | AQ_FRES1_HTAP | 10 | 0.50 | -0.67 | 1.86 | -0.08   | 0.10   | -0.50 | 0.62 | 0.16   | 0.38 | 0.18  | 0.59 |
| HNO3_N   | AQ_UK1_MACC   | 10 | 0.70 | -0.39 | 1.08 | -0.05   | 0.09   | -0.32 | 0.56 | 0.14   | 0.44 | 0.27  | 0.64 |
| HNO3_N   | AQ_UK2_HTAP   | 10 | 0.40 | -0.86 | 2.56 | -0.10   | 0.11   | -0.60 | 0.69 | 0.17   | 0.40 | 0.09  | 0.55 |
| HNO3_N   | ED_CHIM       | 10 | 0.50 | -0.31 | 1.13 | -0.04   | 0.10   | -0.27 | 0.62 | 0.15   | 0.31 | 0.19  | 0.59 |
| HNO3_N   | ED_CMAQ       | 10 | 0.60 | -0.18 | 0.84 | -0.03   | 0.09   | -0.16 | 0.56 | 0.14   | 0.41 | 0.26  | 0.63 |
| HNO3_N   | ED_EMEP       | 10 | 0.30 | -0.83 | 2.29 | -0.10   | 0.12   | -0.59 | 0.72 | 0.16   | 0.49 | 0.05  | 0.53 |
| HNO3_N   | ED_LOTO       | 10 | 0.50 | -0.63 | 1.60 | -0.08   | 0.11   | -0.48 | 0.65 | 0.15   | 0.47 | 0.14  | 0.57 |

| Variable | Model         | n  | FAC2 | FB    | NMSE | MB      | MGE    | NMB   | NMGE | RMSE   | r    | COE   | IOA   |
|----------|---------------|----|------|-------|------|---------|--------|-------|------|--------|------|-------|-------|
| HNO3_N   | ED_MATCH      | 10 | 0.60 | -0.36 | 1.19 | -0.05   | 0.11   | -0.30 | 0.69 | 0.15   | 0.27 | 0.10  | 0.55  |
| HNO3_N   | ED_MINNI      | 10 | 0.40 | -0.66 | 1.91 | -0.08   | 0.11   | -0.50 | 0.69 | 0.16   | 0.29 | 0.10  | 0.55  |
| HNO3_N   | ENSEMBLE      | 10 | 0.60 | -0.58 | 1.50 | -0.07   | 0.10   | -0.45 | 0.61 | 0.15   | 0.45 | 0.20  | 0.60  |
| PM_NO3_N | AQ_DE1_HTAP   | 10 | 0.70 | -0.46 | 0.64 | -0.13   | 0.14   | -0.37 | 0.39 | 0.22   | 0.67 | 0.26  | 0.63  |
| PM_NO3_N | AQ_DK1_HTAP   | 10 | 0.80 | 0.44  | 0.34 | 0.20    | 0.22   | 0.56  | 0.61 | 0.26   | 0.79 | -0.18 | 0.41  |
| PM_NO3_N | AQ_FI1_MACC   | 10 | 0.90 | -0.12 | 0.23 | -0.04   | 0.11   | -0.12 | 0.31 | 0.16   | 0.76 | 0.39  | 0.70  |
| PM_NO3_N | AQ_FI1_HTAP   | 10 | 0.90 | 0.18  | 0.14 | 0.07    | 0.11   | 0.19  | 0.31 | 0.15   | 0.84 | 0.41  | 0.70  |
| PM_NO3_N | AQ_FRES1_HTAP | 10 | 0.70 | 0.18  | 0.16 | 0.07    | 0.12   | 0.20  | 0.34 | 0.15   | 0.85 | 0.34  | 0.67  |
| PM_NO3_N | AQ_UK1_MACC   | 10 | 0.70 | 0.30  | 0.32 | 0.12    | 0.18   | 0.35  | 0.50 | 0.23   | 0.70 | 0.03  | 0.52  |
| PM_NO3_N | AQ_UK2_HTAP   | 10 | 0.60 | 0.36  | 0.53 | 0.15    | 0.24   | 0.44  | 0.69 | 0.31   | 0.55 | -0.33 | 0.34  |
| PM_NO3_N | ED_CHIM       | 10 | 0.50 | 0.68  | 0.79 | 0.36    | 0.37   | 1.03  | 1.04 | 0.45   | 0.71 | -1.01 | 0.00  |
| PM_NO3_N | ED_CMAQ       | 10 | 0.40 | 0.77  | 1.03 | 0.44    | 0.45   | 1.26  | 1.26 | 0.54   | 0.78 | -1.43 | -0.18 |
| PM_NO3_N | ED_EMEP       | 10 | 0.70 | 0.34  | 0.31 | 0.14    | 0.19   | 0.41  | 0.53 | 0.23   | 0.70 | -0.03 | 0.48  |
| PM_NO3_N | ED_LOTO       | 10 | 0.90 | 0.45  | 0.35 | 0.20    | 0.21   | 0.58  | 0.59 | 0.26   | 0.93 | -0.14 | 0.43  |
| PM_NO3_N | ED_MATCH      | 10 | 0.90 | 0.08  | 0.21 | 0.03    | 0.12   | 0.09  | 0.35 | 0.17   | 0.72 | 0.33  | 0.66  |
| PM_NO3_N | ED_MINNI      | 10 | 0.70 | 0.41  | 0.35 | 0.18    | 0.21   | 0.52  | 0.59 | 0.26   | 0.76 | -0.14 | 0.43  |
| PM_NO3_N | ENSEMBLE      | 10 | 0.80 | 0.33  | 0.23 | 0.14    | 0.17   | 0.39  | 0.47 | 0.20   | 0.82 | 0.09  | 0.55  |
| WNH4_N   | AQ_DE1_HTAP   | 9  | 0.44 | -0.76 | 1.06 | -170.51 | 170.51 | -0.55 | 0.55 | 215.16 | 0.55 | -0.55 | 0.23  |
| WNH4_N   | AQ_DK1_HTAP   | 9  | 0.89 | 0.18  | 0.30 | 63.05   | 137.57 | 0.20  | 0.44 | 186.71 | 0.82 | -0.25 | 0.38  |
| WNH4_N   | AQ_FI1_MACC   | 9  | 0.89 | 0.05  | 0.22 | 14.57   | 113.54 | 0.05  | 0.37 | 149.34 | 0.83 | -0.03 | 0.48  |
| WNH4_N   | AQ_FI1_HTAP   | 9  | 0.89 | 0.07  | 0.24 | 22.81   | 118.26 | 0.07  | 0.38 | 158.39 | 0.82 | -0.07 | 0.46  |
| WNH4_N   | AQ_FRES1_HTAP | 9  | 0.33 | -0.55 | 0.52 | -133.56 | 141.45 | -0.43 | 0.46 | 169.61 | 0.79 | -0.28 | 0.36  |
| WNH4_N   | AQ_UK1_MACC   | 9  | 0.67 | -0.43 | 0.51 | -110.16 | 159.01 | -0.35 | 0.51 | 177.79 | 0.55 | -0.44 | 0.28  |
| WNH4_N   | AQ_UK2_HTAP   | 9  | 0.89 | -0.12 | 0.22 | -35.30  | 102.05 | -0.11 | 0.33 | 137.08 | 0.67 | 0.07  | 0.54  |
| WNH4_N   | ED_CHIM       | 9  | 0.78 | -0.13 | 0.23 | -37.29  | 117.57 | -0.12 | 0.38 | 140.77 | 0.66 | -0.07 | 0.47  |
| WNH4_N   | ED_CMAQ       | 9  | 0.78 | -0.40 | 0.29 | -102.82 | 103.72 | -0.33 | 0.33 | 135.97 | 0.80 | 0.06  | 0.53  |
| WNH4_N   | ED_EMEP       | 9  | 0.89 | 0.23  | 0.22 | 82.66   | 135.40 | 0.27  | 0.44 | 165.63 | 0.81 | -0.23 | 0.39  |

| Variable | Model         | n | FAC2 | FB    | NMSE | MB      | MGE    | NMB   | NMGE | RMSE   | r    | COE   | IOA   |
|----------|---------------|---|------|-------|------|---------|--------|-------|------|--------|------|-------|-------|
| WNH4_N   | ED_LOTO       | 9 | 0.89 | -0.07 | 0.19 | -20.34  | 111.97 | -0.07 | 0.36 | 132.33 | 0.82 | -0.02 | 0.49  |
| WNH4_N   | ED_MATCH      | 9 | 0.78 | 0.38  | 0.61 | 146.90  | 191.90 | 0.47  | 0.62 | 295.22 | 0.83 | -0.74 | 0.13  |
| WNH4_N   | ED_MINNI      | 9 | 0.56 | -0.63 | 0.65 | -149.29 | 149.29 | -0.48 | 0.48 | 181.22 | 0.81 | -0.36 | 0.32  |
| WNH4_N   | ENSEMBLE      | 9 | 0.89 | 0.12  | 0.23 | 38.91   | 117.59 | 0.13  | 0.38 | 158.33 | 0.82 | -0.07 | 0.47  |
| NH3_N    | AQ_DE1_HTAP   | 9 | 0.44 | 0.57  | 0.76 | 0.62    | 0.77   | 0.79  | 0.99 | 0.91   | 0.15 | -0.85 | 0.08  |
| NH3_N    | AQ_DK1_HTAP   | 9 | 0.67 | 0.64  | 0.88 | 0.74    | 0.74   | 0.94  | 0.94 | 1.02   | 0.80 | -0.77 | 0.11  |
| NH3_N    | AQ_FI1_MACC   | 9 | 0.44 | 0.94  | 2.98 | 1.38    | 1.38   | 1.77  | 1.77 | 2.24   | 0.73 | -2.31 | -0.40 |
| NH3_N    | AQ_FI1_HTAP   | 9 | 0.56 | 0.93  | 2.88 | 1.37    | 1.37   | 1.75  | 1.75 | 2.19   | 0.74 | -2.28 | -0.39 |
| NH3_N    | AQ_FRES1_HTAP | 9 | 0.56 | 0.77  | 1.71 | 0.97    | 0.97   | 1.24  | 1.24 | 1.53   | 0.77 | -1.33 | -0.14 |
| NH3_N    | AQ_UK1_MACC   | 9 | 0.78 | 0.59  | 1.32 | 0.66    | 0.67   | 0.85  | 0.86 | 1.22   | 0.74 | -0.61 | 0.19  |
| NH3_N    | AQ_UK2_HTAP   | 9 | 0.44 | 1.02  | 2.68 | 1.62    | 1.63   | 2.08  | 2.09 | 2.24   | 0.83 | -2.92 | -0.49 |
| NH3_N    | ED_CHIM       | 9 | 0.78 | 0.37  | 0.26 | 0.35    | 0.40   | 0.45  | 0.51 | 0.48   | 0.91 | 0.05  | 0.52  |
| NH3_N    | ED_CMAQ       | 9 | 0.67 | 0.52  | 1.21 | 0.55    | 0.60   | 0.71  | 0.77 | 1.12   | 0.46 | -0.44 | 0.28  |
| NH3_N    | ED_EMEP       | 9 | 0.89 | 0.19  | 0.14 | 0.16    | 0.25   | 0.21  | 0.32 | 0.32   | 0.89 | 0.40  | 0.70  |
| NH3_N    | ED_LOTO       | 9 | 0.44 | 0.84  | 1.86 | 1.12    | 1.12   | 1.44  | 1.44 | 1.66   | 0.89 | -1.69 | -0.26 |
| NH3_N    | ED_MATCH      | 9 | 0.67 | 0.29  | 0.36 | 0.26    | 0.37   | 0.34  | 0.48 | 0.54   | 0.73 | 0.10  | 0.55  |
| NH3_N    | ED_MINNI      | 9 | 0.56 | 0.49  | 0.41 | 0.51    | 0.53   | 0.65  | 0.67 | 0.64   | 0.85 | -0.26 | 0.37  |
| NH3_N    | ENSEMBLE      | 9 | 0.67 | 0.66  | 1.06 | 0.77    | 0.77   | 0.98  | 0.98 | 1.13   | 0.82 | -0.85 | 0.08  |
| PM_NH4_N | AQ_DE1_HTAP   | 9 | 1.00 | -0.17 | 0.15 | -0.13   | 0.24   | -0.16 | 0.29 | 0.30   | 0.74 | 0.27  | 0.63  |
| PM_NH4_N | AQ_DK1_HTAP   | 9 | 0.67 | 0.11  | 0.12 | 0.09    | 0.28   | 0.11  | 0.33 | 0.31   | 0.67 | 0.16  | 0.58  |
| PM_NH4_N | AQ_FI1_MACC   | 9 | 0.78 | -0.27 | 0.27 | -0.20   | 0.27   | -0.24 | 0.32 | 0.38   | 0.58 | 0.20  | 0.60  |
| PM_NH4_N | AQ_FI1_HTAP   | 9 | 1.00 | -0.14 | 0.14 | -0.11   | 0.24   | -0.13 | 0.28 | 0.29   | 0.74 | 0.29  | 0.64  |
| PM_NH4_N | AQ_FRES1_HTAP | 9 | 0.67 | 0.27  | 0.16 | 0.26    | 0.32   | 0.32  | 0.39 | 0.39   | 0.70 | 0.03  | 0.52  |
| PM_NH4_N | AQ_UK1_MACC   | 9 | 0.78 | 0.17  | 0.15 | 0.15    | 0.28   | 0.19  | 0.34 | 0.35   | 0.67 | 0.16  | 0.58  |
| PM_NH4_N | AQ_UK2_HTAP   | 9 | 0.67 | 0.24  | 0.27 | 0.23    | 0.42   | 0.28  | 0.51 | 0.49   | 0.50 | -0.27 | 0.36  |
| PM_NH4_N | ED_CHIM       | 9 | 0.67 | 0.40  | 0.27 | 0.42    | 0.43   | 0.51  | 0.52 | 0.53   | 0.54 | -0.30 | 0.35  |
| PM_NH4_N | ED_CMAQ       | 9 | 0.56 | 0.55  | 0.40 | 0.64    | 0.64   | 0.77  | 0.77 | 0.70   | 0.80 | -0.92 | 0.04  |



| Variable | Model         | n  | FAC2 | FB    | NMSE | MB      | MGE    | NMB   | NMGE | RMSE   | r    | COE   | IOA   |
|----------|---------------|----|------|-------|------|---------|--------|-------|------|--------|------|-------|-------|
| PM_NH4_N | ED_EMEP       | 9  | 0.78 | 0.07  | 0.15 | 0.06    | 0.29   | 0.07  | 0.35 | 0.34   | 0.55 | 0.12  | 0.56  |
| PM_NH4_N | ED_LOTO       | 9  | 0.67 | 0.18  | 0.14 | 0.17    | 0.29   | 0.20  | 0.35 | 0.34   | 0.70 | 0.14  | 0.57  |
| PM_NH4_N | ED_MATCH      | 9  | 0.67 | -0.16 | 0.24 | -0.12   | 0.34   | -0.15 | 0.41 | 0.38   | 0.40 | -0.03 | 0.49  |
| PM_NH4_N | ED_MINNI      | 9  | 0.67 | 0.29  | 0.20 | 0.28    | 0.35   | 0.34  | 0.42 | 0.43   | 0.59 | -0.06 | 0.47  |
| PM_NH4_N | ENSEMBLE      | 9  | 0.67 | 0.05  | 0.11 | 0.05    | 0.25   | 0.05  | 0.30 | 0.29   | 0.72 | 0.24  | 0.62  |
| WSO4_S   | AQ_DE1_HTAP   | 12 | 0.75 | -0.23 | 0.24 | -38.52  | 70.62  | -0.21 | 0.38 | 81.29  | 0.80 | 0.22  | 0.61  |
| WSO4_S   | AQ_DK1_HTAP   | 11 | 0.55 | -0.52 | 0.37 | -78.17  | 78.17  | -0.41 | 0.41 | 89.10  | 0.93 | 0.19  | 0.60  |
| WSO4_S   | AQ_FI1_MACC   | 12 | 0.75 | -0.24 | 0.24 | -39.46  | 71.22  | -0.21 | 0.38 | 80.97  | 0.91 | 0.21  | 0.61  |
| WSO4_S   | AQ_FI1_HTAP   | 12 | 0.75 | -0.30 | 0.23 | -48.80  | 62.89  | -0.26 | 0.34 | 76.74  | 0.91 | 0.31  | 0.65  |
| WSO4_S   | AQ_FRES1_HTAP | 12 | 0.33 | -0.69 | 0.67 | -96.36  | 96.36  | -0.51 | 0.51 | 106.94 | 0.95 | -0.06 | 0.47  |
| WSO4_S   | AQ_UK1_MACC   | 12 | 0.75 | 0.11  | 0.23 | 22.26   | 67.19  | 0.12  | 0.36 | 94.49  | 0.70 | 0.26  | 0.63  |
| WSO4_S   | AQ_UK2_HTAP   | 12 | 0.75 | 0.42  | 0.35 | 99.31   | 112.18 | 0.53  | 0.60 | 137.54 | 0.86 | -0.24 | 0.38  |
| WSO4_S   | ED_CHIM       | 11 | 0.27 | -0.92 | 1.66 | -120.24 | 120.24 | -0.63 | 0.63 | 148.52 | 0.77 | -0.24 | 0.38  |
| WSO4_S   | ED_CMAQ       | 11 | 0.91 | 0.15  | 0.14 | 30.22   | 63.91  | 0.16  | 0.34 | 75.67  | 0.83 | 0.34  | 0.67  |
| WSO4_S   | ED_EMEP       | 11 | 0.91 | 0.25  | 0.30 | 54.41   | 83.57  | 0.29  | 0.44 | 118.38 | 0.87 | 0.14  | 0.57  |
| WSO4_S   | ED_LOTO       | 11 | 0.82 | -0.08 | 0.13 | -15.37  | 53.06  | -0.08 | 0.28 | 64.85  | 0.96 | 0.45  | 0.73  |
| WSO4_S   | ED_MATCH      | 11 | 0.55 | 0.62  | 1.06 | 172.30  | 176.94 | 0.91  | 0.93 | 270.30 | 0.95 | -0.83 | 0.09  |
| WSO4_S   | ED_MINNI      | 11 | 0.27 | -0.79 | 1.00 | -107.94 | 109.69 | -0.57 | 0.58 | 125.14 | 0.85 | -0.13 | 0.43  |
| WSO4_S   | ENSEMBLE      | 11 | 0.91 | 0.13  | 0.22 | 25.68   | 67.68  | 0.13  | 0.36 | 94.15  | 0.94 | 0.30  | 0.65  |
| SO2_S    | AQ_DE1_HTAP   | 12 | 0.42 | 0.75  | 2.04 | 0.40    | 0.45   | 1.19  | 1.33 | 0.71   | 0.71 | -1.48 | -0.19 |
| SO2_S    | AQ_DK1_HTAP   | 11 | 0.91 | 0.23  | 0.26 | 0.09    | 0.14   | 0.26  | 0.40 | 0.21   | 0.87 | 0.20  | 0.60  |
| SO2_S    | AQ_FI1_MACC   | 12 | 0.58 | 0.62  | 1.04 | 0.30    | 0.33   | 0.91  | 0.99 | 0.47   | 0.56 | -0.86 | 0.07  |
| SO2_S    | AQ_FI1_HTAP   | 12 | 0.83 | 0.43  | 0.58 | 0.18    | 0.21   | 0.55  | 0.63 | 0.32   | 0.64 | -0.18 | 0.41  |
| SO2_S    | AQ_FRES1_HTAP | 12 | 0.58 | 0.02  | 0.74 | 0.01    | 0.18   | 0.02  | 0.54 | 0.29   | 0.43 | -0.01 | 0.49  |
| SO2_S    | AQ_UK1_MACC   | 12 | 0.75 | 0.59  | 1.12 | 0.28    | 0.31   | 0.85  | 0.92 | 0.48   | 0.52 | -0.72 | 0.14  |
| SO2_S    | AQ_UK2_HTAP   | 12 | 0.33 | 0.70  | 1.37 | 0.36    | 0.40   | 1.08  | 1.18 | 0.57   | 0.72 | -1.21 | -0.10 |
| SO2_S    | ED_CHIM       | 11 | 0.55 | 0.35  | 1.30 | 0.15    | 0.29   | 0.43  | 0.83 | 0.49   | 0.69 | -0.64 | 0.18  |

| Variable | Model         | n  | FAC2 | FB    | NMSE | MB    | MGE  | NMB   | NMGE | RMSE | r    | COE   | IOA   |
|----------|---------------|----|------|-------|------|-------|------|-------|------|------|------|-------|-------|
| SO2_S    | ED_CMAQ       | 11 | 0.27 | 0.76  | 2.14 | 0.44  | 0.50 | 1.24  | 1.40 | 0.78 | 0.73 | -1.79 | -0.28 |
| SO2_S    | ED_EMEP       | 11 | 0.36 | -0.21 | 0.67 | -0.07 | 0.21 | -0.19 | 0.58 | 0.26 | 0.73 | -0.14 | 0.43  |
| SO2_S    | ED_LOTO       | 11 | 0.64 | 0.21  | 0.77 | 0.08  | 0.20 | 0.24  | 0.55 | 0.35 | 0.75 | -0.10 | 0.45  |
| SO2_S    | ED_MATCH      | 11 | 0.64 | 0.20  | 0.56 | 0.08  | 0.21 | 0.22  | 0.58 | 0.29 | 0.74 | -0.16 | 0.42  |
| SO2_S    | ED_MINNI      | 11 | 0.36 | 0.57  | 1.17 | 0.28  | 0.37 | 0.80  | 1.03 | 0.52 | 0.73 | -1.05 | -0.02 |
| SO2_S    | ENSEMBLE      | 11 | 0.73 | 0.22  | 0.37 | 0.09  | 0.18 | 0.25  | 0.50 | 0.24 | 0.82 | 0.02  | 0.51  |
| PM_SO4_S | AQ_DE1_HTAP   | 12 | 0.92 | 0.06  | 0.05 | 0.03  | 0.08 | 0.07  | 0.20 | 0.10 | 0.92 | 0.60  | 0.80  |
| PM_SO4_S | AQ_DK1_HTAP   | 11 | 0.73 | 0.45  | 0.44 | 0.26  | 0.27 | 0.59  | 0.61 | 0.37 | 0.90 | -0.42 | 0.29  |
| PM_SO4_S | AQ_FI1_MACC   | 12 | 0.50 | -0.32 | 0.23 | -0.11 | 0.14 | -0.28 | 0.34 | 0.17 | 0.86 | 0.31  | 0.66  |
| PM_SO4_S | AQ_FI1_HTAP   | 12 | 0.50 | -0.40 | 0.30 | -0.14 | 0.16 | -0.33 | 0.39 | 0.19 | 0.85 | 0.20  | 0.60  |
| PM_SO4_S | AQ_FRES1_HTAP | 12 | 0.92 | 0.17  | 0.09 | 0.08  | 0.11 | 0.18  | 0.26 | 0.13 | 0.92 | 0.46  | 0.73  |
| PM_SO4_S | AQ_UK1_MACC   | 12 | 0.75 | -0.01 | 0.07 | 0.00  | 0.08 | -0.01 | 0.19 | 0.11 | 0.89 | 0.61  | 0.80  |
| PM_SO4_S | AQ_UK2_HTAP   | 12 | 0.83 | -0.05 | 0.08 | -0.02 | 0.09 | -0.05 | 0.22 | 0.11 | 0.89 | 0.55  | 0.77  |
| PM_SO4_S | ED_CHIM       | 11 | 0.91 | -0.29 | 0.17 | -0.11 | 0.13 | -0.25 | 0.30 | 0.16 | 0.89 | 0.30  | 0.65  |
| PM_SO4_S | ED_CMAQ       | 11 | 0.73 | 0.24  | 0.12 | 0.12  | 0.14 | 0.27  | 0.32 | 0.18 | 0.83 | 0.26  | 0.63  |
| PM_SO4_S | ED_EMEP       | 11 | 1.00 | -0.05 | 0.08 | -0.02 | 0.09 | -0.05 | 0.19 | 0.12 | 0.91 | 0.55  | 0.78  |
| PM_SO4_S | ED_LOTO       | 11 | 0.82 | -0.30 | 0.22 | -0.11 | 0.14 | -0.26 | 0.31 | 0.18 | 0.80 | 0.27  | 0.64  |
| PM_SO4_S | ED_MATCH      | 11 | 0.64 | -0.44 | 0.30 | -0.16 | 0.17 | -0.36 | 0.38 | 0.19 | 0.89 | 0.12  | 0.56  |
| PM_SO4_S | ED_MINNI      | 11 | 0.91 | -0.17 | 0.08 | -0.07 | 0.08 | -0.16 | 0.19 | 0.11 | 0.93 | 0.56  | 0.78  |
| PM_SO4_S | ENSEMBLE      | 11 | 0.91 | -0.31 | 0.14 | -0.12 | 0.12 | -0.27 | 0.28 | 0.14 | 0.94 | 0.35  | 0.68  |

### S3.9 Monthly values of WNO3\_N, WNH4\_N, WSO4\_S and precipitation

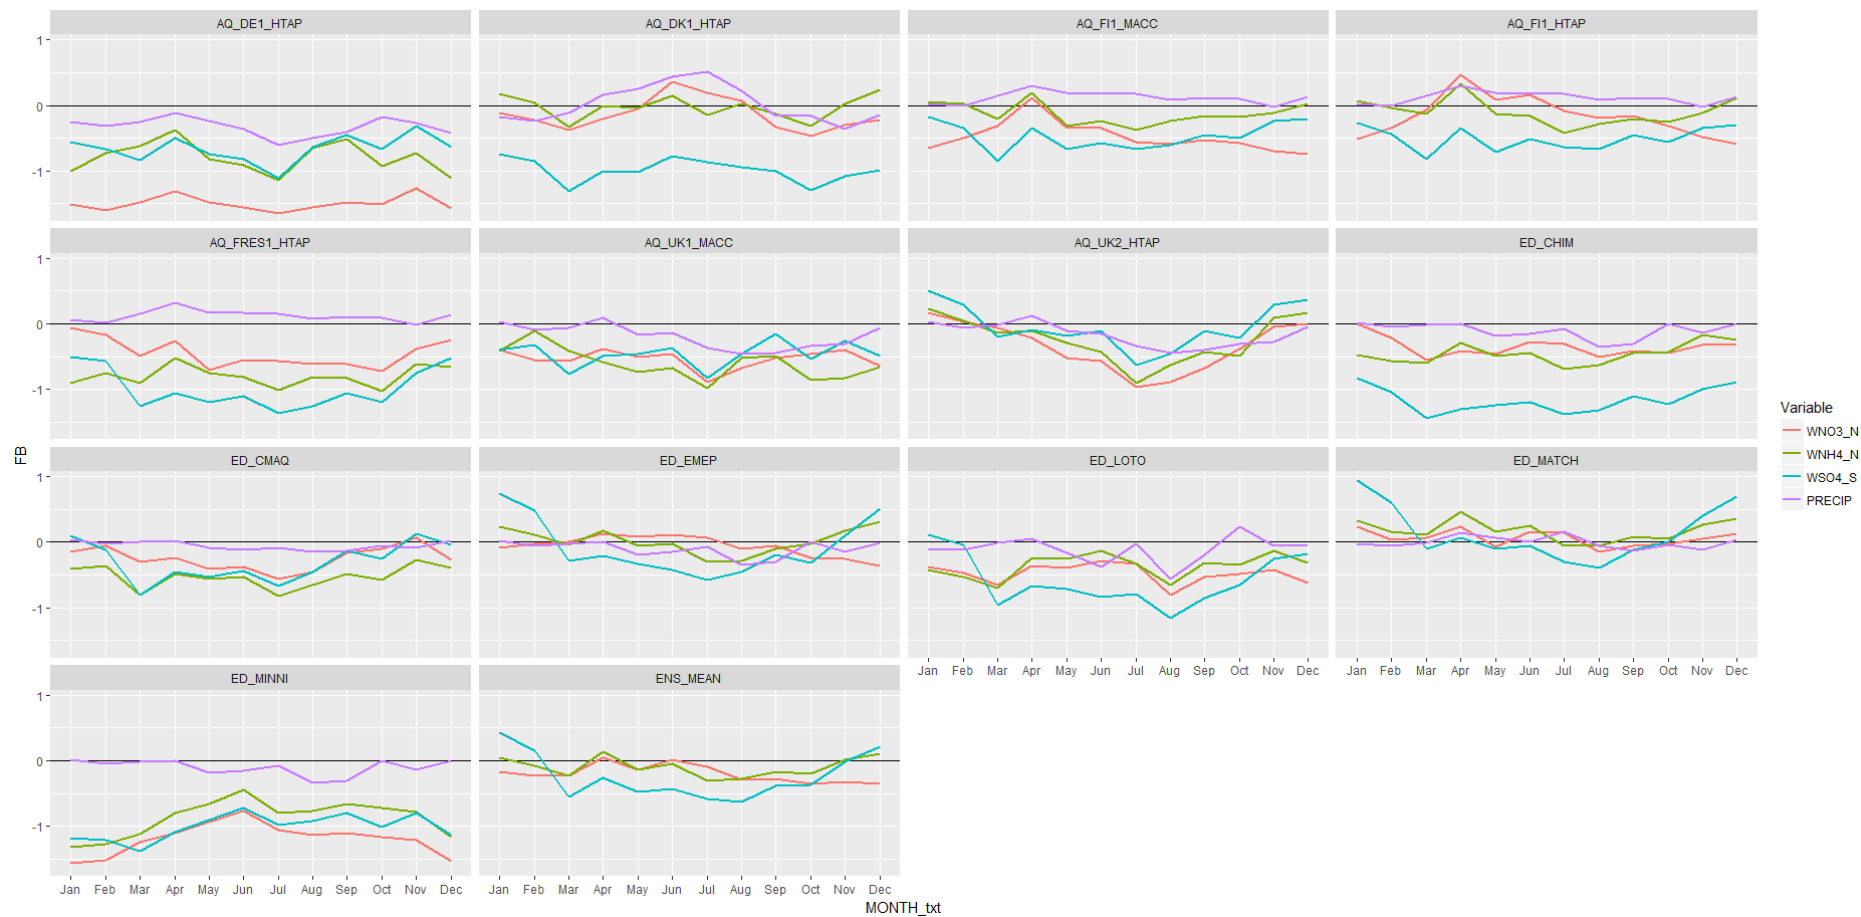

### S3.10 Definition of statistical metrics in S3.6, 3.7 and 3.8

*Mean Gross Error, MGE*

$$\text{MGE} = \frac{1}{n} \sum_1^n |M - O|$$

*Root Mean Square Error, RMSE*

$$\text{RMSE} = \sqrt{\frac{\sum_1^n (M - O)^2}{n}}$$

*Normalized Mean Bias, NMB*

$$\text{NMB} = \frac{\sum_1^n (M - O)}{\sum_1^n (O)}$$

*Normalized Mean Gross Error, NMGE*

$$\text{NMGE} = \frac{\sum_1^n |M - O|}{\sum_1^n (O)}$$

*Correlation Coefficient, r*

$$r = \frac{1}{(n-1)} \sum_1^n \left( \left( \frac{O - \bar{O}}{\sigma_o} \right) * \left( \frac{M - \bar{M}}{\sigma_m} \right) \right)$$

*Index of Agreement, IOA*

$$\text{IOA} = 1 - \left[ \frac{\sum_1^n (O - M)^2}{\sum_1^n (|M - \bar{O}| + |O - \bar{O}|)^2} \right]$$

## **S4. Gas/particle contribution**

# HNO3\_N:TNO3\_N

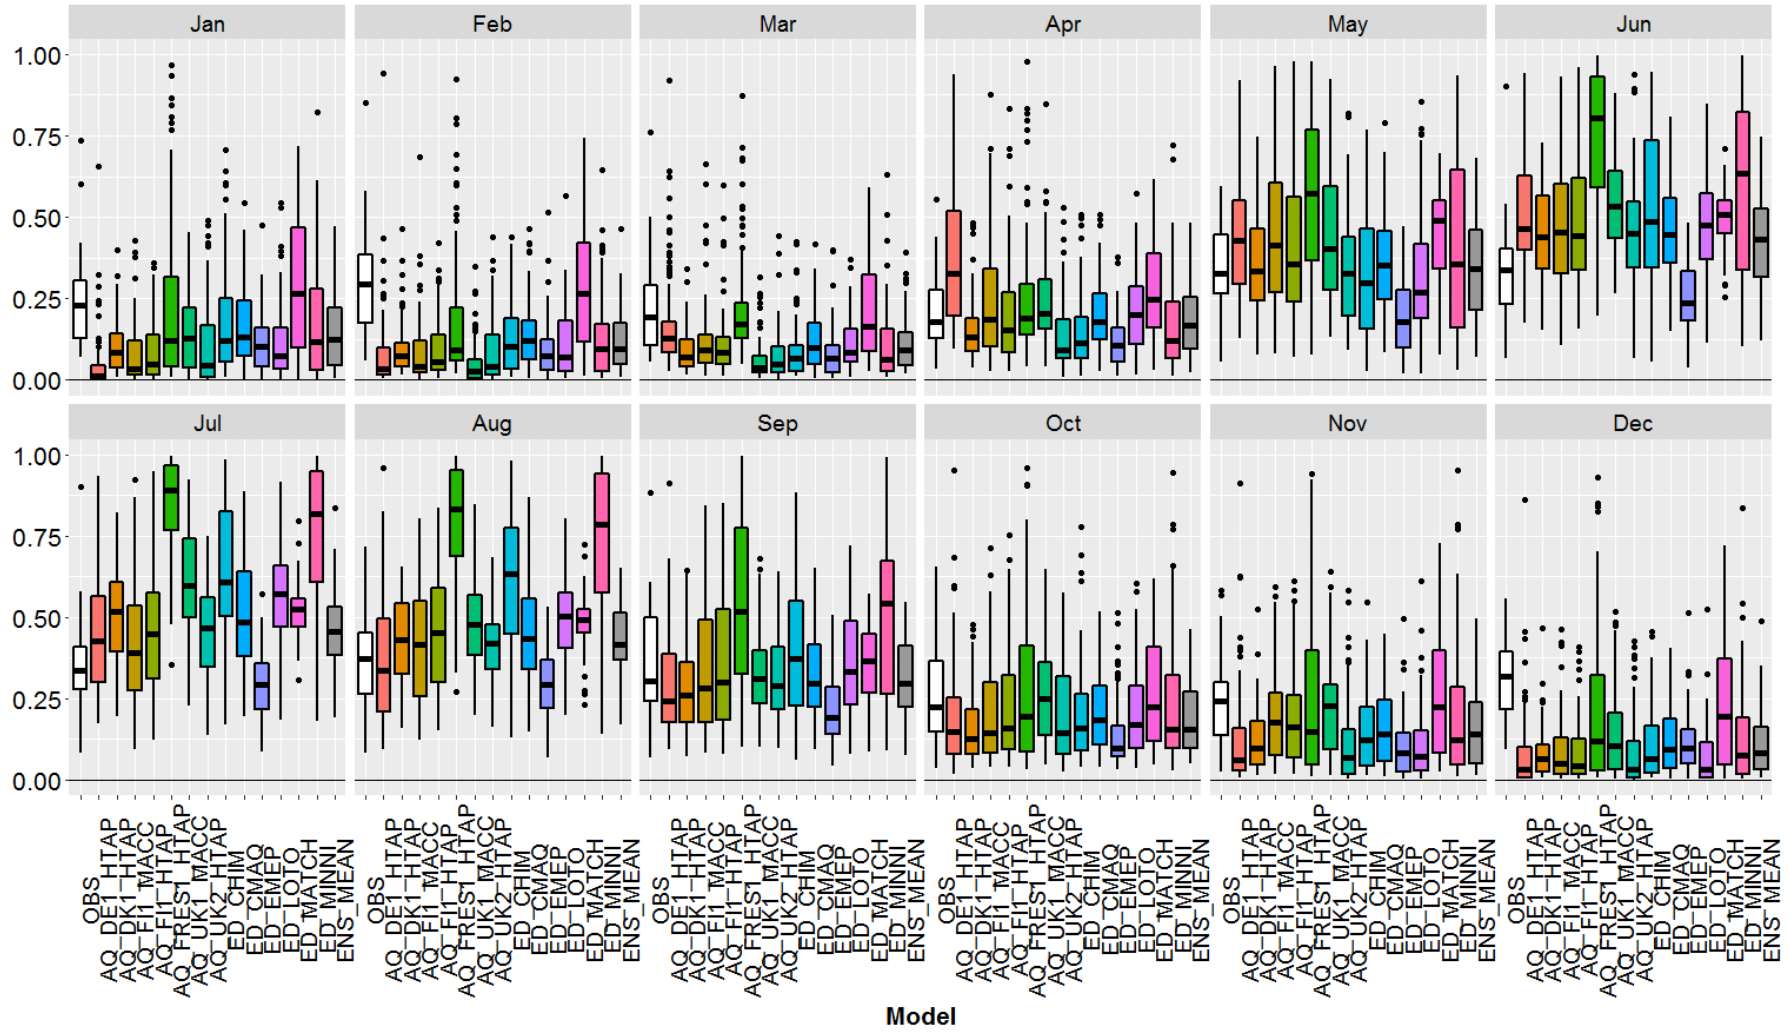

# NH3\_N:TNH4\_N

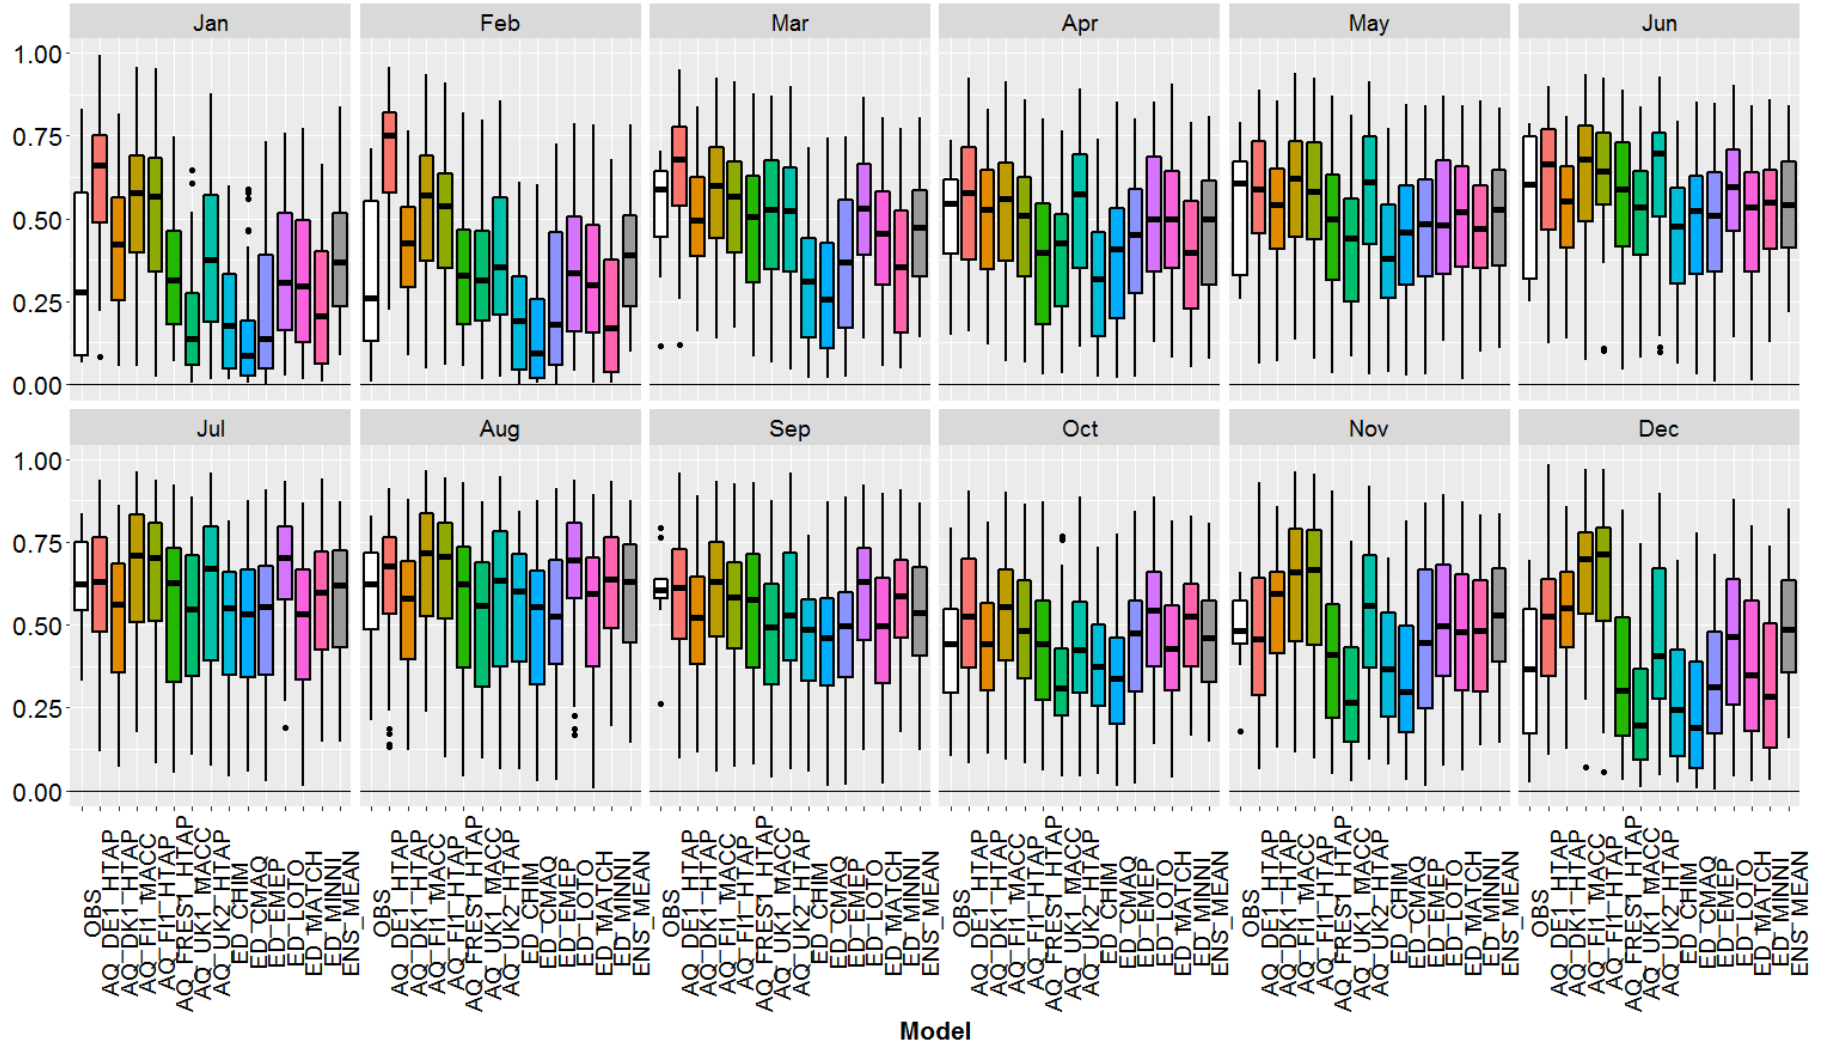



# SO2\_S:TSO4\_S

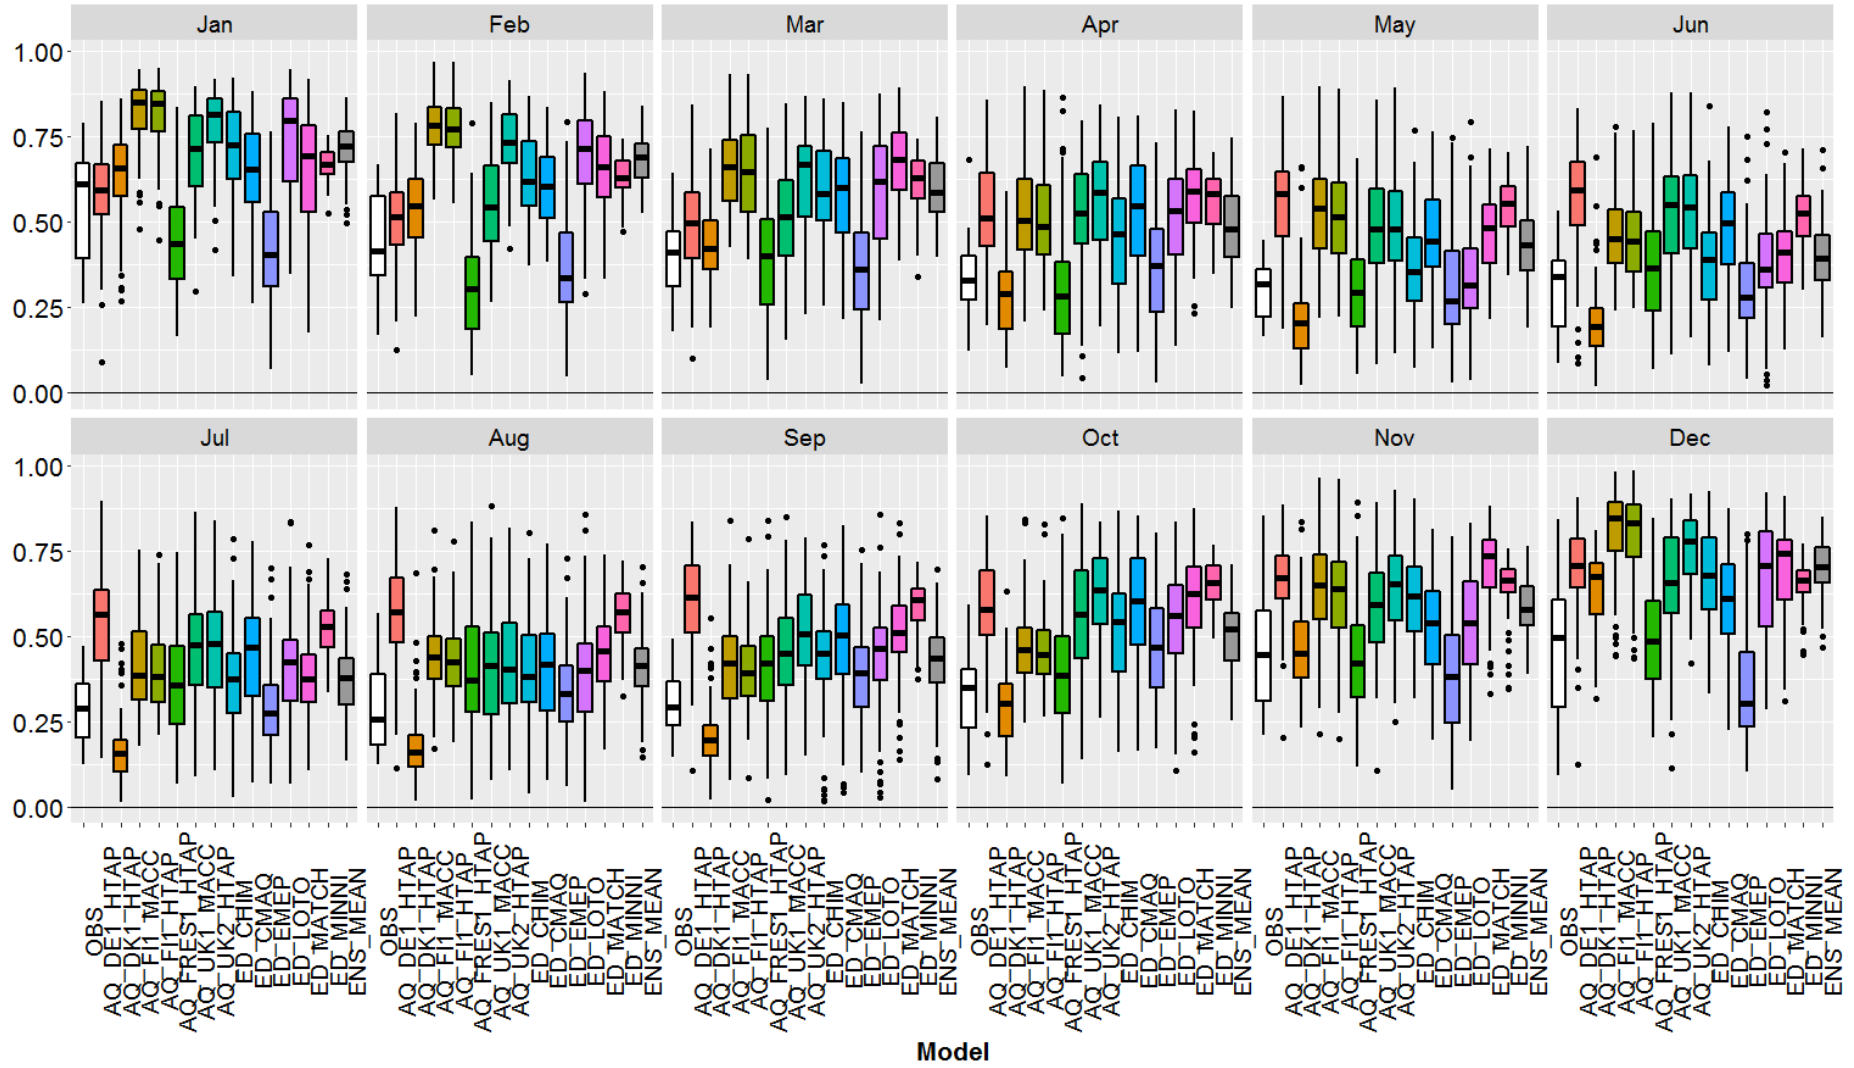

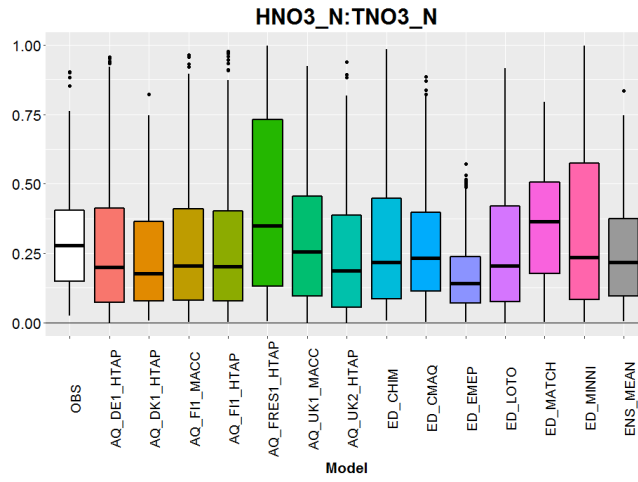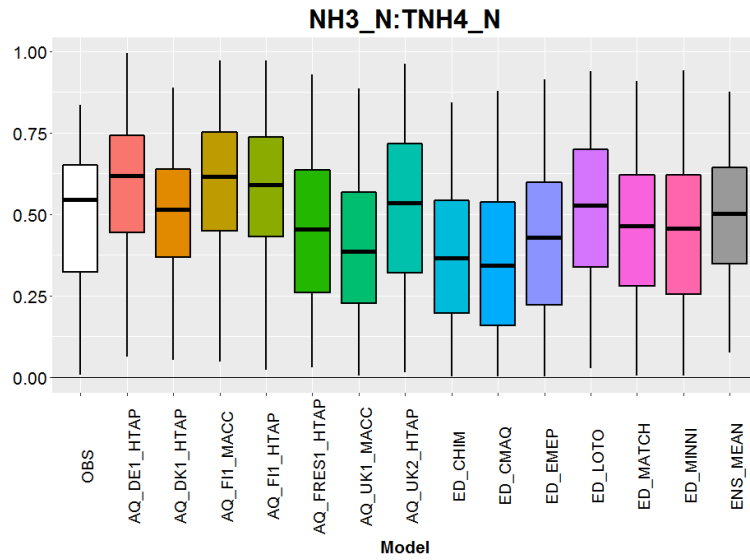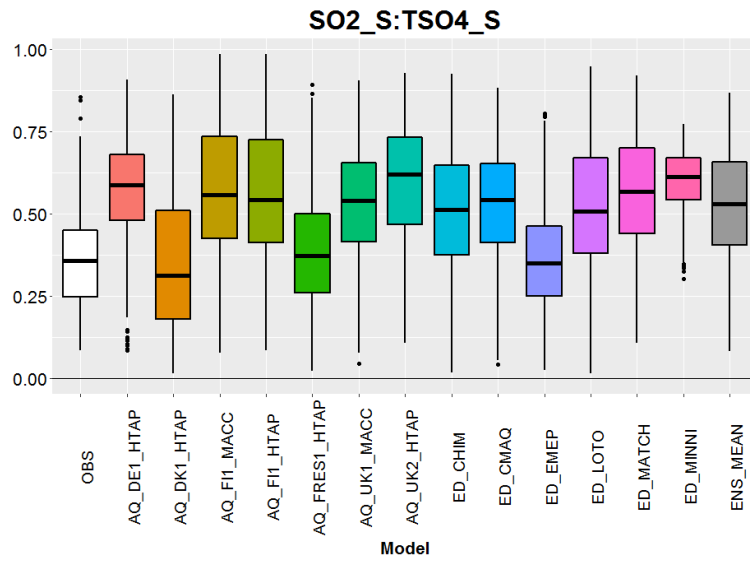

**S5. EFFECT ON WET DEPOSITION IN EUROPE OF A REDUCTION OF A 20% OF EMISSIONS 1) AT A GLOBAL SCALE, (GLO), 2) IN EUROPE (EUR) AND 3) IN NORTH AMERICA (NAM)**

**S5.1 EFFECT ON WET DEPOSITION IN EUROPE OF A REDUCTION OF A 20% OF GLOBAL EMISSIONS (GLO) FOR WNH4\_N (left), WNO3\_N (middle) and WSO4\_S (right), ACCORDING TO AQ\_FI1\_MACC**

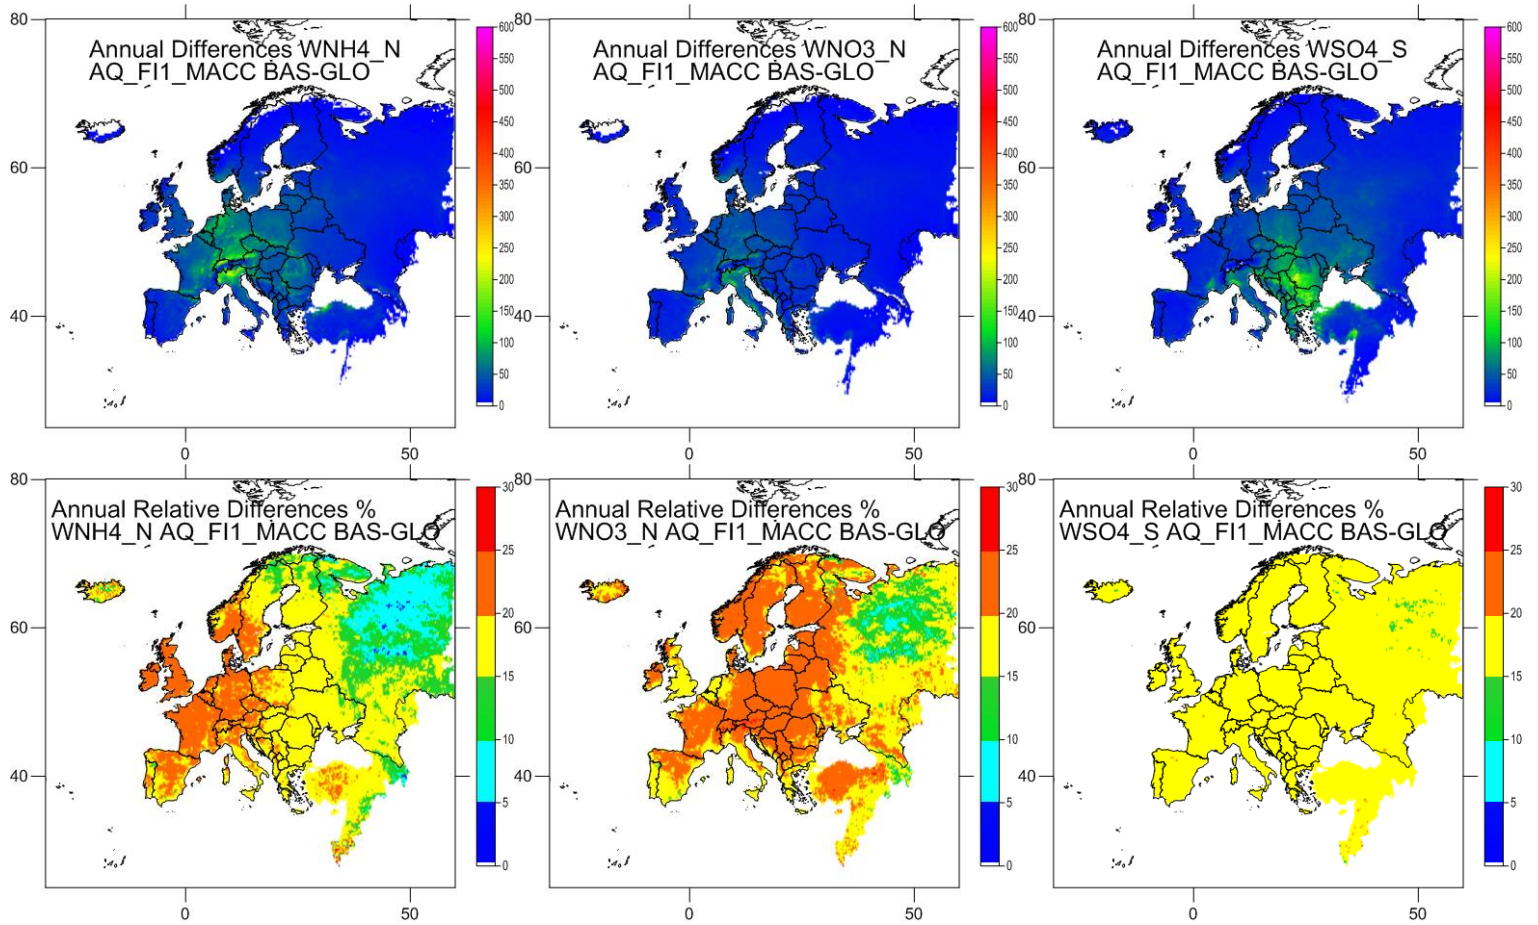

**S5.2 EFFECT ON WET DEPOSITION IN EUROPE OF A REDUCTION OF A 20% OF EUROPEAN EMISSIONS (EUR) FOR WNH4\_N (left), WNO3\_N (middle) and WSO4\_S (right), ACCORDING TO AQ\_FI1\_MACC**

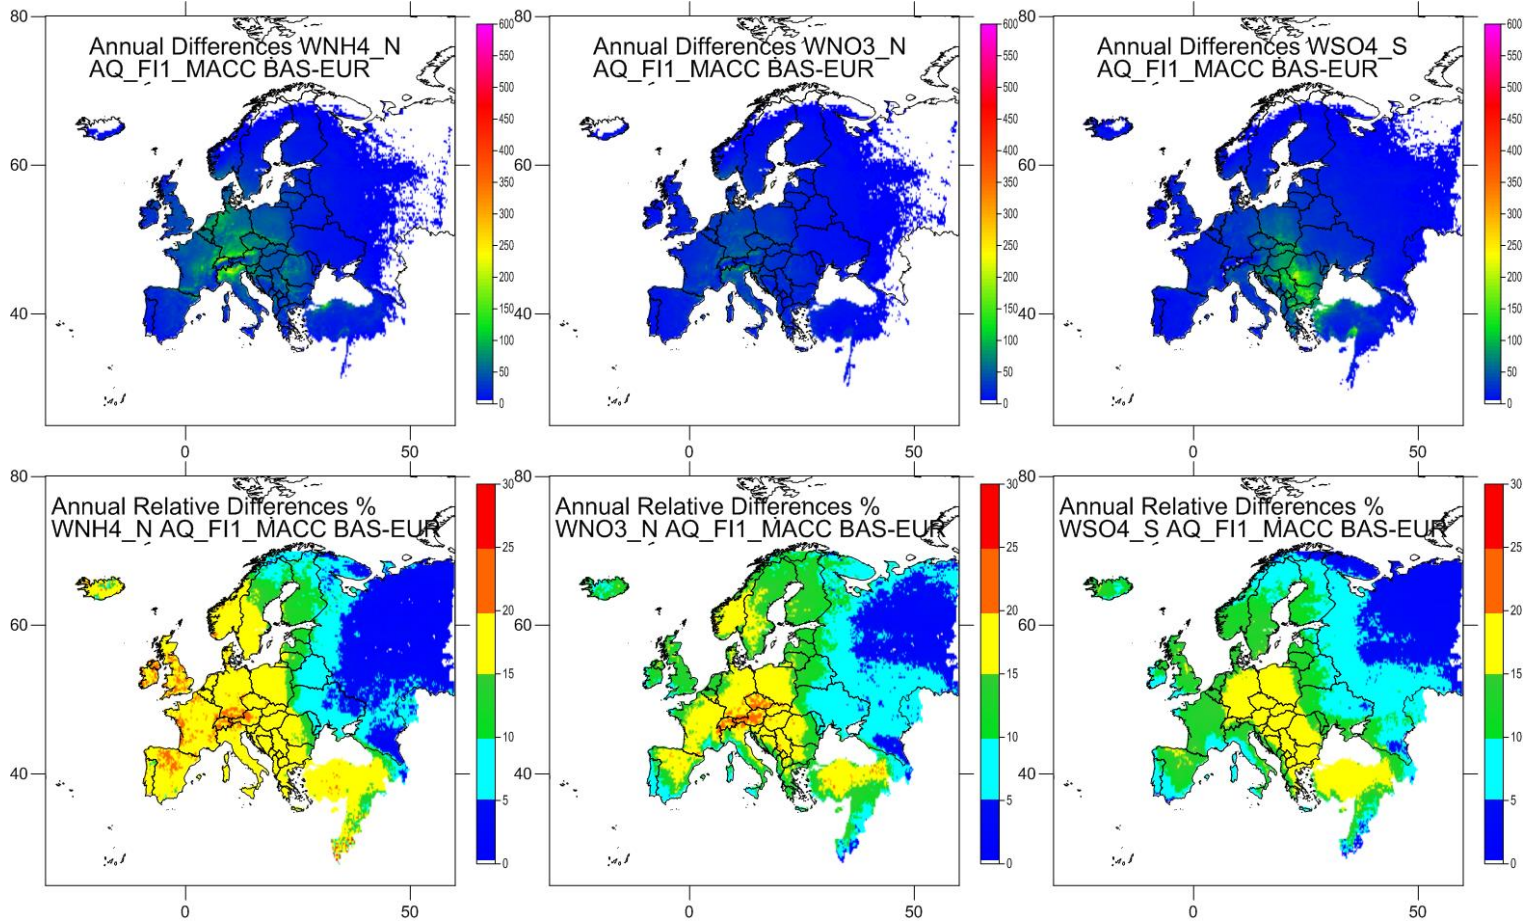

**S5.3. EFFECT ON WET DEPOSITION IN EUROPE OF A REDUCTION OF A 20% OF NORTH-AMERICAN EMISSIONS (NAM) FOR WNH4\_N (left), WNO3\_N (middle) and WSO4\_S (right), ACCORDING TO AQ\_FI1\_MACC**

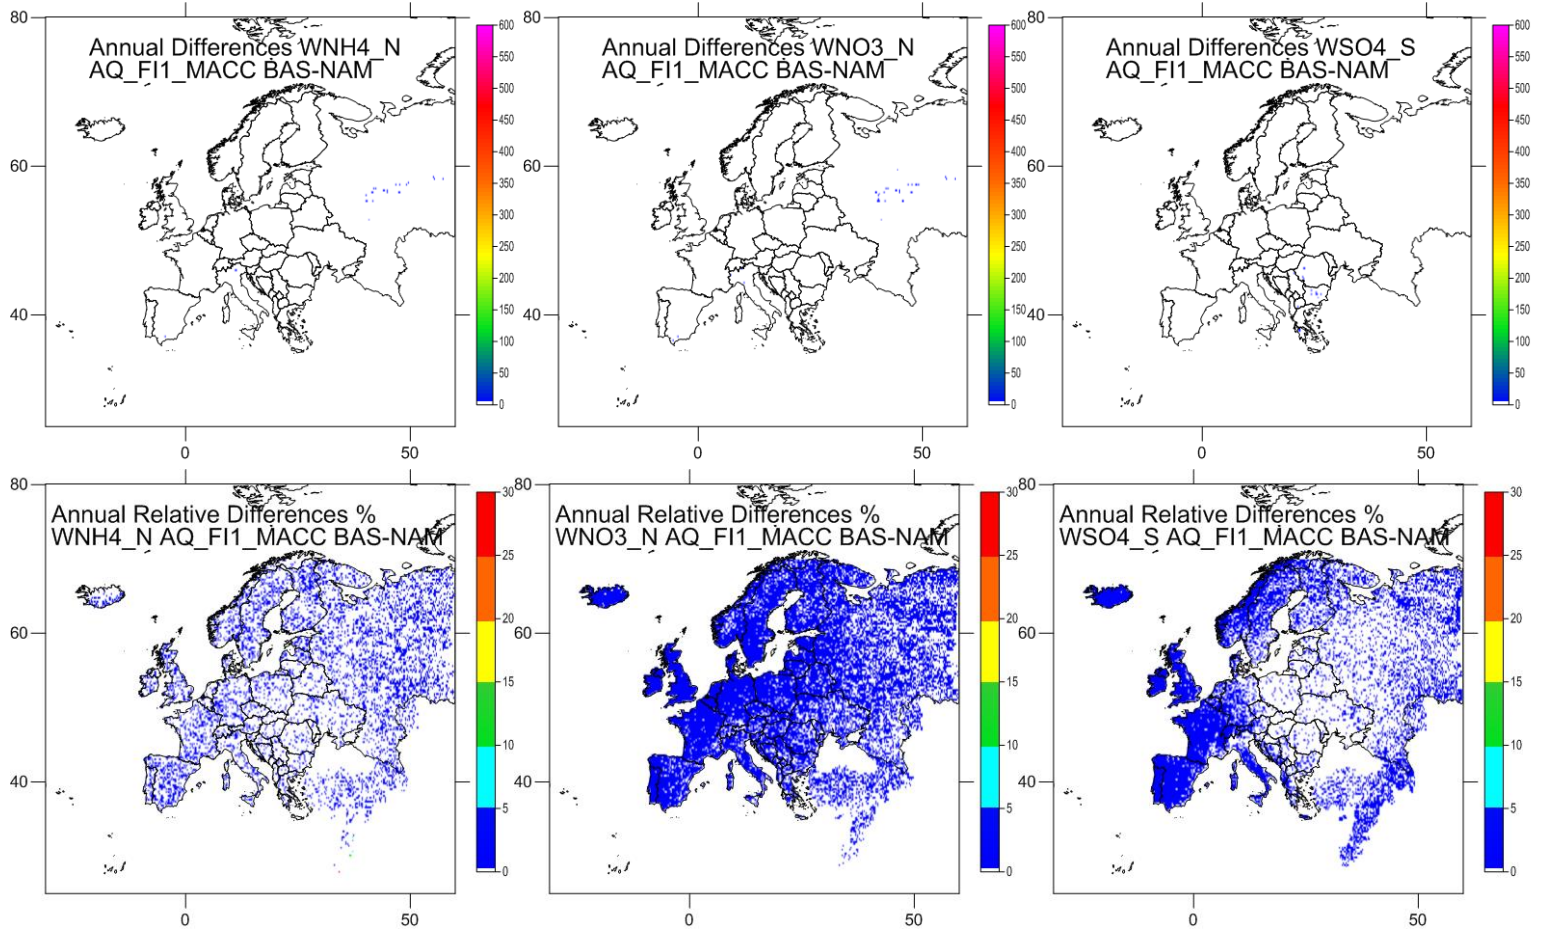

**S5.4 .** Effect on Europe of the reduction of 20% of emissions at a global scale (left maps), in Europe (middle) and in North America (right) for WNO3\_N, according to HT\_FRES1\_HTAP in terms of wet deposition

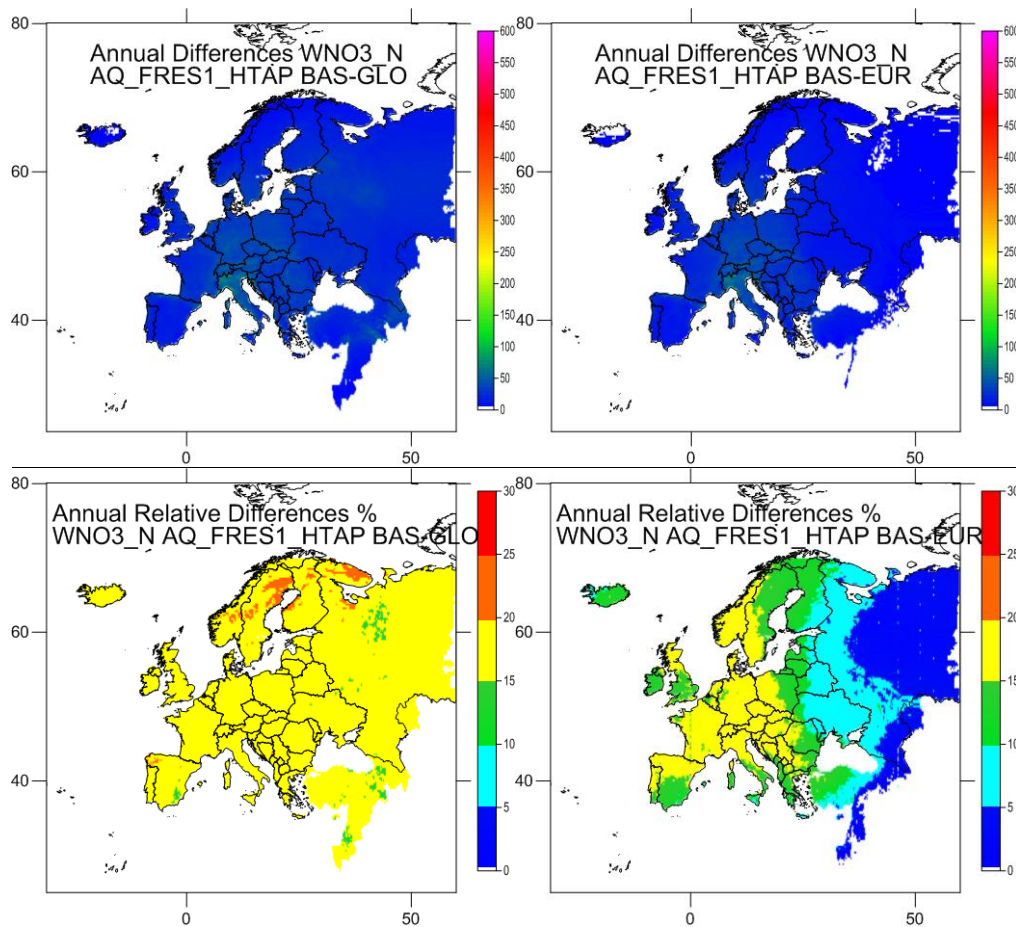

**S6. EFFECT ON DRY DEPOSITION IN EUROPE OF A REDUCTION OF A 20% OF EMISSIONS 1) AT A GLOBAL SCALE, (GLO), 2) IN EUROPE (EUR) AND 3) IN NORTH AMERICA (NAM)**



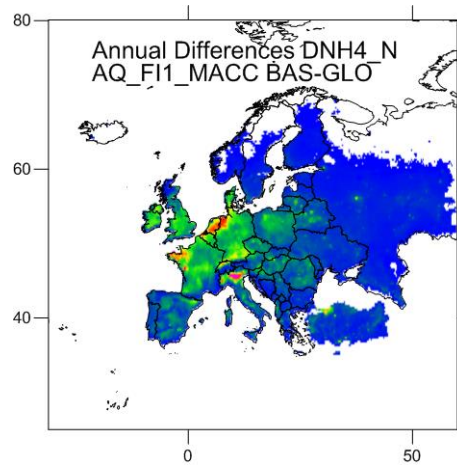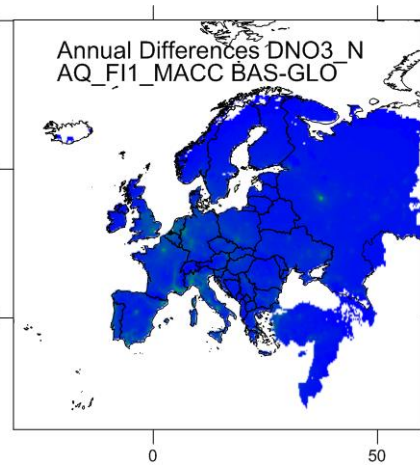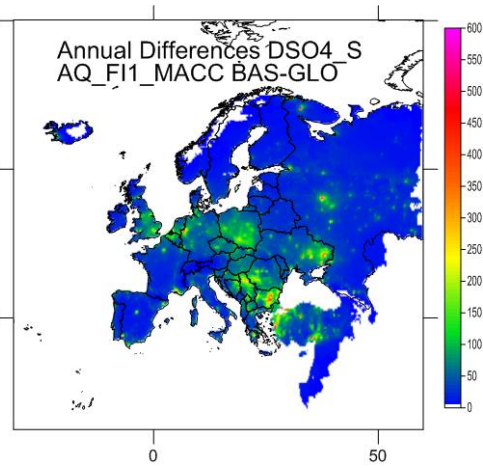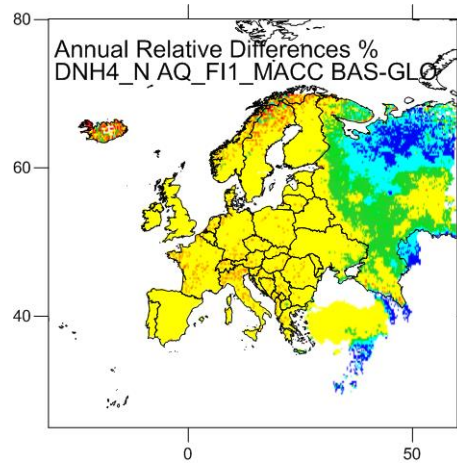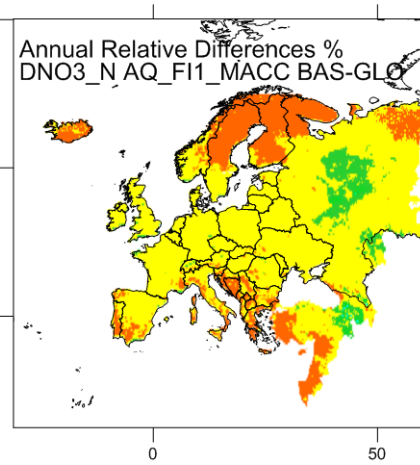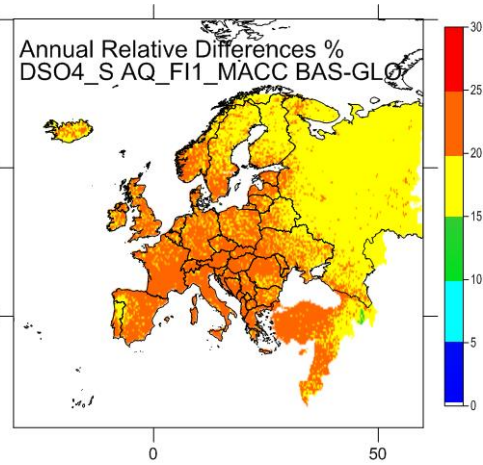

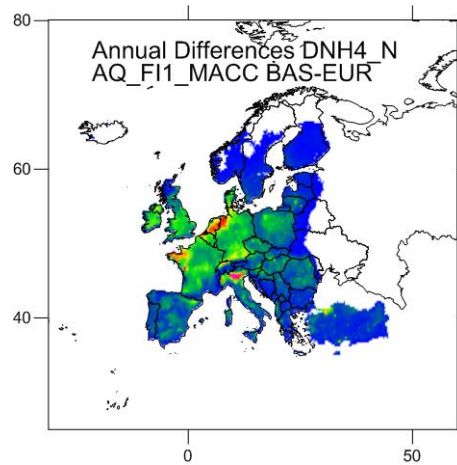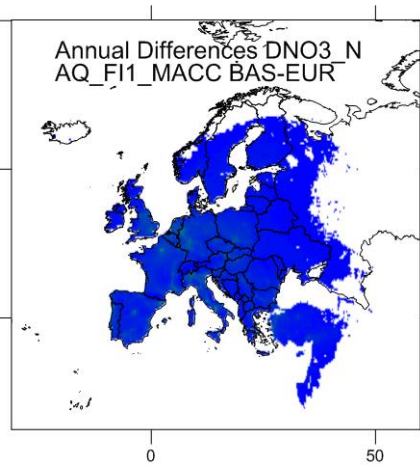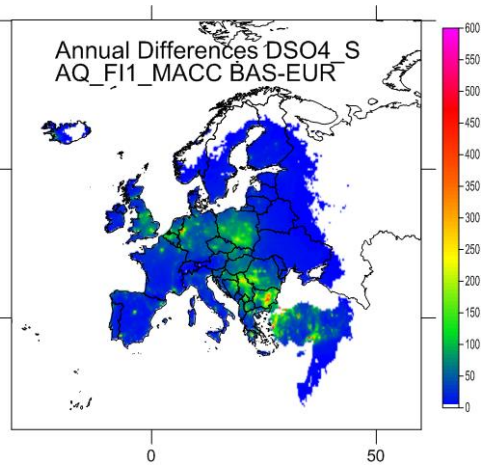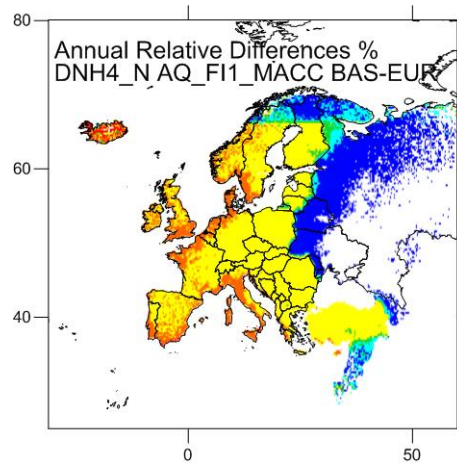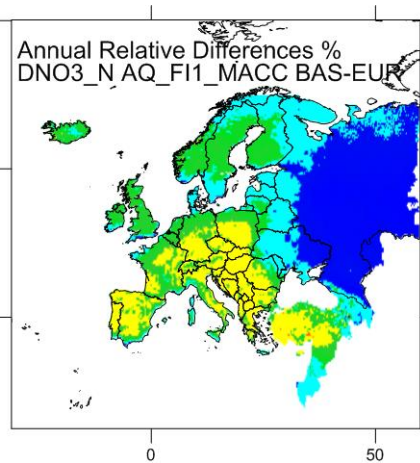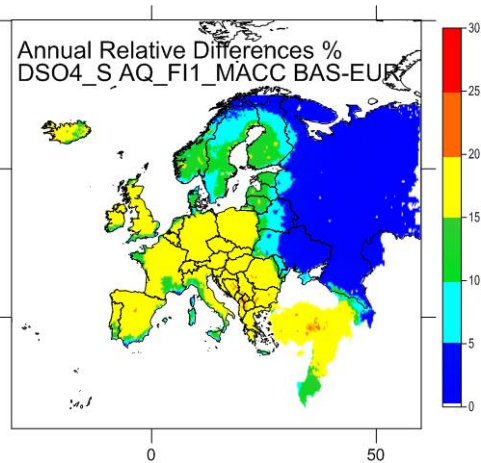

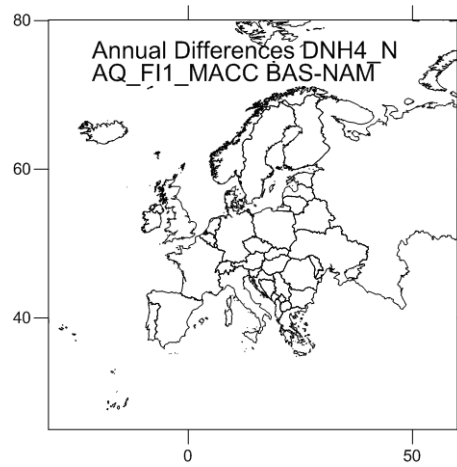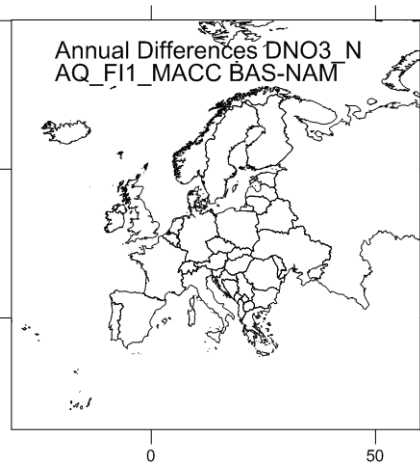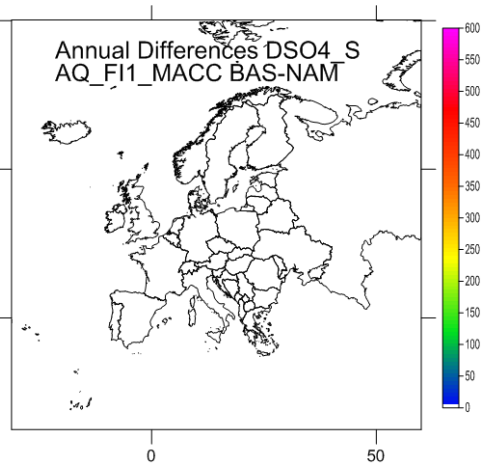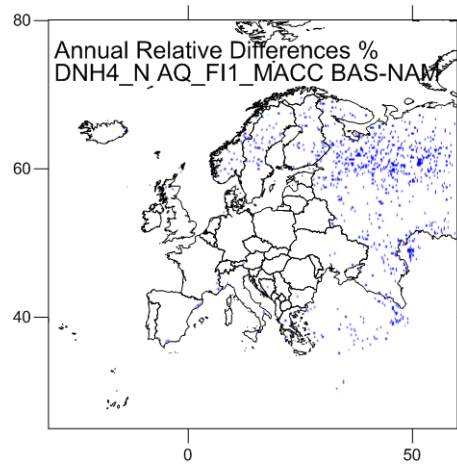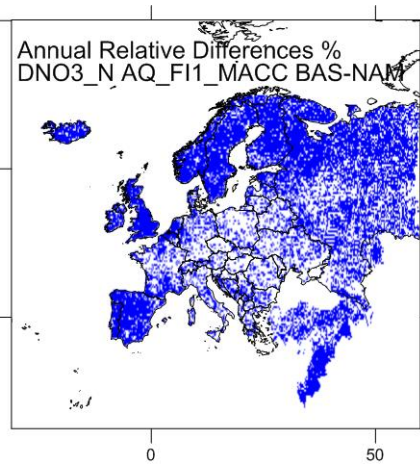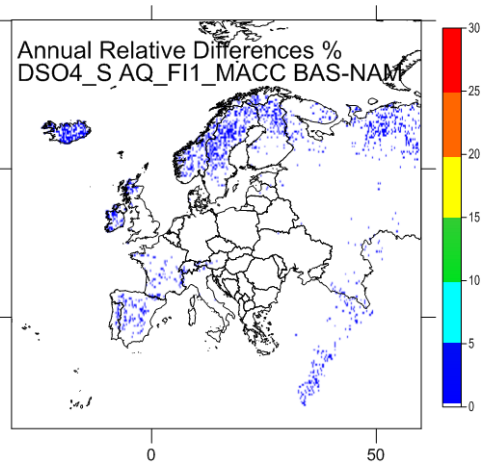

### S7A. Emissions of NOx, NH3 and SO2 for the AQMEI13/HTAP and ED/TFMM communities

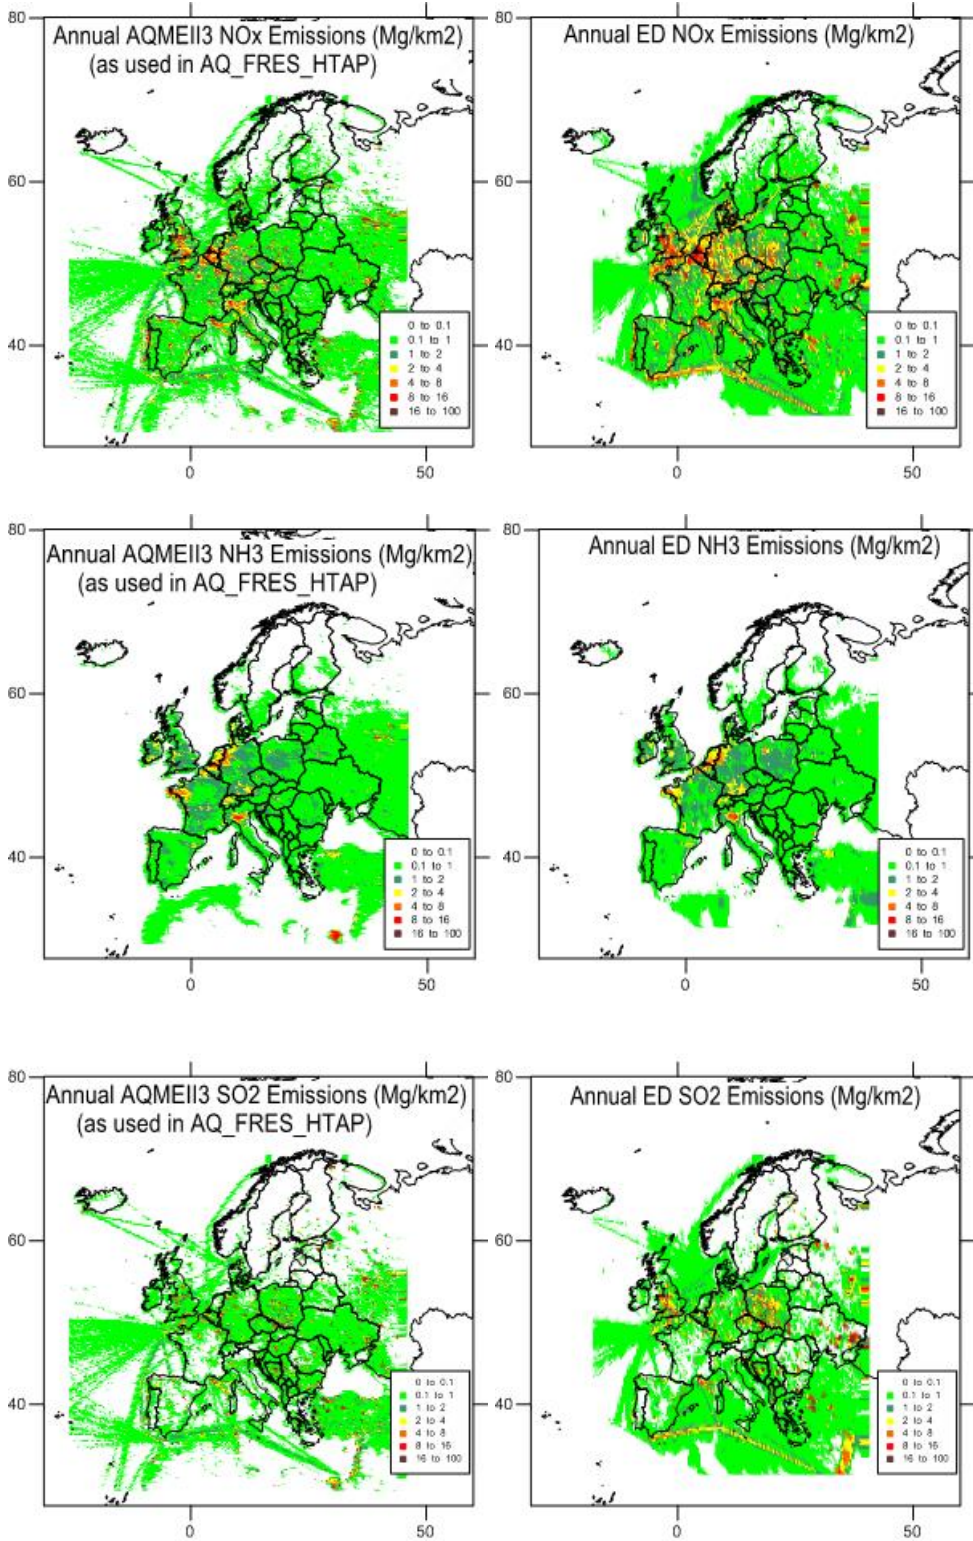

**S7B. Differences between the emissions of NOX, NH3 and SO2 of the AQMEI13/HTAP and ED/TFMM communities:**

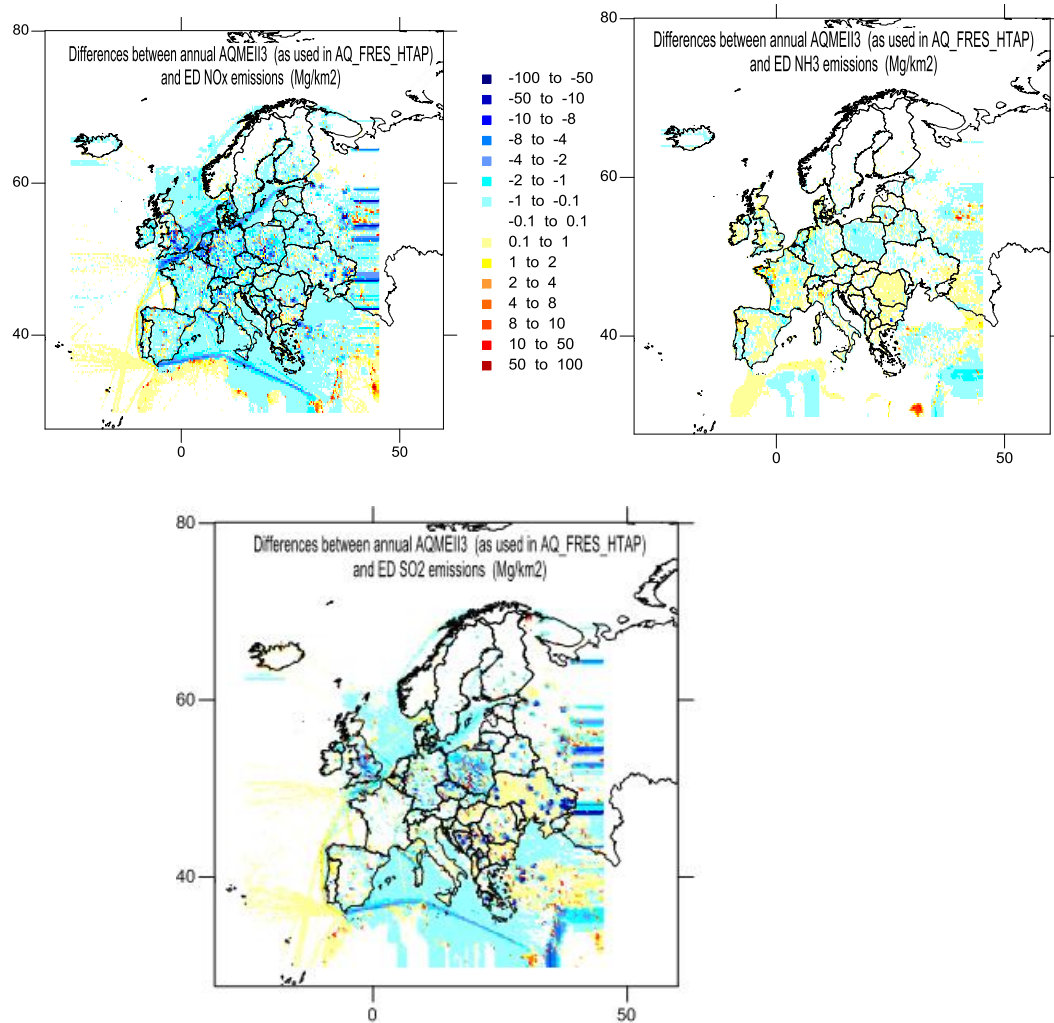

Supplement: Supplementary file [file acp-18-10199-2018-supplement.pdf]
